# Supplementary material for: Copper-catalyzed C–H acyloxylation of 2-phenylpyridine using oxygen as the oxidant
Source: Royal Society of Chemistry journal article supplement (doi:10.1039/c8ra01974f), 2018-01-01

*Supporting Information for*

## **Copper-Catalyzed C–H Acyloxylation of 2-Phenylpyridine Using Oxygen as Oxidant**

Feifan Wang, Zhiyang Lin, Weisheng Yu, Qingdong Hu, Chao Shu, and Wu Zhang\*

Key Laboratory of Functional Molecular Solids, Ministry of Education, Anhui Laboratory of Molecule-Based Materials, College of Chemistry and Materials Science, Anhui Normal University, Wuhu 241000, China.

### Table of Contents

|                                                                                       |          |
|---------------------------------------------------------------------------------------|----------|
| General Information.....                                                              | S2       |
| General Procedures.....                                                               | S2       |
| General Procedure for Copper-Catalyzed C–H Acyloxylation.....                         | S2       |
| Copper-Catalyzed C–H Acyloxylation of <b>1a</b> with benzoic acid (4 mmol scale) .... | S2       |
| Characterization Data of Products <b>3aa–3oa</b> .....                                | S3–S13   |
| Intermolecular Competition Experiments .....                                          | S14      |
| Control Experiments.....                                                              | S15– S17 |
| Copies of <sup>1</sup> H and <sup>13</sup> C NMR Spectra.....                         | S18–S51  |

## General Information

All starting materials and reagents were commercially available and used directly without further purification. Most of 2-phenylpyridines were synthesized by the reactions between the corresponding 2-bromopyridine or 2-Iodopyridine and phenylboronic acids according to the literature procedures.<sup>1</sup> All known products gave satisfactory analytical data by NMR spectra, corresponding to the reported literature values. In addition, unknown compounds were confirmed by HRMS. Melting points were determined using X-4 micro melting point apparatus and are uncorrected. NMR spectra were recorded at room temperature on a Bruker Avance-300 or Bruker Avance-500 at 300 MHz or 500 MHz with tetramethylsilane (TMS) as an internal standard. Chemical shifts are given in  $\delta$  relative to TMS, the coupling constants  $J$  are given in Hz. High-resolution mass spectra (HRMS) were recorded on Agilent 6200 LC/MS TOF using APCI or ESI in positive mode.

## General Procedures

### General Procedure for Copper-Catalyzed C–H Acyloxylation

To a 10 mL reaction tube was added 3-methyl-2-phenylpyridine **1a** (0.2 mmol), acid (0.3 mmol), CuBr (2.9 mg, 10 mol %), and chlorobenzene (2 mL) under oxygen atmosphere. The mixture was stirred at 130 °C for 24 h. The reaction mixture was then cooled to room temperature, diluted with ethyl acetate and quenched with saturated sodium chloride. The aqueous phase was extracted with ethyl acetate (3  $\times$  10 mL). The organic layer was dried over Na<sub>2</sub>SO<sub>4</sub>. After concentration, the resulting residue was purified by flash chromatography on silica gel (eluent: petroleum ether/ethyl acetate = 12/1) to afford the product.

### Copper-Catalyzed C–H Acyloxylation of **1a** with benzoic acid (4 mmol scale)

To a 50 mL reaction tube was added 3-methyl-2-phenylpyridine **1a** (676.9 mg, 4 mmol), benzoic acid **2a** (732.8 mg, 6 mmol), CuBr (57.4 mg, 10 mol %), chlorobenzene (15 mL) under oxygen atmosphere. The mixture was stirred at 130 °C for 24 h. The reaction mixture was then cooled to room temperature, diluted with ethyl acetate and quenched with saturated sodium chloride. The aqueous phase was extracted with ethyl acetate (3  $\times$  40 mL). The organic layer was dried over Na<sub>2</sub>SO<sub>4</sub>. After concentration, the resulting residue was purified by flash chromatography on silica gel (eluent: petroleum ether/ethyl acetate = 12/1) to afford the desired product **3aa** (936.8 mg, 81%) as a white solid.

---

(1) Rao, X. F.; Liu, C.; Qiu, J. S.; Jin, Z. L. *Org. Biomol. Chem.* **2012**, *10*, 7875.

### 2-(3-Methylpyridin-2-yl)phenyl benzoate 3aa

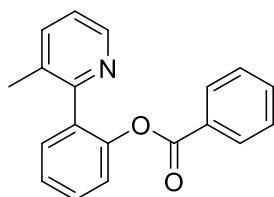

White solid. Mp = 93.8–94.6 °C.  $^1\text{H NMR}$  (300 MHz,  $\text{CDCl}_3$ ):  $\delta$  8.44 (d,  $J = 3.3$  Hz, 1H), 7.89 (d,  $J = 7.5$  Hz, 2H), 7.54–7.29 (m, 8H), 7.11–7.07 (m, 1H), 2.22 (s, 3H).  $^{13}\text{C NMR}$  (75 MHz,  $\text{CDCl}_3$ ):  $\delta$  164.6, 155.4, 148.3, 146.6, 137.9, 133.5, 133.4, 132.3, 130.5, 129.9, 129.3, 128.4, 128.1, 126.0, 122.8, 122.5, 19.1. HRMS (APCI): Calcd for  $\text{C}_{19}\text{H}_{16}\text{NO}_2$  [ $\text{M} + \text{H}$ ] $^+$  290.1181, found 290.1183.

### 2-(3-Methylpyridin-2-yl)phenyl-4-methylbenzoate 3ab

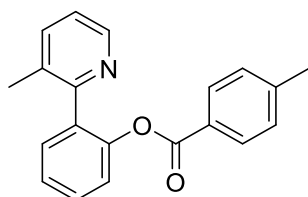

White solid. Mp = 100.6–101.5 °C.  $^1\text{H NMR}$  (300 MHz,  $\text{CDCl}_3$ ):  $\delta$  8.44 (d,  $J = 3.6$  Hz, 1H), 7.78 (d,  $J = 8.1$  Hz, 2H), 7.48–7.33 (m, 5H), 7.17 (d,  $J = 7.8$  Hz, 2H), 7.12–7.08 (m, 1H), 2.37 (s, 3H), 2.21 (s, 3H).  $^{13}\text{C NMR}$  (75 MHz,  $\text{CDCl}_3$ ):  $\delta$  164.6, 155.5, 148.4, 146.6, 144.1, 137.8, 133.6, 132.3, 130.4, 130.0, 129.3, 129.1, 126.6, 125.9, 122.8, 122.5, 21.7, 19.1. HRMS (APCI): Calcd for  $\text{C}_{20}\text{H}_{18}\text{NO}_2$  [ $\text{M} + \text{H}$ ] $^+$  304.1337, found 304.1341.

### 2-(3-Methylpyridin-2-yl)phenyl-2-methylbenzoate 3ac

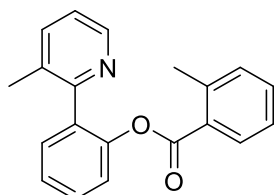

White solid. Mp = 91.7–93.0 °C.  $^1\text{H NMR}$  (300 MHz,  $\text{CDCl}_3$ ):  $\delta$  8.46 (d,  $J = 3.9$  Hz, 1H), 7.68 (d,  $J = 7.5$  Hz, 1H), 7.56–7.45 (m, 2H), 7.44–7.39 (m, 1H), 7.40–7.31 (m, 3H), 7.22–7.08 (m, 3H), 2.43 (s, 3H), 2.22 (s, 3H).  $^{13}\text{C NMR}$  (75 MHz,  $\text{CDCl}_3$ ):  $\delta$  165.3, 155.7, 148.4, 146.6, 140.8, 137.9, 133.7, 132.3, 131.6, 130.7, 130.4, 129.3, 128.6, 125.9, 125.6, 123.0, 122.5, 21.4, 19.1. HRMS (APCI): Calcd for  $\text{C}_{20}\text{H}_{18}\text{NO}_2$  [ $\text{M} + \text{H}$ ] $^+$  304.1337, found 304.1335.

### 2-(3-Methylpyridin-2-yl)phenyl-3-methylbenzoate 3ad

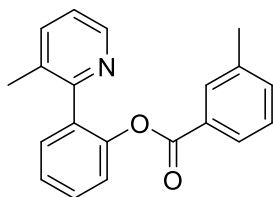

Yellow liquid.  $^1\text{H NMR}$  (300 MHz,  $\text{CDCl}_3$ ):  $\delta$  8.45 (d,  $J = 3.9$  Hz, 1H), 7.72–7.64 (m, 2H), 7.54–7.47 (m, 2H), 7.47–7.43 (m, 1H), 7.43–7.39 (m, 1H), 7.39–7.31 (m, 2H), 7.29–7.22 (m, 1H), 7.13–7.09 (m, 1H), 2.34 (s, 3H), 2.22 (s, 3H).  $^{13}\text{C NMR}$  (75 MHz,  $\text{CDCl}_3$ ):  $\delta$  164.7, 155.6, 148.4, 146.6, 138.2, 137.8, 134.1, 133.6, 132.3, 130.5, 130.4, 129.3, 128.2, 127.0, 125.9, 122.8, 122.4, 21.2, 19.1. HRMS (APCI): Calcd for  $\text{C}_{20}\text{H}_{18}\text{NO}_2$   $[\text{M} + \text{H}]^+$  304.1337, found 304.1342.

### 2-(3-Methylpyridin-2-yl)phenyl-4-methoxybenzoate 3ae

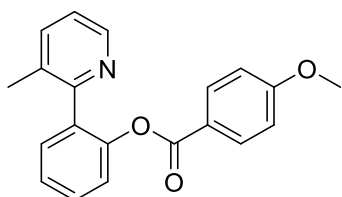

Yellow liquid.  $^1\text{H NMR}$  (300 MHz,  $\text{CDCl}_3$ ):  $\delta$  8.49–8.39 (m, 1H), 7.84 (d,  $J = 8.4$  Hz, 2H), 7.54–7.31 (m, 5H), 7.17–7.04 (m, 1H), 6.85 (d,  $J = 8.4$  Hz, 2H), 3.83 (s, 3H), 2.21 (s, 3H).  $^{13}\text{C NMR}$  (75 MHz,  $\text{CDCl}_3$ ):  $\delta$  164.2, 163.7, 155.6, 148.4, 146.6, 137.8, 133.6, 132.2, 132.0, 130.4, 129.2, 125.8, 122.9, 122.4, 121.6, 113.6, 55.4, 19.1. HRMS (APCI): Calcd for  $\text{C}_{20}\text{H}_{18}\text{NO}_3$   $[\text{M} + \text{H}]^+$  320.1287, found 320.1284.

### 2-(3-Methylpyridin-2-yl)phenyl-4-bromobenzoate 3af

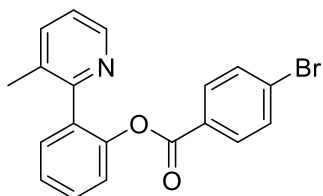

Yellow liquid.  $^1\text{H NMR}$  (300 MHz,  $\text{CDCl}_3$ ):  $\delta$  8.43 (d,  $J = 3.6$  Hz, 1H), 7.74 (d,  $J = 8.4$  Hz, 2H), 7.61–7.46 (m, 4H), 7.45–7.33 (m, 3H), 7.16–7.07 (m, 1H), 2.22 (s, 3H).  $^{13}\text{C NMR}$  (75 MHz,  $\text{CDCl}_3$ ):  $\delta$  162.9, 154.3, 147.1, 145.6, 136.9, 132.4, 131.2, 130.7, 130.4, 129.4, 128.4, 127.6, 127.2, 125.1, 121.7, 121.6, 18.1. HRMS (APCI): Calcd for  $\text{C}_{19}\text{H}_{15}\text{NO}_2\text{Br}$   $[\text{M} + \text{H}]^+$  368.0286, found 368.0285.

### 2-(3-Methylpyridin-2-yl)phenyl-2-chlorobenzoate 3ag

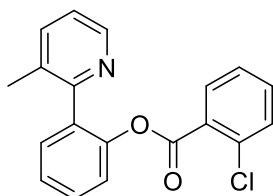

White solid. Mp = 81.7–82.6 °C.  $^1\text{H NMR}$  (300 MHz,  $\text{CDCl}_3$ ):  $\delta$  8.47 (d,  $J = 3.9$  Hz, 1H), 7.61–7.45 (m, 3H), 7.44–7.30 (m, 5H), 7.25–7.07 (m, 2H), 2.22 (s, 3H).  $^{13}\text{C NMR}$

**NMR** (75 MHz, CDCl<sub>3</sub>):  $\delta$  163.4, 155.5, 148.1, 146.6, 138.0, 134.0, 133.6, 132.8, 132.5, 131.4, 131.0, 130.5, 129.4, 129.2, 126.5, 126.2, 122.9, 122.7, 19.2. **HRMS** (APCI): Calcd for C<sub>19</sub>H<sub>15</sub>NO<sub>2</sub>Cl [M + H]<sup>+</sup> 324.0791, found 324.0798.

### 2-(3-Methylpyridin-2-yl)phenyl-3-chlorobenzoate 3ah

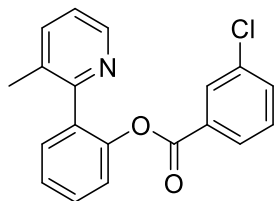

White solid. Mp = 84.6–86.4 °C. **<sup>1</sup>H NMR** (300 MHz, CDCl<sub>3</sub>):  $\delta$  8.48–8.39 (m, 1H), 7.83 (s, 1H), 7.77 (d, *J* = 7.8 Hz, 1H), 7.57–7.43 (m, 4H), 7.43–7.36 (m, 2H), 7.35–7.25 (m, 1H), 7.15–7.08 (m, 1H), 2.22 (s, 3H). **<sup>13</sup>C NMR** (75 MHz, CDCl<sub>3</sub>):  $\delta$  163.4, 155.3, 148.1, 146.7, 137.9, 134.5, 133.4, 133.3, 132.2, 131.1, 130.5, 129.9, 129.7, 129.4, 128.0, 126.1, 122.6, 19.1. **HRMS** (APCI): Calcd for C<sub>19</sub>H<sub>15</sub>NO<sub>2</sub>Cl [M + H]<sup>+</sup> 324.0791, found 324.0799.

### 2-(3-Methylpyridin-2-yl)phenyl-4-chlorobenzoate 3ai

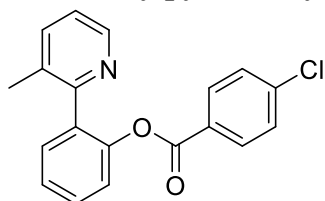

White solid. Mp = 76.1–77.3 °C. **<sup>1</sup>H NMR** (300 MHz, CDCl<sub>3</sub>):  $\delta$  8.40–8.29 (m, 1H), 7.74 (d, *J* = 8.4 Hz, 2H), 7.47–7.38 (m, 2H), 7.37–7.21 (m, 5H), 7.08–6.98 (m, 1H), 2.14 (s, 3H). **<sup>13</sup>C NMR** (75 MHz, CDCl<sub>3</sub>):  $\delta$  162.7, 154.3, 147.1, 145.6, 138.8, 136.9, 132.4, 131.2, 130.2, 129.4, 128.3, 127.7, 126.7, 125.1, 121.7, 121.5, 18.1. **HRMS** (APCI): Calcd for C<sub>19</sub>H<sub>15</sub>NO<sub>2</sub>Cl [M + H]<sup>+</sup> 324.0791, found 324.0792.

### 2-(3-Methylpyridin-2-yl)phenyl-4-(trifluoromethyl)benzoate 3aj

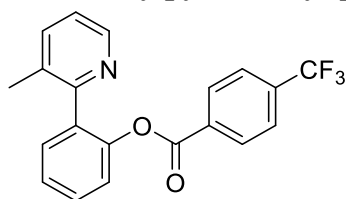

Yellow liquid. **<sup>1</sup>H NMR** (300 MHz, CDCl<sub>3</sub>):  $\delta$  8.47–8.37 (m, 1H), 8.03–7.93 (m, 2H), 7.64 (d, *J* = 7.8 Hz, 2H), 7.55–7.45 (m, 2H), 7.44–7.33 (m, 3H), 7.15–7.06 (m, 1H), 2.23 (s, 3H). **<sup>13</sup>C NMR** (75 MHz, CDCl<sub>3</sub>):  $\delta$  163.4, 155.3, 148.1, 146.7, 138.0, 134.7 (q, <sup>2</sup>*J*<sub>C-F</sub> = 32.5 Hz), 133.4, 132.6, 132.2, 130.5, 130.3, 129.4, 126.2, 125.4 (q, <sup>3</sup>*J*<sub>C-F</sub> = 3.5 Hz), 123.5 (q, <sup>1</sup>*J*<sub>C-F</sub> = 271.6 Hz), 122.7, 122.6, 19.1. **HRMS** (APCI): Calcd for C<sub>20</sub>H<sub>15</sub>NO<sub>2</sub>F<sub>3</sub> [M + H]<sup>+</sup> 358.1055, found 358.1052.

### 2-(3-Methylpyridin-2-yl)phenyl-4-(tert-butyl)benzoate 3ak

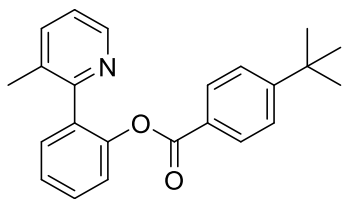

Yellow liquid.  $^1\text{H NMR}$  (300 MHz,  $\text{CDCl}_3$ ):  $\delta$  8.49–8.42 (m, 1H), 7.82 (d,  $J = 8.1$  Hz, 2H), 7.54–7.42 (m, 3H), 7.42–7.34 (m, 4H), 7.15–7.07 (m, 1H), 2.22 (s, 3H), 1.31 (s, 9H).  $^{13}\text{C NMR}$  (75 MHz,  $\text{CDCl}_3$ ):  $\delta$  164.5, 157.1, 155.6, 148.4, 146.7, 137.8, 133.6, 132.2, 130.4, 129.8, 129.3, 126.6, 125.8, 125.4, 122.8, 122.5, 35.1, 31.1, 19.1. HRMS (APCI): Calcd for  $\text{C}_{23}\text{H}_{24}\text{NO}_2$   $[\text{M} + \text{H}]^+$  346.1807, found 346.1803.

### 2-(3-Methylpyridin-2-yl)phenyl thiophene-2-carboxylate 3al

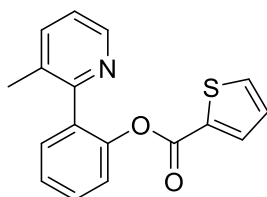

Yellow liquid.  $^1\text{H NMR}$  (300 MHz,  $\text{CDCl}_3$ ):  $\delta$  8.48–8.40 (m, 1H), 7.70 (dd,  $J = 3.6, 0.9$  Hz, 1H), 7.55–7.48 (m, 2H), 7.48–7.31 (m, 4H), 7.15–7.07 (m, 1H), 7.06–6.98 (m, 1H), 2.23 (s, 3H).  $^{13}\text{C NMR}$  (75 MHz,  $\text{CDCl}_3$ ):  $\delta$  159.8, 155.3, 147.9, 146.7, 137.8, 134.4, 133.5, 133.3, 132.5, 132.3, 130.5, 129.3, 127.8, 126.1, 122.7, 122.5, 19.1. HRMS (APCI): Calcd for  $\text{C}_{17}\text{H}_{14}\text{NO}_2\text{S}$   $[\text{M} + \text{H}]^+$  296.0745, found 296.0744.

### 2-(3-Methylpyridin-2-yl)phenyl-2-naphthoate 3am

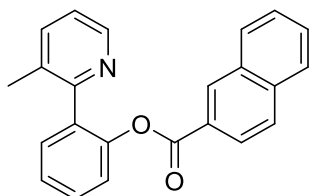

Yellow liquid.  $^1\text{H NMR}$  (300 MHz,  $\text{CDCl}_3$ ):  $\delta$  8.50–8.39 (m, 2H), 7.93–7.76 (m, 4H), 7.62–7.42 (m, 6H), 7.42–7.34 (m, 1H), 7.14–7.03 (m, 1H), 2.25 (s, 3H).  $^{13}\text{C NMR}$  (75 MHz,  $\text{CDCl}_3$ ):  $\delta$  164.7, 155.5, 148.5, 146.7, 137.9, 135.7, 133.6, 132.4, 132.3, 131.7, 130.5, 129.4, 129.4, 128.5, 128.2, 127.7, 126.7, 126.6, 126.0, 125.3, 122.8, 122.5, 19.2. HRMS (APCI): Calcd for  $\text{C}_{23}\text{H}_{18}\text{NO}_2$   $[\text{M} + \text{H}]^+$  340.1337, found 340.1331.

### 2-(3-Methylpyridin-2-yl)phenyl-(E)-3-(p-tolyl)acrylate 3an

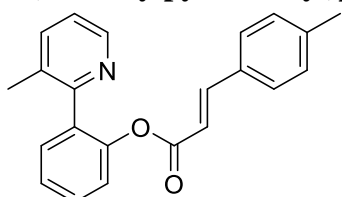

White solid. Mp = 64.2–65.6 °C.  $^1\text{H NMR}$  (300 MHz,  $\text{CDCl}_3$ ):  $\delta$  8.55–8.43 (m, 1H), 7.64–7.50 (m, 2H), 7.50–7.40 (m, 2H), 7.40–7.28 (m, 4H), 7.23–7.06 (m, 3H), 6.31 (d,

$J = 15.9$  Hz, 1H), 2.36 (s, 3H), 2.22 (s, 3H).  $^{13}\text{C}$  NMR (75 MHz,  $\text{CDCl}_3$ ):  $\delta$  164.9, 155.5, 148.2, 146.6, 146.3, 141.2, 137.9, 133.5, 132.3, 131.4, 130.5, 129.7, 129.3, 128.2, 125.8, 122.8, 122.5, 115.8, 21.5, 19.1. HRMS (APCI): Calcd for  $\text{C}_{22}\text{H}_{20}\text{NO}_2$   $[\text{M} + \text{H}]^+$  330.1494, found 330.1492.

### 2-(3-Methylpyridin-2-yl)phenyl-(E)-3-(4-chlorophenyl)acrylate 3ao

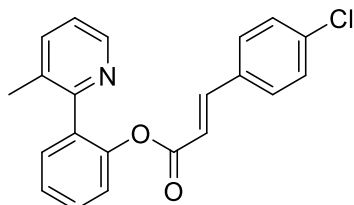

White solid. Mp = 128.3–129.6 °C.  $^1\text{H}$  NMR (300 MHz,  $\text{CDCl}_3$ ):  $\delta$  8.86–8.38 (m, 1H), 7.64–7.50 (m, 2H), 7.48–7.27 (m, 8H), 7.22–7.09 (m, 1H), 6.33 (d,  $J = 15.9$  Hz, 1H), 2.23 (s, 3H).  $^{13}\text{C}$  NMR (75 MHz,  $\text{CDCl}_3$ ):  $\delta$  164.5, 155.5, 148.1, 146.7, 144.8, 137.9, 136.5, 133.5, 132.6, 132.3, 130.5, 129.4, 129.3, 129.2, 125.9, 122.7, 122.5, 117.5, 19.1. HRMS (APCI): Calcd for  $\text{C}_{21}\text{H}_{17}\text{NO}_2\text{Cl}$   $[\text{M} + \text{H}]^+$  350.0948, found 350.0950.

### 2-(3-Methylpyridin-2-yl)phenyl-(E)-3-(4-bromophenyl)acrylate 3ap

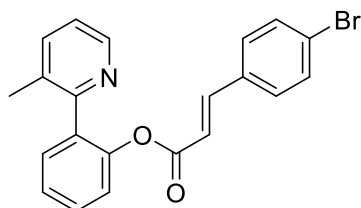

White solid. Mp = 113.2–114.5 °C.  $^1\text{H}$  NMR (300 MHz,  $\text{CDCl}_3$ ):  $\delta$  8.54–8.41 (m, 1H), 7.59–7.52 (m, 1H), 7.52–7.42 (m, 3H), 7.42–7.21 (m, 6H), 7.20–7.08 (m, 1H), 6.34 (d,  $J = 15.9$  Hz, 1H), 2.22 (s, 3H).  $^{13}\text{C}$  NMR (75 MHz,  $\text{CDCl}_3$ ):  $\delta$  164.5, 155.5, 148.1, 146.6, 144.9, 138.0, 133.4, 133.0, 132.3, 132.2, 130.5, 129.6, 129.3, 125.9, 124.9, 122.7, 122.6, 117.6, 19.1. HRMS (APCI): Calcd for  $\text{C}_{21}\text{H}_{17}\text{NO}_2\text{Br}$   $[\text{M} + \text{H}]^+$  394.0443, found 394.0447.

### 2-(3-Methylpyridin-2-yl)phenyl-(E)-3-(4-(trifluoromethyl)phenyl)acrylate 3aq

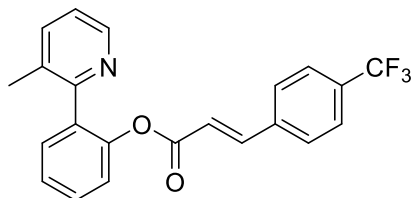

White solid. Mp = 81.6–82.3 °C.  $^1\text{H}$  NMR (400 MHz,  $\text{CDCl}_3$ ):  $\delta$  8.49 (d,  $J = 4.0$  Hz, 1H), 7.67–7.60 (m, 3H), 7.59–7.50 (m, 3H), 7.50–7.44 (m, 1H), 7.44–7.39 (m, 1H), 7.37 (d,  $J = 8.8$  Hz, 1H), 7.35–7.29 (m, 1H), 7.15 (dd,  $J = 7.6, 4.8$  Hz, 1H), 6.43 (d,  $J = 16.0$  Hz, 1H), 2.24 (s, 3H).  $^{13}\text{C}$  NMR (100 MHz,  $\text{CDCl}_3$ ):  $\delta$  164.2, 155.5, 148.0,

146.7, 144.3, 138.0, 137.4, 133.5, 132.3, 132.0 (q,  $^2J_{C-F} = 32.4$  Hz), 130.5, 129.3, 128.3, 126.0, 125.9 (q,  $^3J_{C-F} = 3.8$  Hz), 123.8 (q,  $^1J_{C-F} = 270.6$  Hz), 122.7, 122.6, 119.5, 19.1. HRMS (ESI): Calcd for  $C_{22}H_{17}NO_2F_3$   $[M + H]^+$  384.1211, found 384.1208.

### 2-(3-Methylpyridin-2-yl)phenyl pivalate 3ar

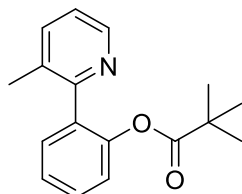

Yellow liquid.  $^1H$  NMR (300 MHz,  $CDCl_3$ ):  $\delta$  8.54–8.42 (m, 1H), 7.63–7.49 (m, 1H), 7.46–7.38 (m, 1H), 7.37–7.28 (m, 2H), 7.22–7.11 (m, 2H), 2.18 (s, 3H), 1.00 (s, 9H).  $^{13}C$  NMR (75 MHz,  $CDCl_3$ ):  $\delta$  176.3, 155.7, 148.3, 146.5, 137.7, 133.7, 132.5, 130.0, 129.2, 125.7, 122.8, 122.5, 38.8, 26.8, 19.0. HRMS (APCI): Calcd for  $C_{17}H_{20}NO_2$   $[M + H]^+$  270.1494, found 270.1491.

### 2-(3-Methylpyridin-2-yl)phenyl isobutyrate 3as

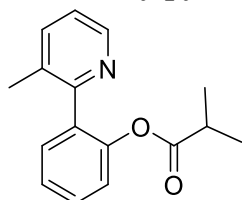

Yellow liquid.  $^1H$  NMR (300 MHz,  $CDCl_3$ ):  $\delta$  8.54–8.44 (m, 1H), 7.56 (d,  $J = 7.8$  Hz, 1H), 7.47–7.38 (m, 1H), 7.38–7.29 (m, 2H), 7.23–7.14 (m, 2H), 2.61–2.43 (m, 1H), 2.19 (s, 3H), 0.94 (d,  $J = 6.9$  Hz, 6H).  $^{13}C$  NMR (75 MHz,  $CDCl_3$ ):  $\delta$  175.0, 155.6, 148.1, 146.5, 137.8, 133.7, 132.5, 130.2, 129.2, 125.8, 122.8, 122.5, 33.9, 19.0, 18.5. HRMS (APCI): Calcd for  $C_{16}H_{18}NO_2$   $[M + H]^+$  256.1337, found 256.1334.

### 2-(3-Methylpyridin-2-yl)phenyl-2-phenylbutanoate 3at

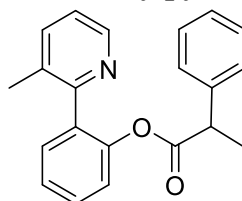

Yellow liquid.  $^1H$  NMR (300 MHz,  $CDCl_3$ ):  $\delta$  8.39–8.28 (m, 1H), 7.45–7.33 (m, 3H), 7.32–7.26 (m, 2H), 7.24–7.17 (m, 3H), 7.14–7.01 (m, 3H), 3.42 (t,  $J = 7.8$  Hz, 1H), 2.03 (s, 3H), 1.98–1.83 (m, 1H), 1.73–1.55 (m, 1H), 0.72 (t,  $J = 7.5$  Hz, 3H).  $^{13}C$  NMR (75 MHz,  $CDCl_3$ ):  $\delta$  171.8, 155.1, 148.0, 146.4, 138.2, 137.7, 133.6, 132.2, 130.3, 129.2, 128.6, 127.8, 127.1, 125.9, 122.6, 122.5, 53.2, 26.4, 18.9, 11.9. HRMS (APCI): Calcd for  $C_{22}H_{22}NO_2$   $[M + H]^+$  332.1650, found 332.1648.



### 2-(Pyridin-2-yl)phenyl benzoate 3ba

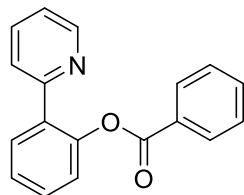

White solid. Mp = 91.4–92.6 °C.  $^1\text{H NMR}$  (300 MHz,  $\text{CDCl}_3$ ):  $\delta$  8.59 (d,  $J$  = 4.5 Hz, 1H), 8.18–7.99 (m, 2H), 7.78 (d,  $J$  = 6.0 Hz, 1H), 7.70–7.53 (m, 3H), 7.53–7.36 (m, 4H), 7.34–7.27 (m, 1H), 7.20–7.09 (m, 1H).  $^{13}\text{C NMR}$  (75 MHz,  $\text{CDCl}_3$ ):  $\delta$  165.2, 155.5, 149.6, 148.3, 136.2, 133.5, 133.3, 130.9, 130.2, 129.8, 129.5, 128.5, 126.4, 123.7, 123.4, 122.2. HRMS (APCI): Calcd for  $\text{C}_{18}\text{H}_{14}\text{NO}_2$  [ $\text{M} + \text{H}$ ] $^+$  276.1024, found 276.1018.

### 3-Methyl-2-(pyridin-2-yl)phenyl benzoate 3ca

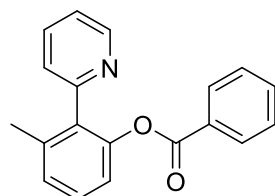

Yellow liquid.  $^1\text{H NMR}$  (400 MHz,  $\text{CDCl}_3$ ):  $\delta$  8.66–8.62 (m, 1H), 7.88–7.80 (m, 2H), 7.67–7.57 (m, 1H), 7.55–7.47 (m, 1H), 7.40–7.32 (m, 3H), 7.31–7.27 (m, 1H), 7.24–7.20 (m, 1H), 7.18–7.12 (m, 2H), 2.19 (s, 3H).  $^{13}\text{C NMR}$  (125 MHz,  $\text{CDCl}_3$ ):  $\delta$  164.1, 154.7, 148.4, 147.6, 137.2, 135.1, 132.6, 132.3, 128.9, 128.3, 127.9, 127.3, 126.9, 123.8, 121.1, 119.1, 18.9. HRMS (APCI): Calcd for  $\text{C}_{19}\text{H}_{16}\text{NO}_2$  [ $\text{M} + \text{H}$ ] $^+$  290.1181, found 290.1175.

### 4-Methyl-2-(pyridin-2-yl)phenyl benzoate 3da

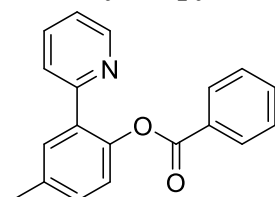

Yellow liquid.  $^1\text{H NMR}$  (300 MHz,  $\text{CDCl}_3$ ):  $\delta$  8.70–8.54 (m, 1H), 8.08 (d,  $J$  = 7.5 Hz, 2H), 7.71–7.51 (m, 4H), 7.49–7.38 (m, 2H), 7.32–7.22 (m, 1H), 7.21–7.07 (m, 2H), 2.43 (s, 3H).  $^{13}\text{C NMR}$  (75 MHz,  $\text{CDCl}_3$ ):  $\delta$  165.3, 155.6, 149.6, 146.0, 136.1, 133.4, 132.8, 131.3, 130.4, 130.1, 129.5, 128.5, 123.7, 123.0, 122.1, 20.9. HRMS (APCI): Calcd for  $\text{C}_{19}\text{H}_{16}\text{NO}_2$  [ $\text{M} + \text{H}$ ] $^+$  290.1181, found 290.1188.

### 5-Methyl-2-(pyridin-2-yl)phenyl benzoate 3ea

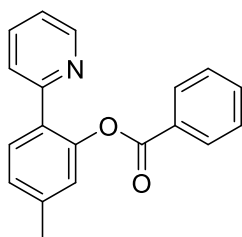

Yellow liquid.  $^1\text{H NMR}$  (300 MHz,  $\text{CDCl}_3$ ):  $\delta$  8.64–8.52 (m, 1H), 8.09 (d,  $J = 6.6$  Hz, 2H), 7.68 (d,  $J = 7.5$  Hz, 1H), 7.65–7.51 (m, 3H), 7.50–7.40 (m, 2H), 7.30–7.17 (m, 1H), 7.17–7.07 (m, 2H), 2.43 (s, 3H).  $^{13}\text{C NMR}$  (75 MHz,  $\text{CDCl}_3$ ):  $\delta$  164.2, 154.5, 148.4, 147.1, 139.2, 135.1, 132.4, 129.6, 129.3, 129.1, 128.5, 127.4, 126.2, 122.7, 122.5, 120.9, 20.1. HRMS (APCI): Calcd for  $\text{C}_{19}\text{H}_{16}\text{NO}_2$   $[\text{M} + \text{H}]^+$  290.1181, found 290.1184.

### 5-Methoxy-2-(pyridin-2-yl)phenyl benzoate 3fa

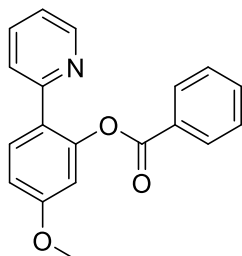

Yellow liquid.  $^1\text{H NMR}$  (300 MHz,  $\text{CDCl}_3$ ):  $\delta$  8.62–8.52 (m, 1H), 8.10 (d,  $J = 6.6$  Hz, 2H), 7.742 (d,  $J = 8.4$  Hz, 1H), 7.66–7.52 (m, 3H), 7.52–7.41 (m, 2H), 7.17–7.07 (m, 1H), 7.01–6.91 (m, 1H), 6.85 (s, 1H), 3.87 (s, 3H).  $^{13}\text{C NMR}$  (75 MHz,  $\text{CDCl}_3$ ):  $\delta$  165.1, 160.7, 155.3, 149.5, 149.2, 136.2, 133.5, 131.6, 130.2, 129.4, 128.5, 128.2, 123.4, 121.7, 112.6, 108.7, 55.6. HRMS (APCI): Calcd for  $\text{C}_{19}\text{H}_{16}\text{NO}_3$   $[\text{M} + \text{H}]^+$  306.1130, found 306.1125.

### 3-Methoxy-2-(pyridin-2-yl)phenyl benzoate 3ga

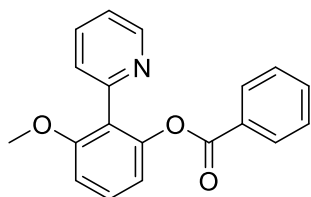

White solid. Mp = 82.6–84.2 °C.  $^1\text{H NMR}$  (300 MHz,  $\text{CDCl}_3$ ):  $\delta$  8.66–8.53 (m, 1H), 7.89 (d,  $J = 7.5$  Hz, 2H), 7.71–7.58 (m, 1H), 7.58–7.48 (m, 1H), 7.47–7.31 (m, 4H), 7.19–7.09 (m, 1H), 8.96 (d,  $J = 2.7$  Hz, 1H), 6.94 (d,  $J = 3.3$  Hz, 1H), 3.80 (s, 3H).  $^{13}\text{C NMR}$  (75 MHz,  $\text{CDCl}_3$ ):  $\delta$  165.0, 158.0, 153.2, 149.6, 149.2, 135.7, 133.3, 130.0, 129.6, 129.3, 128.3, 125.8, 123.5, 122.0, 115.4, 108.9, 56.1. HRMS (APCI): Calcd for  $\text{C}_{19}\text{H}_{16}\text{NO}_3$   $[\text{M} + \text{H}]^+$  306.1130, found 306.1122.

### 3-Chloro-2-(pyridin-2-yl)phenyl benzoate 3ha

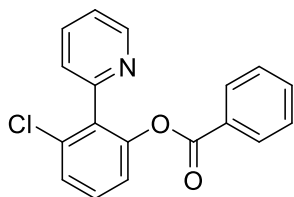

Yellow liquid.  $^1\text{H NMR}$  (300 MHz,  $\text{CDCl}_3$ ):  $\delta$  8.67–8.56 (m, 1H), 7.94–7.78 (m, 2H), 7.73–7.61 (m, 1H), 7.58–7.48 (m, 1H), 7.47–7.42 (m, 1H), 7.42–7.31 (m, 4H), 7.30–7.23 (m, 1H), 7.23–7.13 (m, 1H).  $^{13}\text{C NMR}$  (75 MHz,  $\text{CDCl}_3$ ):  $\delta$  164.7, 153.6, 149.7, 149.4, 136.1, 134.0, 133.6, 133.3, 130.0, 129.7, 128.8, 128.4, 127.4, 125.4, 122.7, 121.7. HRMS (APCI): Calcd for  $\text{C}_{18}\text{H}_{13}\text{NO}_2\text{Cl}$  [ $\text{M} + \text{H}$ ] $^+$  310.0634, found 310.0635.

#### 4-Chloro-2-(pyridin-2-yl)phenyl benzoate 3ia

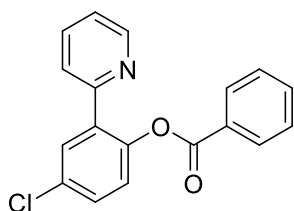

Yellow liquid.  $^1\text{H NMR}$  (300 MHz,  $\text{CDCl}_3$ ):  $\delta$  8.71–8.56 (m, 1H), 8.15–8.01 (m, 2H), 7.86–7.77 (m, 1H), 7.70–7.52 (m, 3H), 7.52–7.39 (m, 3H), 7.32–7.23 (m, 1H), 7.23–7.15 (m, 1H).  $^{13}\text{C NMR}$  (75 MHz,  $\text{CDCl}_3$ ):  $\delta$  163.9, 153.1, 148.7, 145.7, 135.4, 133.6, 132.7, 130.8, 129.8, 129.2, 128.6, 128.0, 127.5, 123.7, 122.7, 121.6. HRMS (APCI): Calcd for  $\text{C}_{18}\text{H}_{13}\text{NO}_2\text{Cl}$  [ $\text{M} + \text{H}$ ] $^+$  310.0634, found 310.0631.

#### 5-Chloro-2-(pyridin-2-yl)phenyl benzoate 3ja

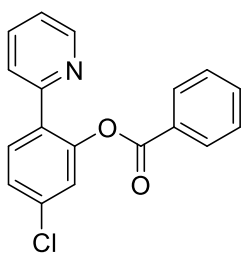

Yellow liquid.  $^1\text{H NMR}$  (300 MHz,  $\text{CDCl}_3$ ):  $\delta$  8.65–8.52 (m, 1H), 8.07 (d,  $J = 7.5$  Hz, 2H), 7.80–7.69 (m, 1H), 7.67–7.57 (m, 2H), 7.57–7.30 (m, 5H), 7.22–7.11 (m, 1H).  $^{13}\text{C NMR}$  (75 MHz,  $\text{CDCl}_3$ ):  $\delta$  164.8, 154.5, 149.7, 148.7, 136.3, 134.9, 133.7, 131.9, 131.8, 130.2, 129.2, 128.6, 126.7, 123.8, 123.6, 122.4. HRMS (APCI): Calcd for  $\text{C}_{18}\text{H}_{13}\text{NO}_2\text{Cl}$  [ $\text{M} + \text{H}$ ] $^+$  310.0634, found 310.0640.

#### 5-Bromo-2-(pyridin-2-yl)phenyl benzoate 3ka

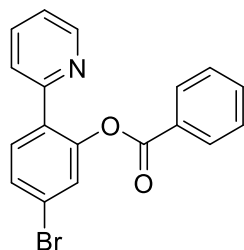

Yellow liquid.  $^1\text{H NMR}$  (300 MHz,  $\text{CDCl}_3$ ):  $\delta$  8.71–8.48 (m, 1H), 8.06 (d,  $J = 6.6$  Hz, 2H), 7.74–7.58 (m, 3H), 7.58–7.38 (m, 5H), 7.24–7.11 (m, 1H).  $^{13}\text{C NMR}$  (125 MHz,  $\text{CDCl}_3$ ):  $\delta$  163.8, 153.5, 148.7, 147.6, 135.3, 132.7, 131.3, 131.0, 129.2, 128.6, 127.9, 127.6, 125.6, 122.6, 121.6, 121.4. HRMS (APCI): Calcd for  $\text{C}_{18}\text{H}_{13}\text{NO}_2\text{Br}$   $[\text{M} + \text{H}]^+$  354.0129, found 354.0133.

### 2-(Pyridin-2-yl)-5-(trifluoromethyl)phenyl benzoate 3la

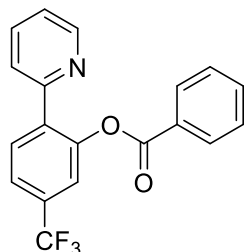

Yellow liquid.  $^1\text{H NMR}$  (300 MHz,  $\text{CDCl}_3$ ):  $\delta$  8.71–8.56 (m, 1H), 8.07 (d,  $J = 7.2$  Hz, 2H), 7.92 (d,  $J = 7.8$  Hz, 1H), 7.73–7.56 (m, 5H), 7.53–7.41 (m, 2H), 7.24–7.16 (m, 1H).  $^{13}\text{C NMR}$  (75 MHz,  $\text{CDCl}_3$ ):  $\delta$  164.8, 154.2, 149.9, 148.4, 136.8, 136.4, 133.8, 132.0, 131.6, 131.1, 130.2, 128.9, 128.6, 123.7, 123.5 (q,  $^1J_{\text{C-F}} = 271.1$  Hz), 123.1 (q,  $^3J_{\text{C-F}} = 3.4$  Hz), 122.8, 120.9 (q,  $^2J_{\text{C-F}} = 3.7$  Hz). HRMS (APCI): Calcd for  $\text{C}_{19}\text{H}_{13}\text{NO}_2\text{F}_3$   $[\text{M} + \text{H}]^+$  344.0898, found 344.0900.

### 2-(5-Bromopyridin-2-yl)phenyl benzoate 3ma

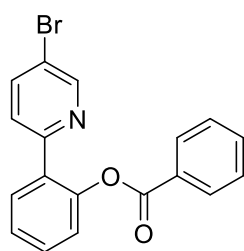

Yellow solid. Mp = 82.6–84.2 °C.  $^1\text{H NMR}$  (300 MHz,  $\text{CDCl}_3$ ):  $\delta$  8.72–8.57 (m, 1H), 8.96 (d,  $J = 7.2$  Hz, 2H), 7.86–7.68 (m, 2H), 7.67–7.56 (m, 1H), 7.55–7.23 (m, 5H), 7.33–7.23 (m, 1H).  $^{13}\text{C NMR}$  (75 MHz,  $\text{CDCl}_3$ ):  $\delta$  165.1, 154.0, 150.7, 148.2, 138.8, 133.7, 132.1, 130.8, 130.2, 129.3, 128.6, 126.6, 124.8, 123.5, 119.6. HRMS (APCI): Calcd for  $\text{C}_{18}\text{H}_{13}\text{NO}_2\text{Br}$   $[\text{M} + \text{H}]^+$  354.0129, found 354.0121.

### 3-Methyl-2-(pyrimidin-2-yl)phenyl benzoate 3na

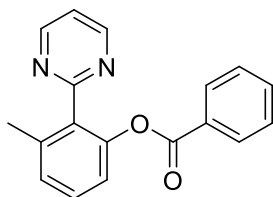

White solid. Mp = 83–84 °C.  $^1\text{H NMR}$  (300 MHz,  $\text{CDCl}_3$ ):  $\delta$  8.82–8.67 (m, 2H), 7.95–7.84 (m, 2H), 7.60–7.48 (m, 1H), 7.45–7.32 (m, 3H), 7.26–7.18 (m, 2H), 7.18–7.11 (m, 1H), 2.28 (s, 3H).  $^{13}\text{C NMR}$  (75 MHz,  $\text{CDCl}_3$ ):  $\delta$  163.9, 163.8, 155.9, 147.8, 137.1, 132.2, 131.0, 128.9, 128.4, 128.4, 127.8, 127.3, 127.1, 119.5, 118.0, 18.8. HRMS (APCI): Calcd for  $\text{C}_{18}\text{H}_{15}\text{N}_2\text{O}_2$   $[\text{M} + \text{H}]^+$  291.1133, found 291.1130.

#### 4-Methyl-2-(pyrimidin-2-yl)phenyl benzoate 3oa

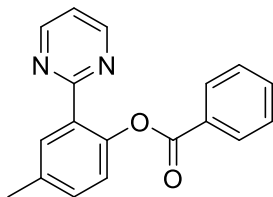

Yellow liquid.  $^1\text{H NMR}$  (300 MHz,  $\text{CDCl}_3$ ):  $\delta$  8.61 (d,  $J$  = 4.8 Hz, 2H), 8.15 (d,  $J$  = 7.5 Hz, 2H), 8.05 (s, 1H), 7.67–7.55 (m, 1H), 7.54–7.42 (m, 2H), 7.40–7.31 (m, 1H), 7.23–7.15 (m, 1H), 7.09 (t,  $J$  = 5.1 Hz, 1H), 2.46 (s, 3H).  $^{13}\text{C NMR}$  (75 MHz,  $\text{CDCl}_3$ ):  $\delta$  165.0, 162.9, 155.9, 146.4, 135.0, 132.5, 132.0, 131.0, 130.8, 129.2, 129.1, 127.4, 127.3, 122.8, 117.9, 19.9. HRMS (APCI): Calcd for  $\text{C}_{18}\text{H}_{15}\text{N}_2\text{O}_2$   $[\text{M} + \text{H}]^+$  291.1133, found 291.1128.

## Intermolecular Competition Experiments

(a) intermolecular competition experiments between acids **2**

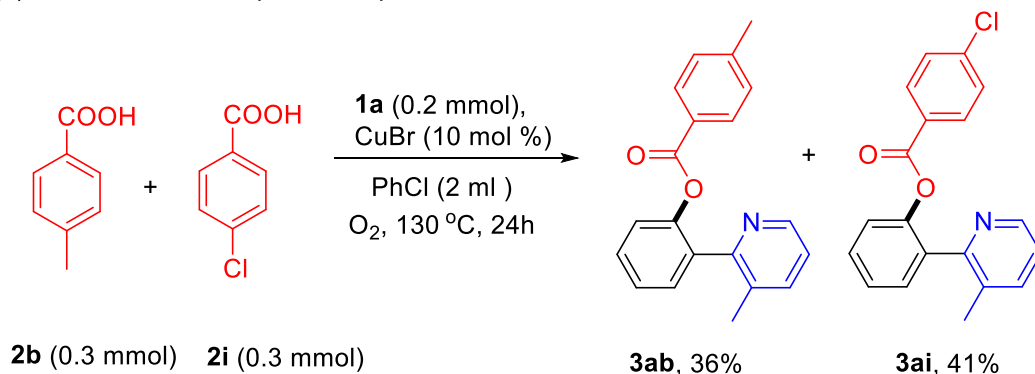

### Scheme S1

To a 10 mL reaction tube was added 3-methyl-2-phenylpyridine **1a** (0.2 mmol), *p*-toluylic acid **2b** (0.3 mmol), *p*-chlorobenzoic acid **2i** (0.3 mmol), CuBr (2.9 mg, 10 mol %), and chlorobenzene (2 mL) under oxygen atmosphere. The mixture was stirred at 130 °C for 24 h. The reaction mixture was then cooled to room temperature, diluted with ethyl acetate and quenched with saturated sodium chloride. The aqueous phase was extracted with ethyl acetate (3 × 10 mL). The organic layer was dried over Na<sub>2</sub>SO<sub>4</sub>. After concentration, the resulting residue was purified by flash chromatography to afford the product **3ab** (21.8 mg, 36%) and **3ai** (26.5 mg, 41%).

(b) intermolecular competition experiments between arenes **1**

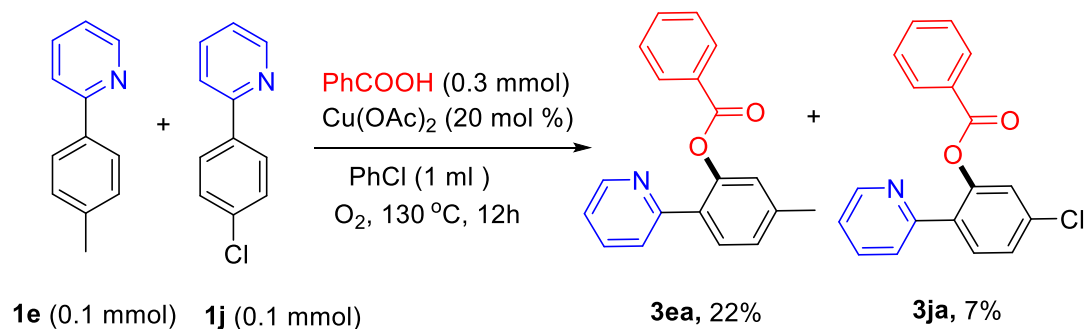

### Scheme S2

To a 10 mL reaction tube was added 2-(*p*-tolyl)pyridine **1e** (0.1 mmol), 2-(4-chlorophenyl)pyridine **1j** (0.1 mmol), benzoic acid **2a** (0.3 mmol), Cu(OAc)<sub>2</sub> (3.6 mg, 20 mol %), and chlorobenzene (1 mL) under oxygen atmosphere. The mixture was stirred at 130 °C for 12 h. The reaction mixture was then cooled to room temperature, diluted with ethyl acetate and quenched with saturated sodium chloride. The aqueous phase was extracted with ethyl acetate (3 × 10 mL). The organic layer was dried over Na<sub>2</sub>SO<sub>4</sub>. After concentration, the resulting residue was purified by flash chromatography to afford the product **3ea** (6.4 mg, 22%) and **3ja** (2.3 mg, 7%).

## Control Experiments

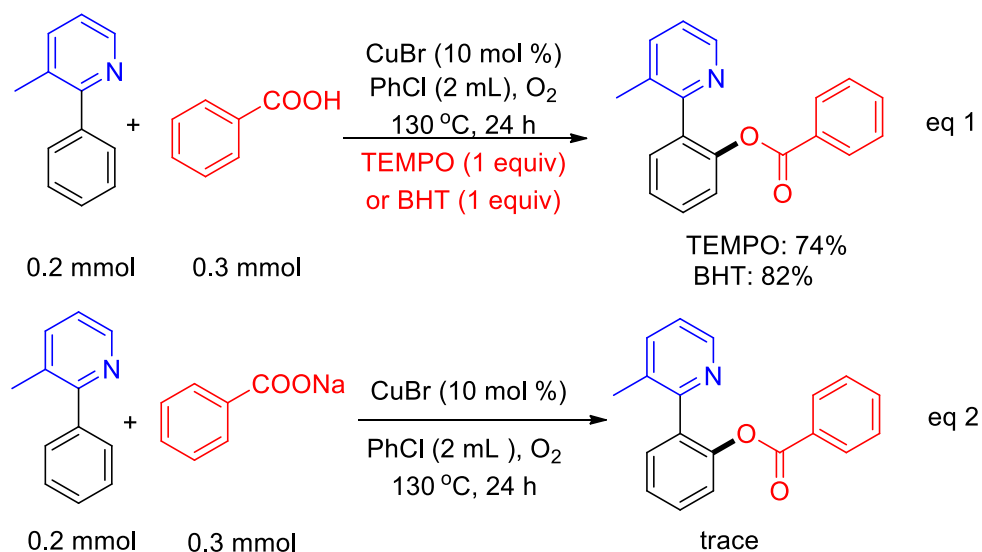

Scheme S3

## Isotopic Labeling Experiments

To a 10 mL reaction tube was added [D]<sub>5</sub>-**1b** (0.2 mmol), benzoic acid **2a** (0.3 mmol), Cu(OAc)<sub>2</sub> (3.6 mg, 20 mol %), and chlorobenzene (1 mL) under oxygen atmosphere. The mixture was stirred at 130 °C for 24 h. The reaction mixture was then cooled to room temperature, diluted with ethyl acetate and quenched with saturated sodium chloride. The aqueous phase was extracted with ethyl acetate (3×10 mL). The organic layer was dried over Na<sub>2</sub>SO<sub>4</sub>. After concentration, the resulting residue was purified by flash chromatography on silica gel (eluent: petroleum ether/ethyl acetate = 12/1) to afford the product. <sup>1</sup>H NMR (300 MHz, CDCl<sub>3</sub>): δ 8.61 (d, *J* = 4.5 Hz, 1H), 8.09 (d, *J* = 7.5 Hz, 2H), 7.79 (s, 0.57 H), 7.68–7.53 (m, 3H), 7.51–7.41 (m, 2H), 7.21–7.12 (m, 1H).

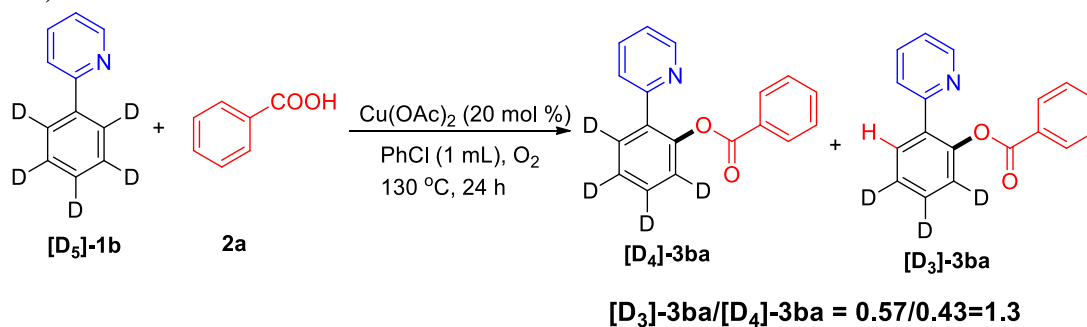

Scheme S4

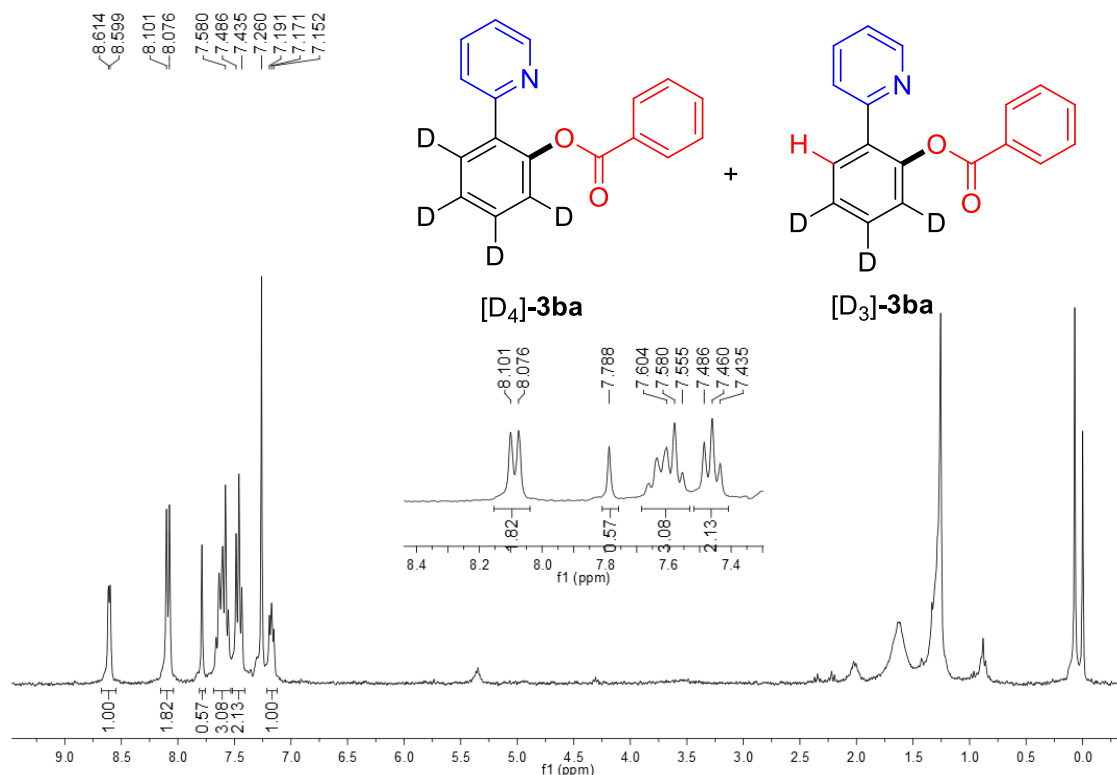

**Figure S1**

### Kinetic Isotop Effect Experiments

To a 10 mL reaction tube was added **1b** (0.1 mmol),  $[D]_5\text{-1b}$  (0.1 mmol), pivalic acid **2r** (0.3 mmol),  $\text{Cu}(\text{OAc})_2$  (3.6 mg, 20 mol %), and chlorobenzene (1 mL) under oxygen atmosphere. The mixture was stirred at 130 °C for 24 h. The reaction mixture was then cooled to room temperature, diluted with ethyl acetate and quenched with saturated sodium chloride. The aqueous phase was extracted with ethyl acetate (3×10 mL). The organic layer was dried over  $\text{Na}_2\text{SO}_4$ . After concentration, the resulting residue was purified by flash chromatography on silica gel (eluent: petroleum ether/ethyl acetate = 12/1) to afford the product.  $^1\text{H NMR}$  (300 MHz,  $\text{CDCl}_3$ ):  $\delta$  8.69 (d,  $J = 4.2$  Hz, 1H), 7.77–7.67 (m, 1H), 7.67–7.61 (m, 0.77H), 7.53–7.46 (m, 1H), 7.46–7.38 (m, 1H), 7.37–7.30 (m, 1H), 7.25–7.20 (m, 1H), 7.15–7.07 (m, 0.74H), 1.20 (s, 9H).

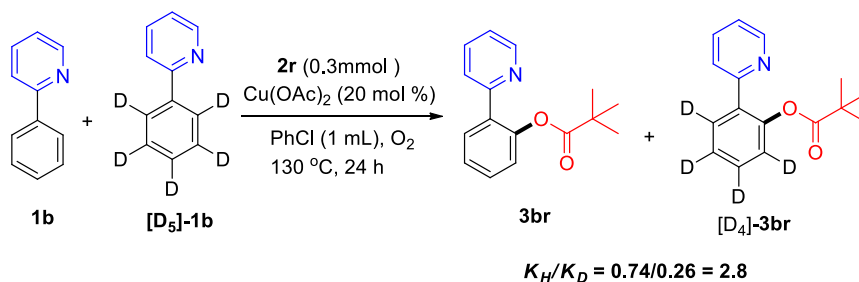

**Scheme S5**



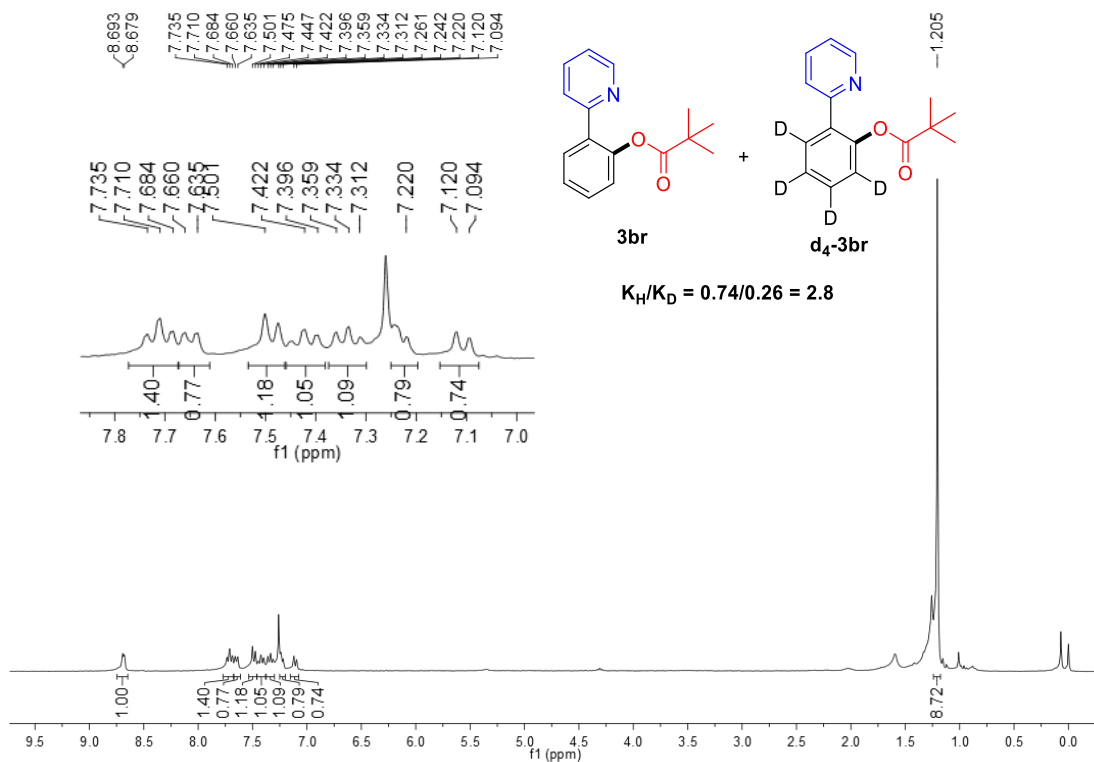

Figure S2

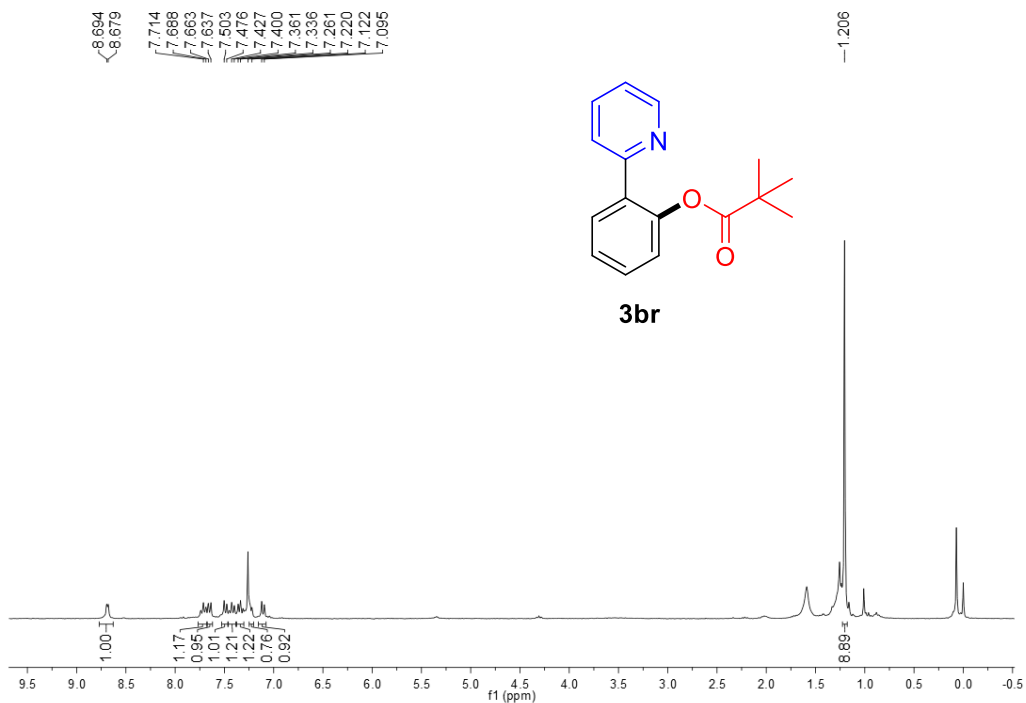

Figure S3

# Copies of $^1\text{H}$ and $^{13}\text{C}$ NMR Spectra

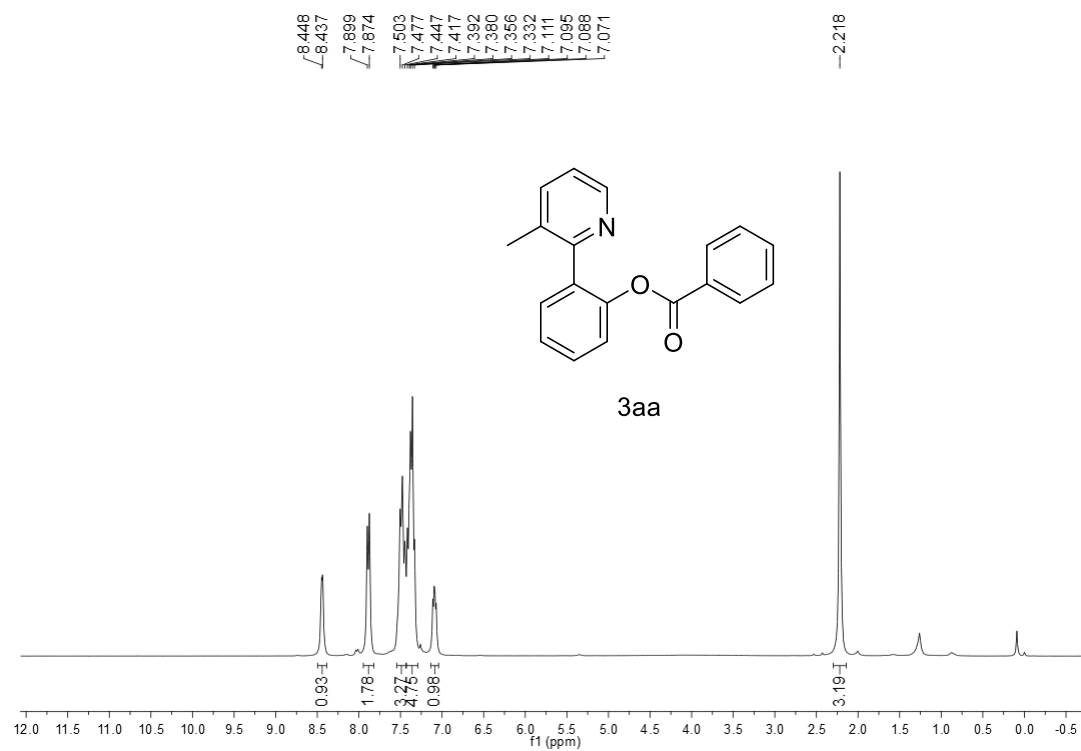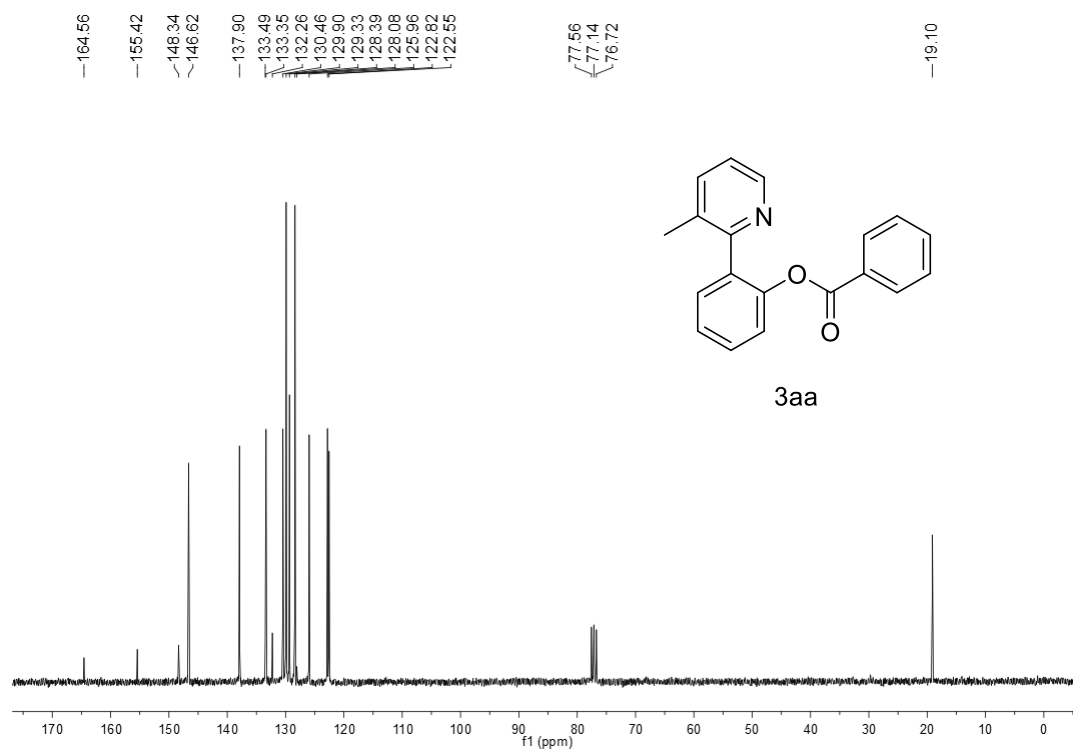

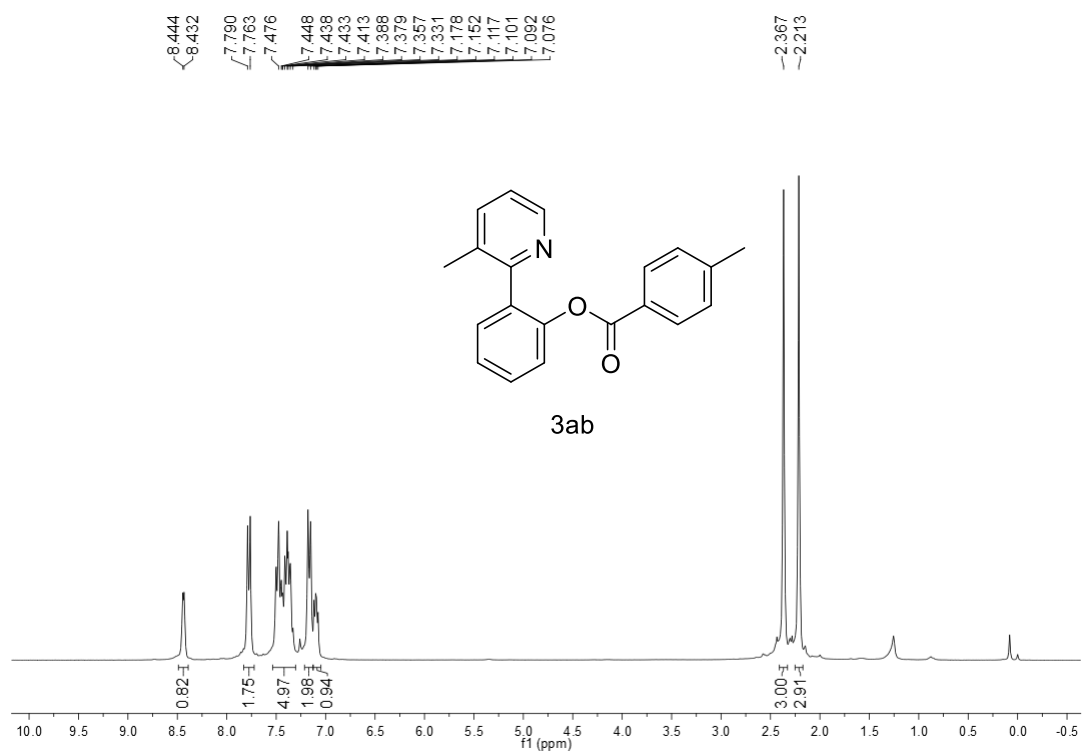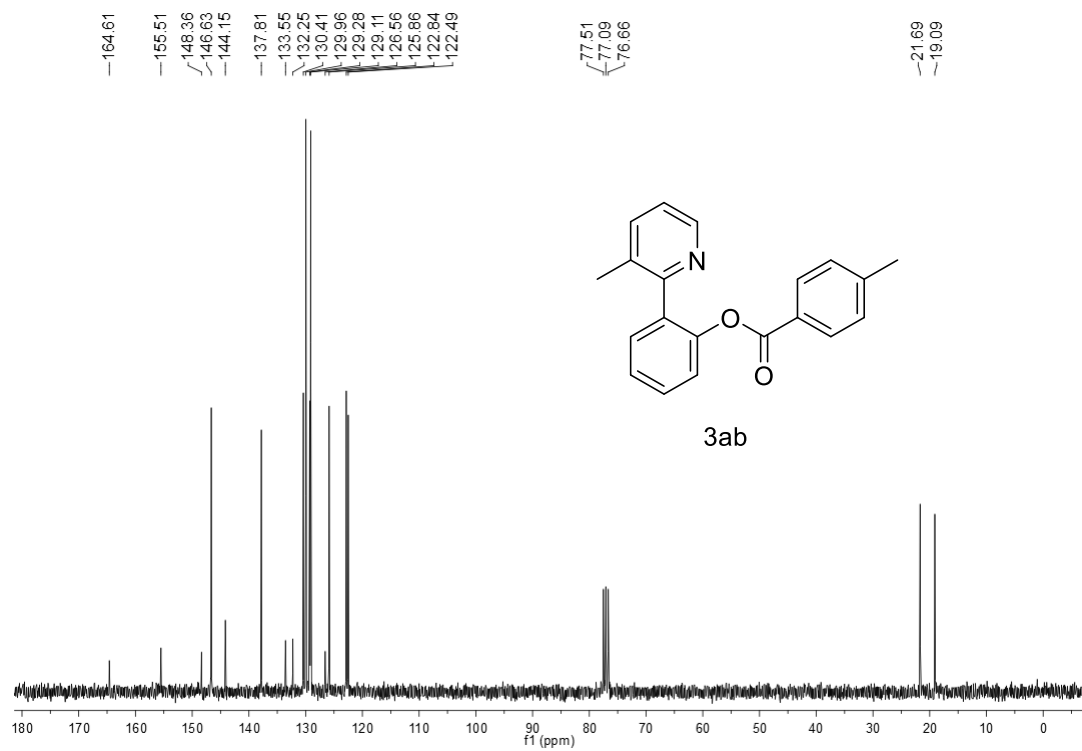

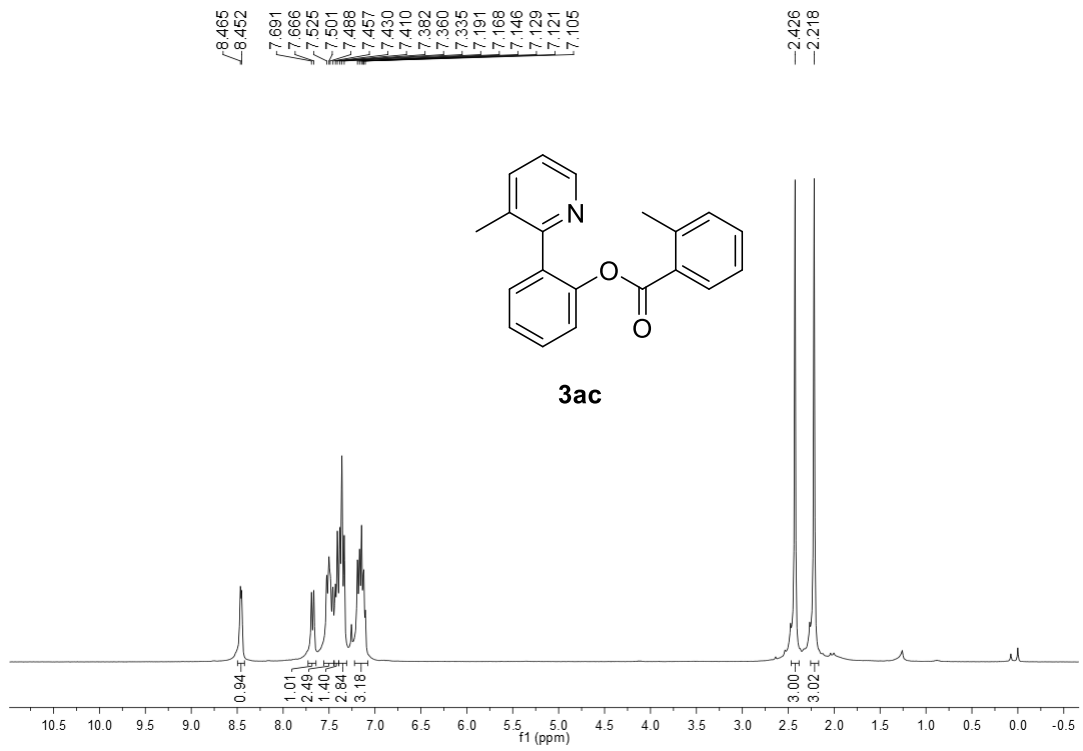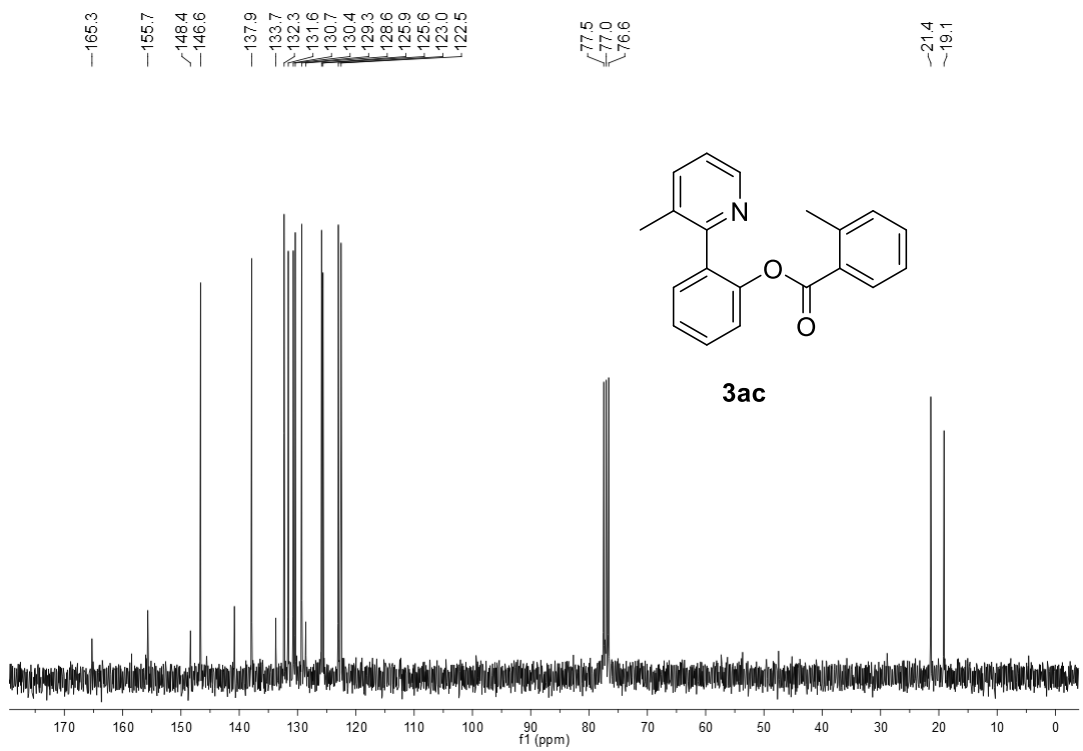

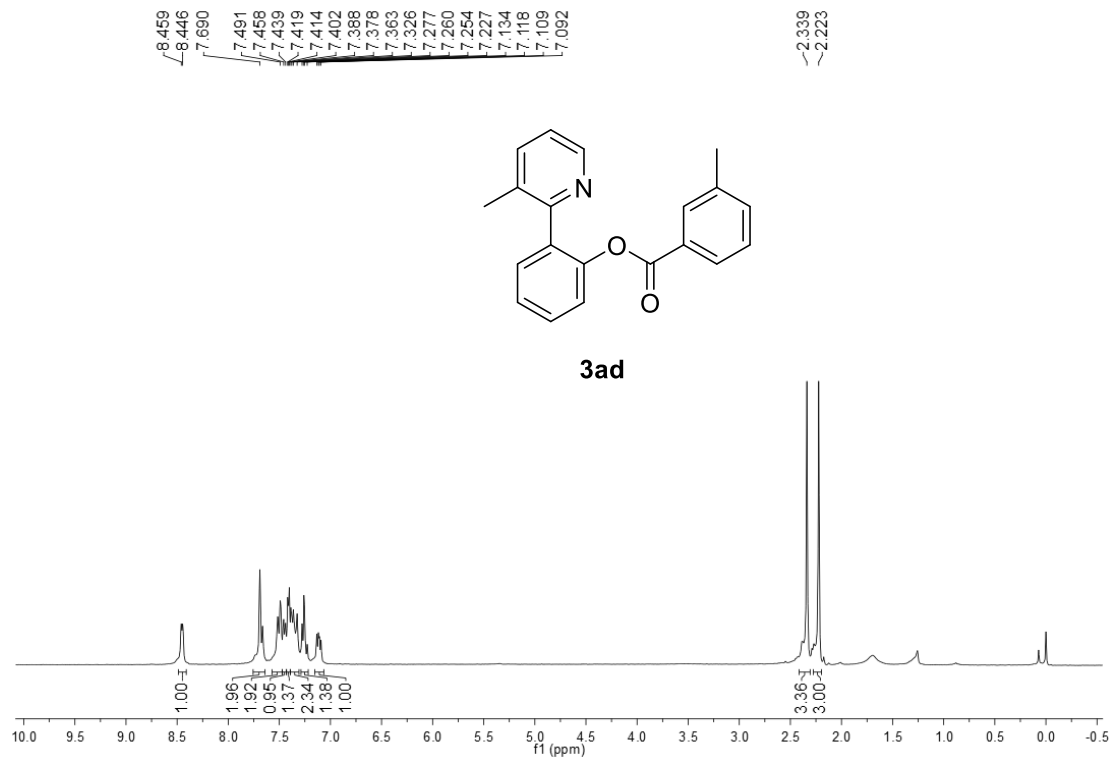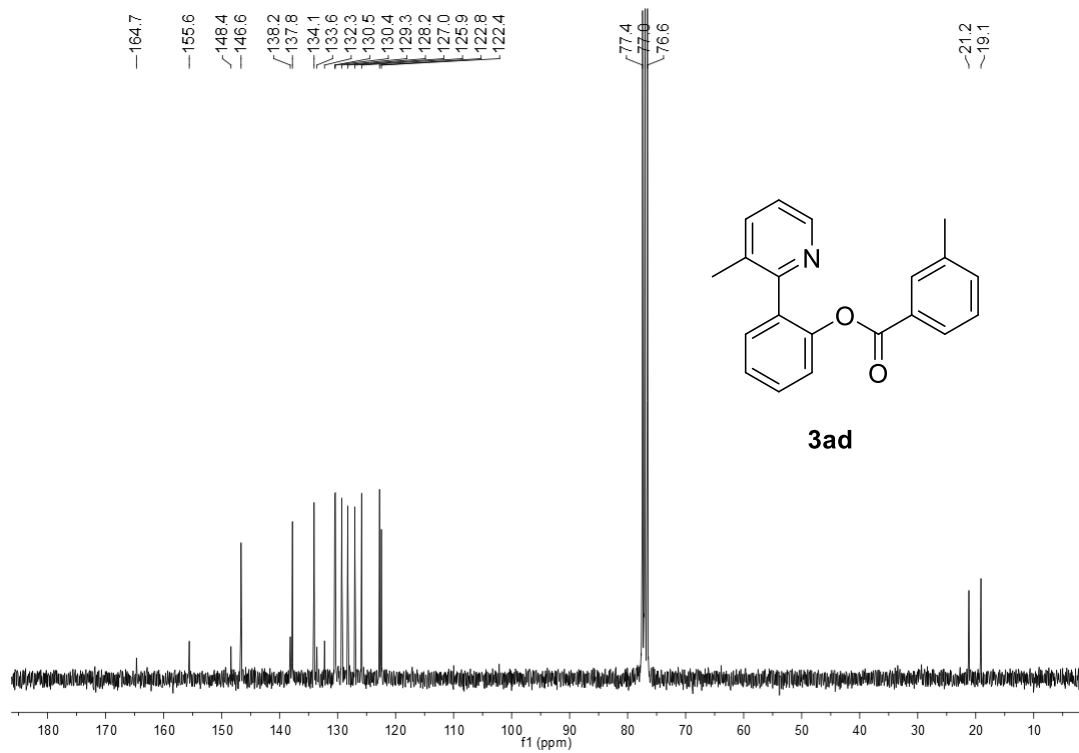

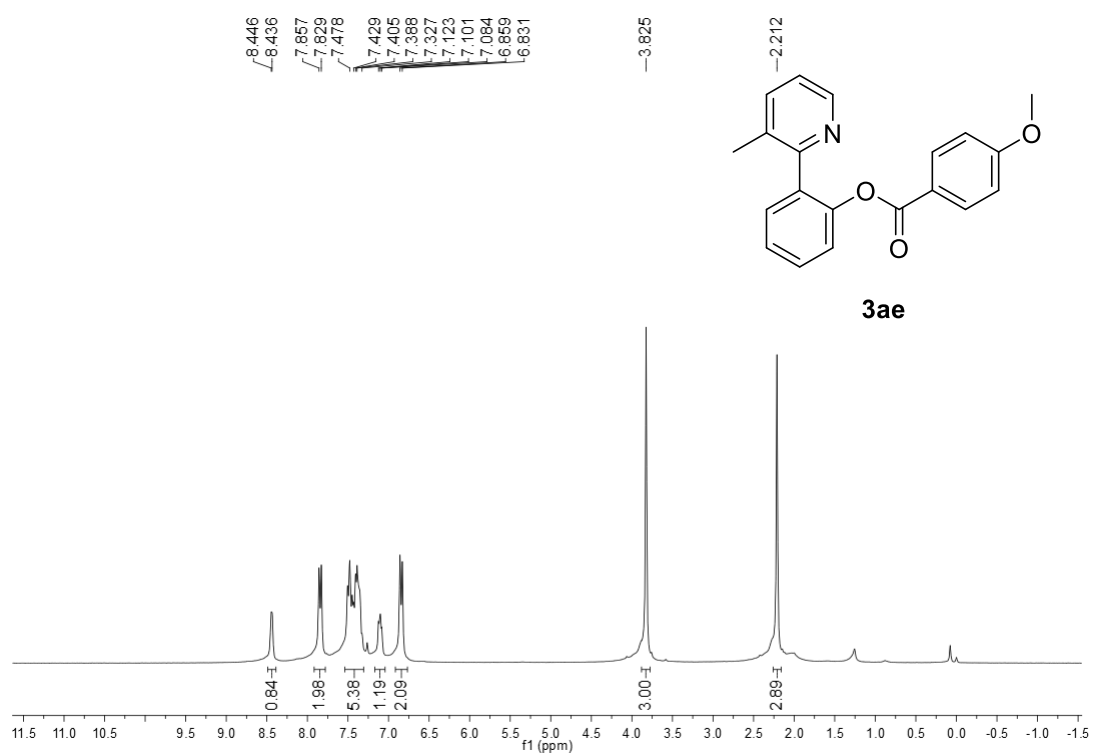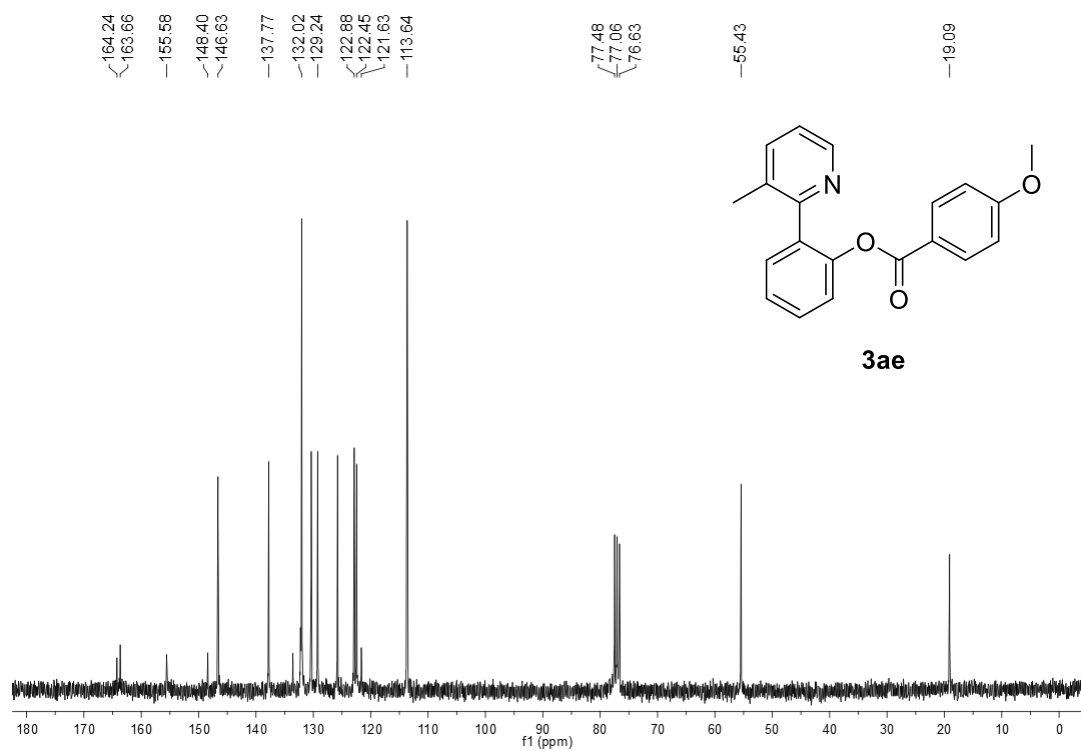

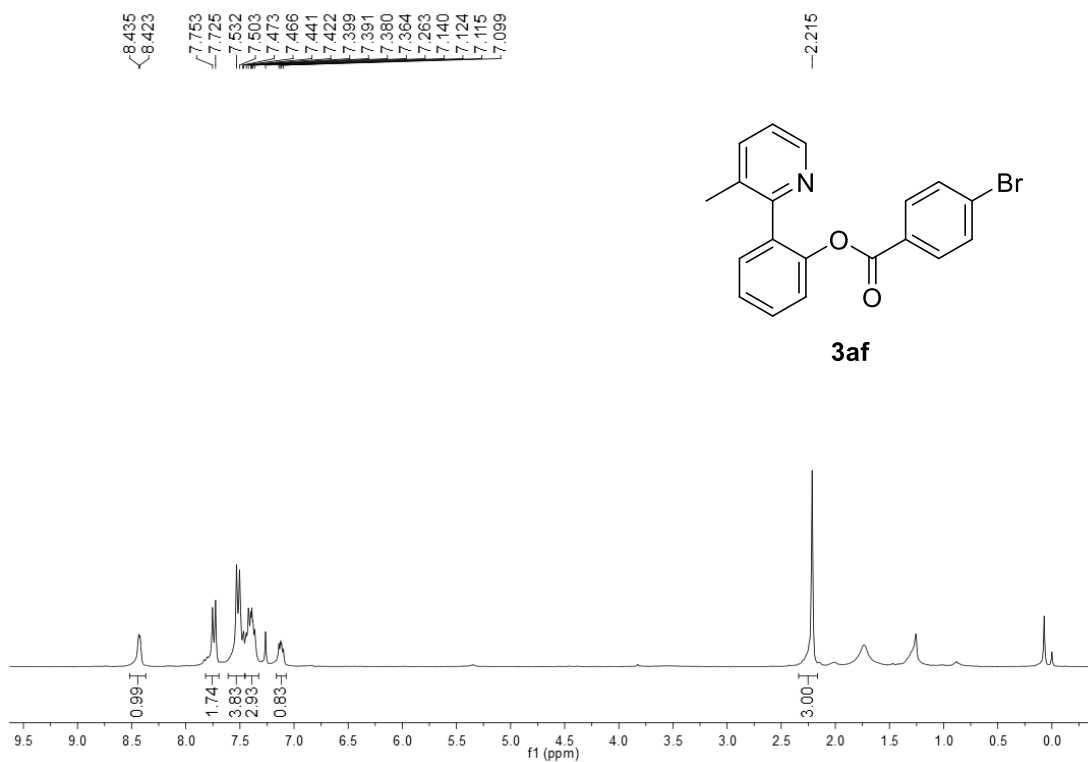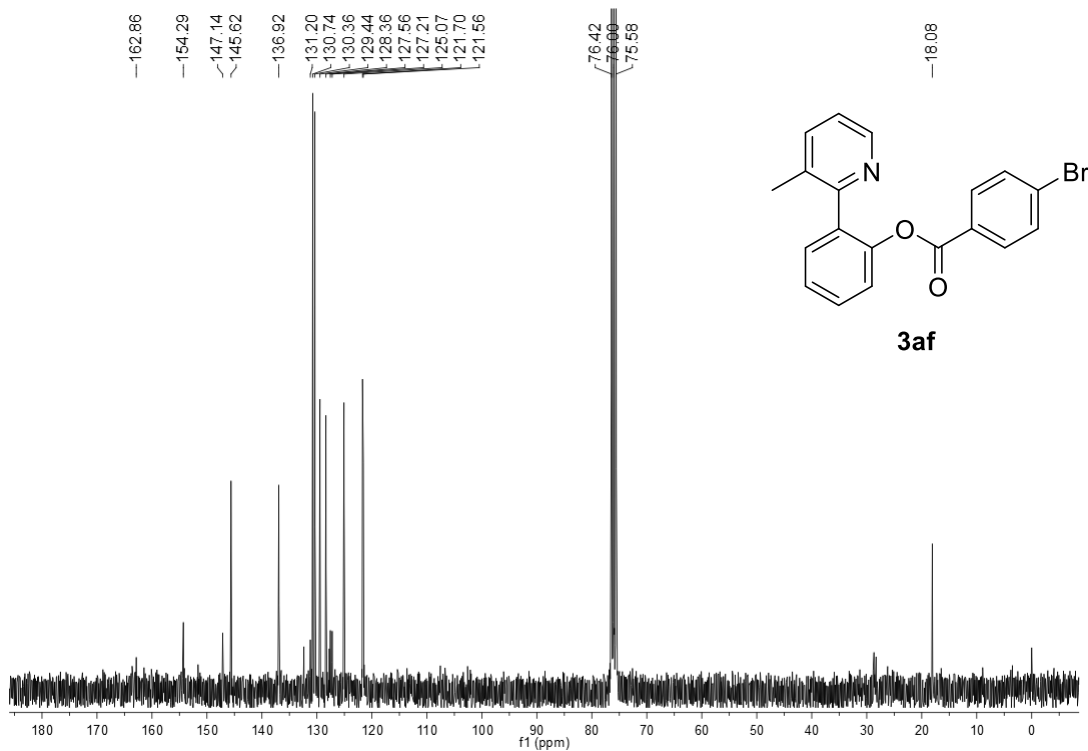

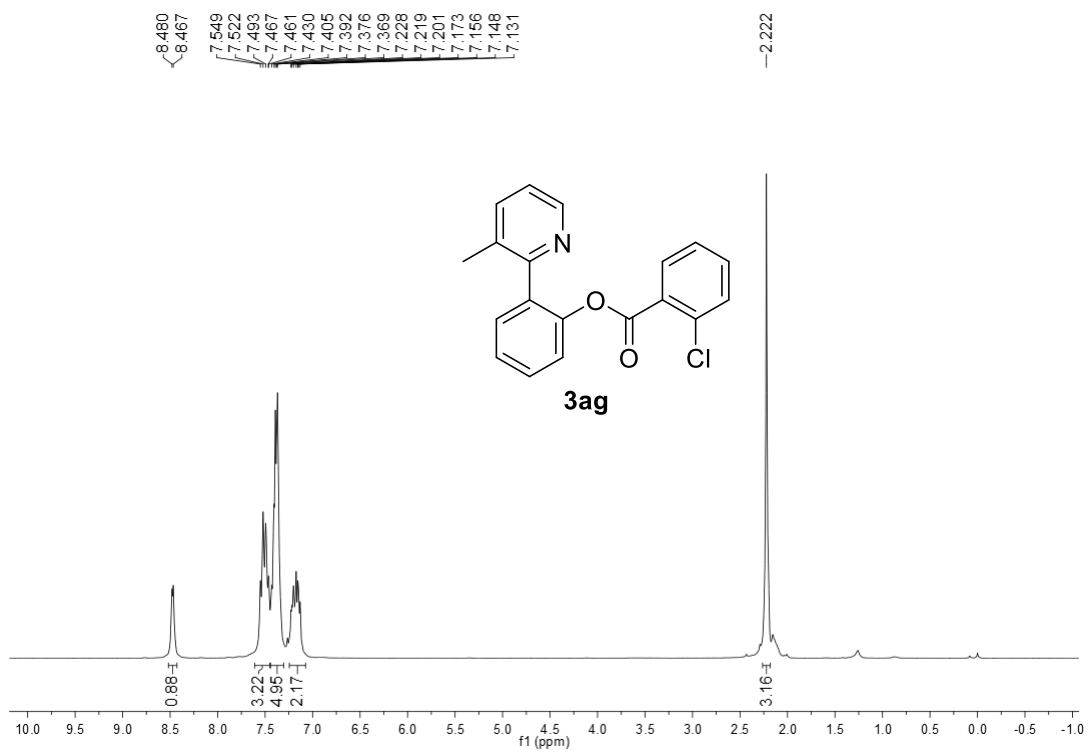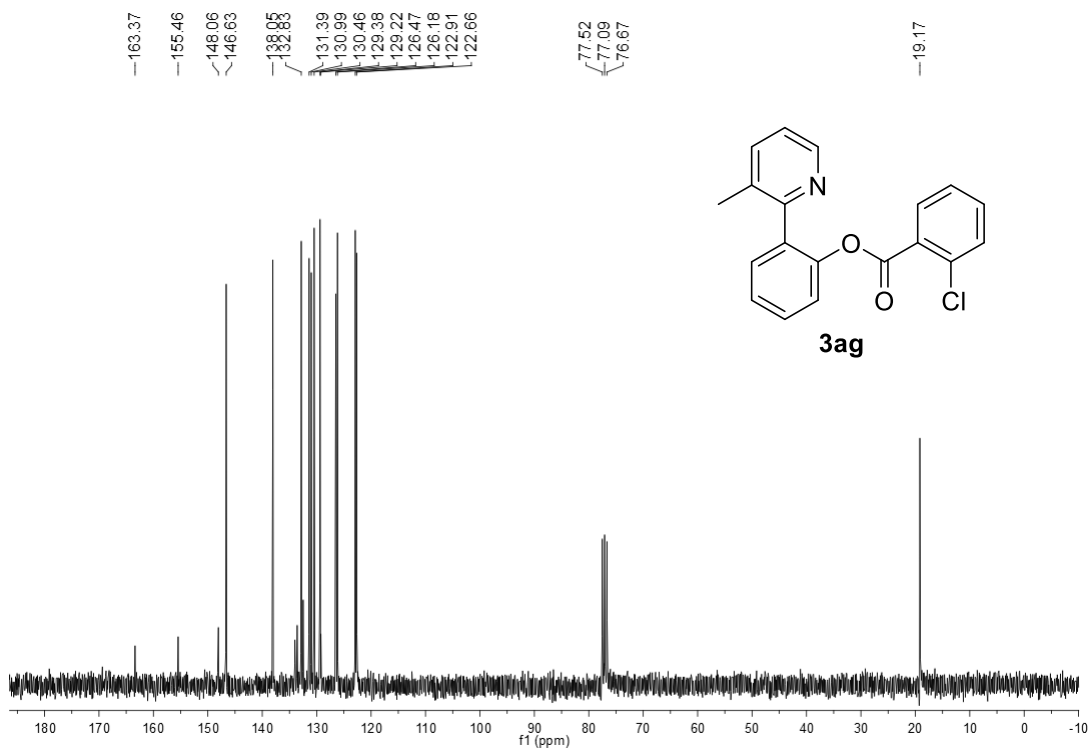



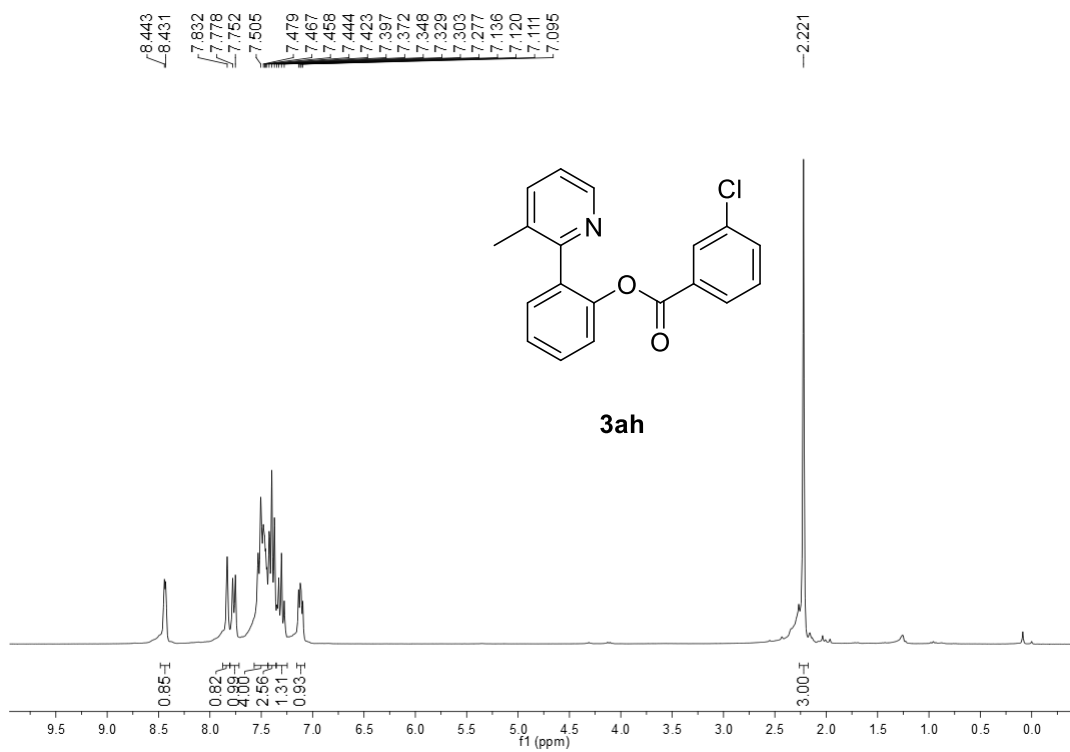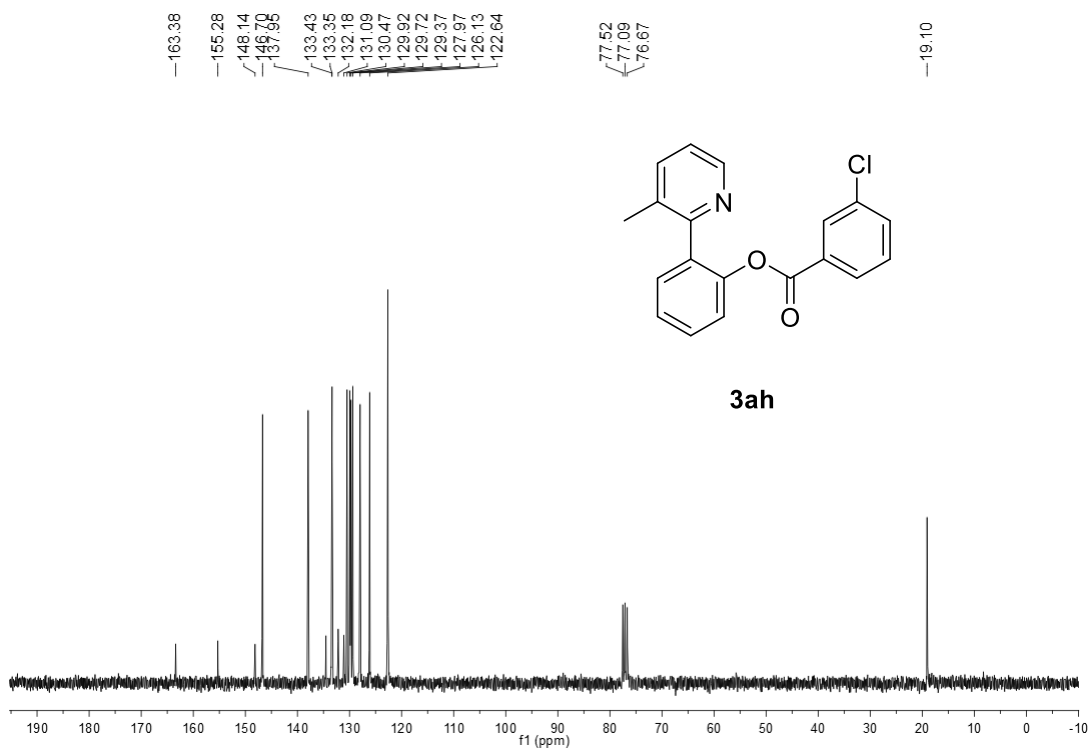

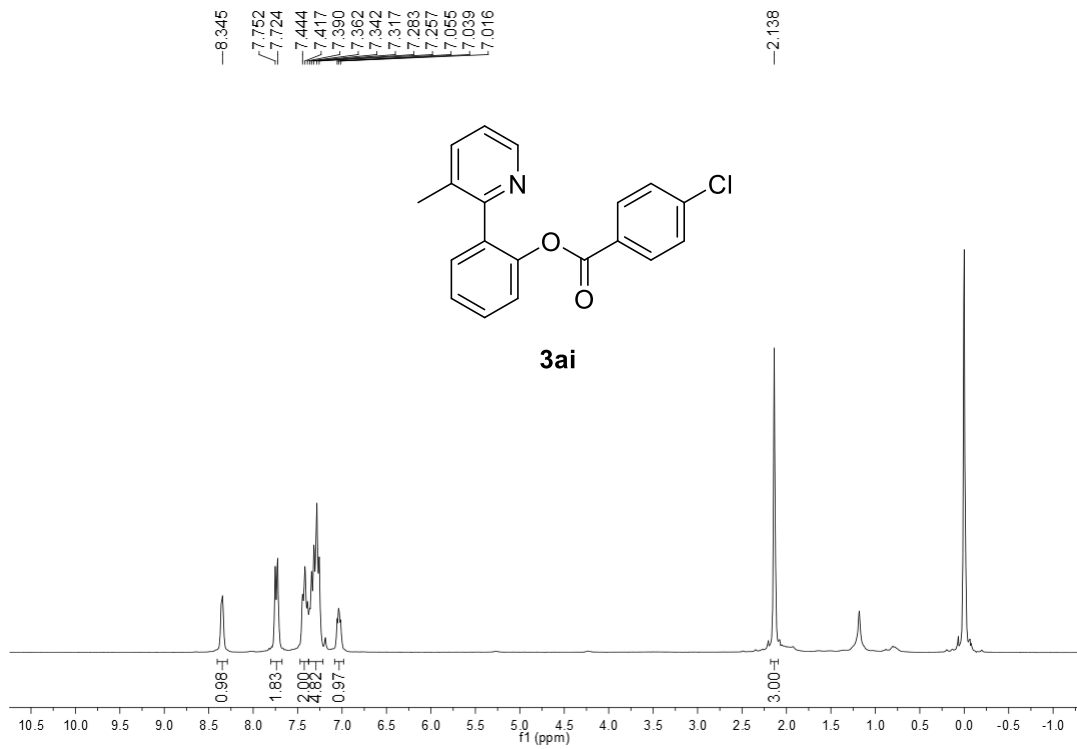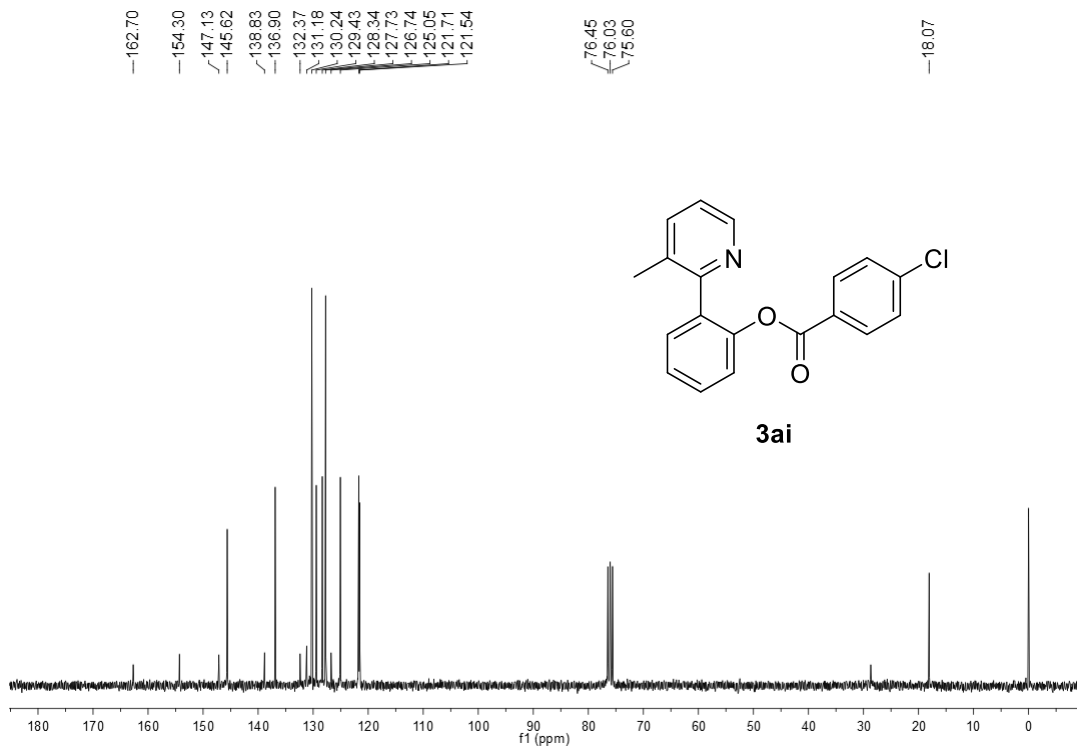

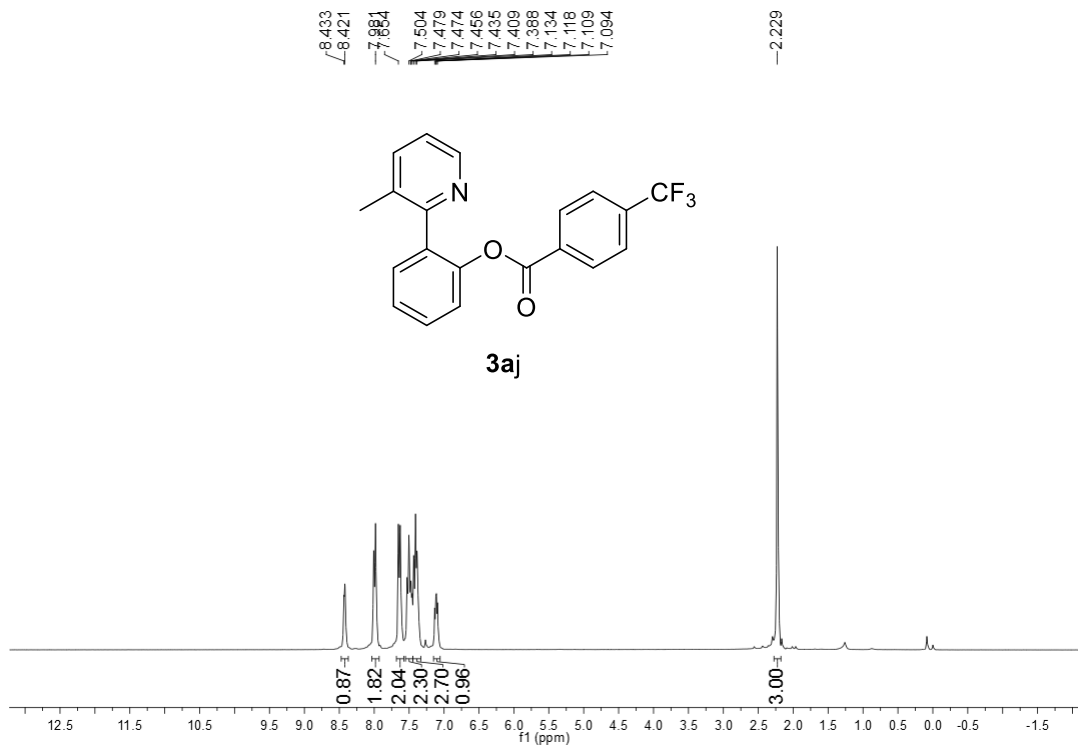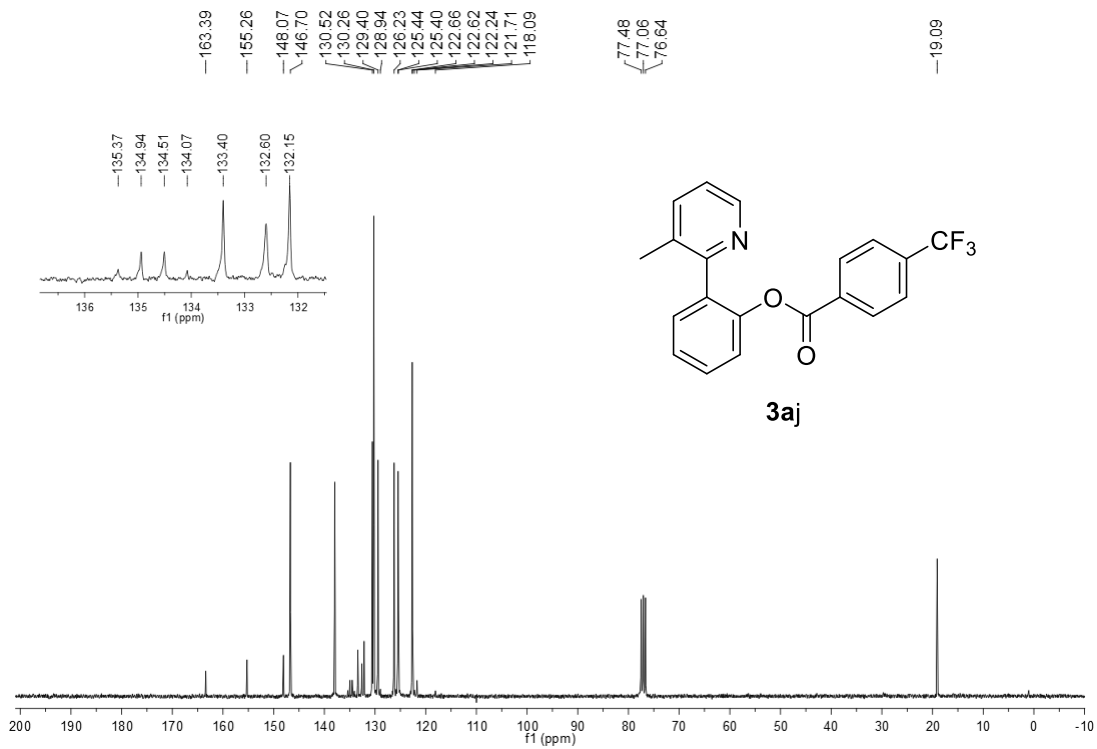

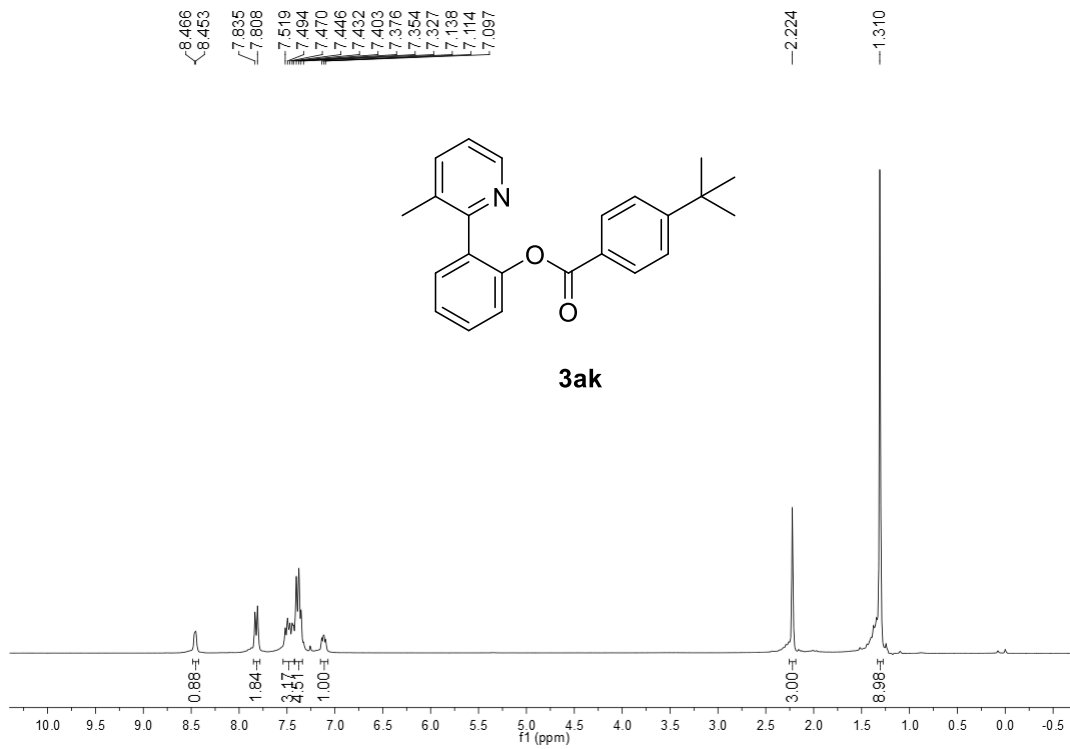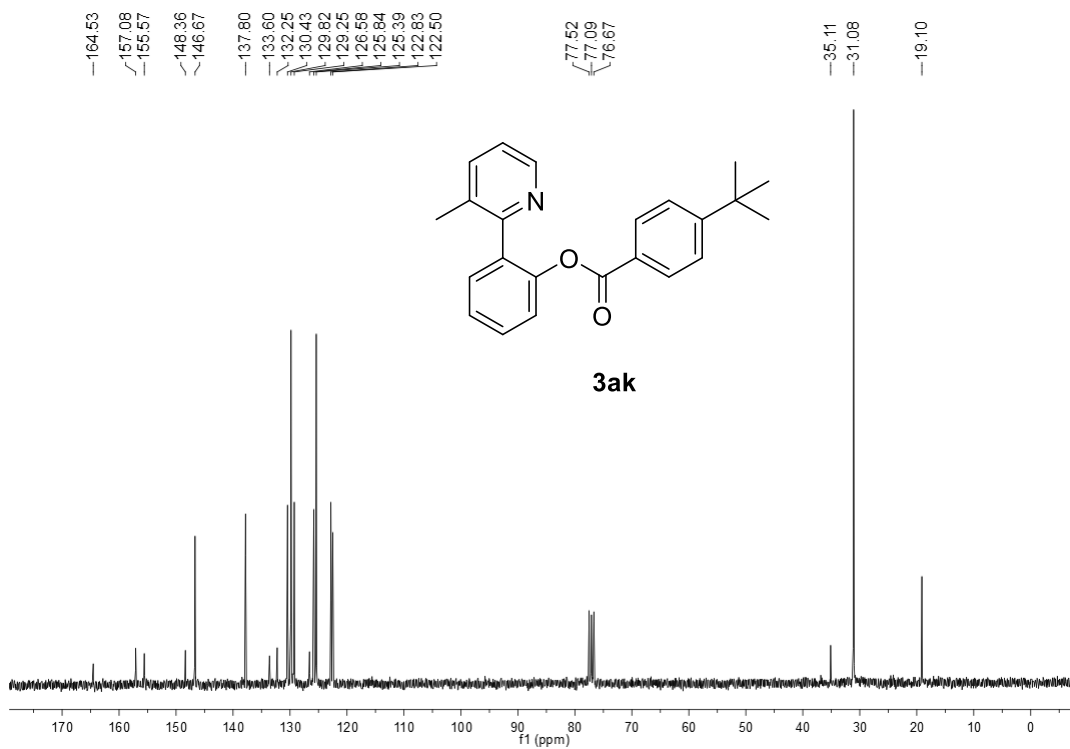

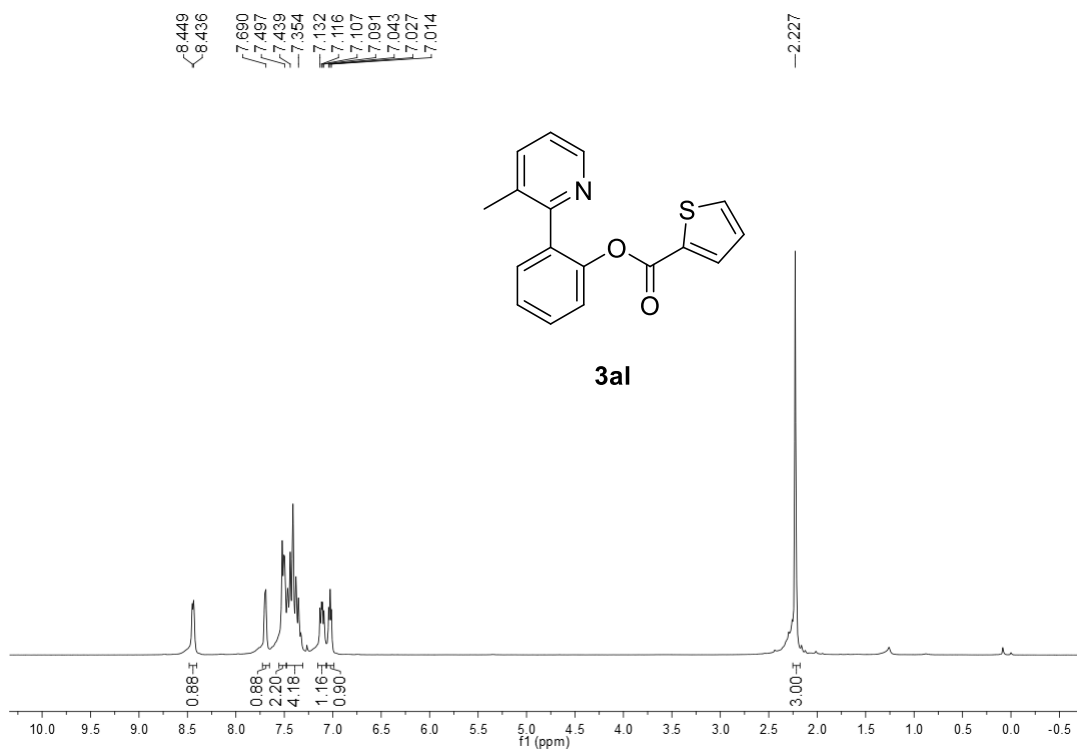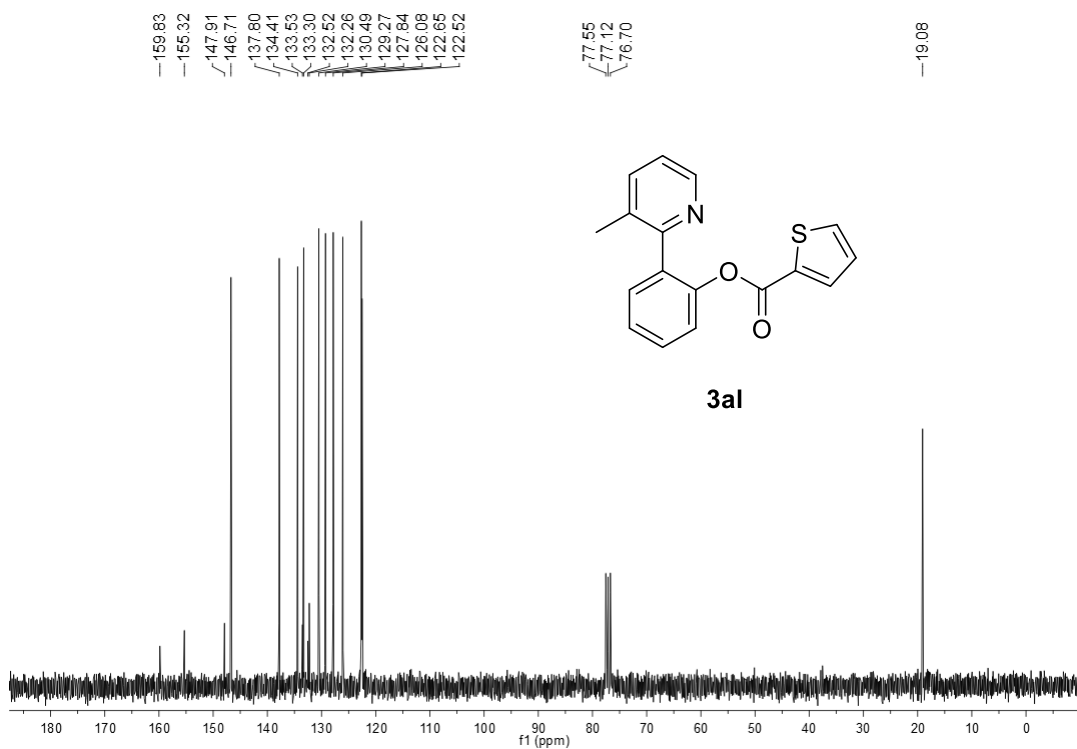

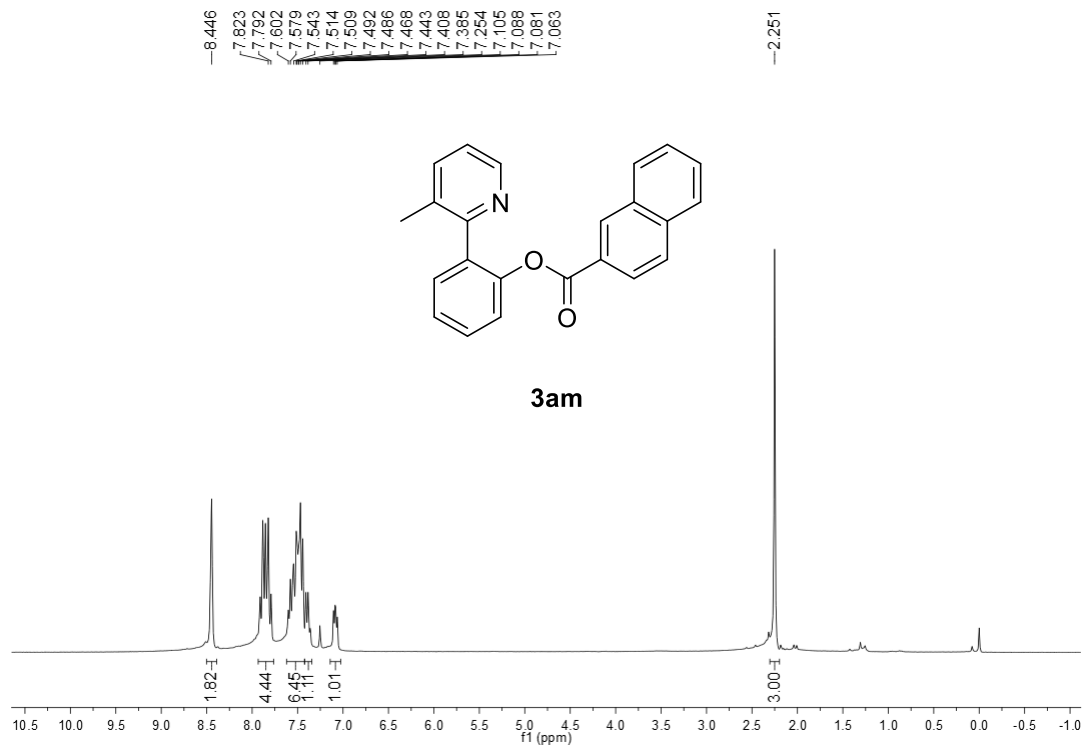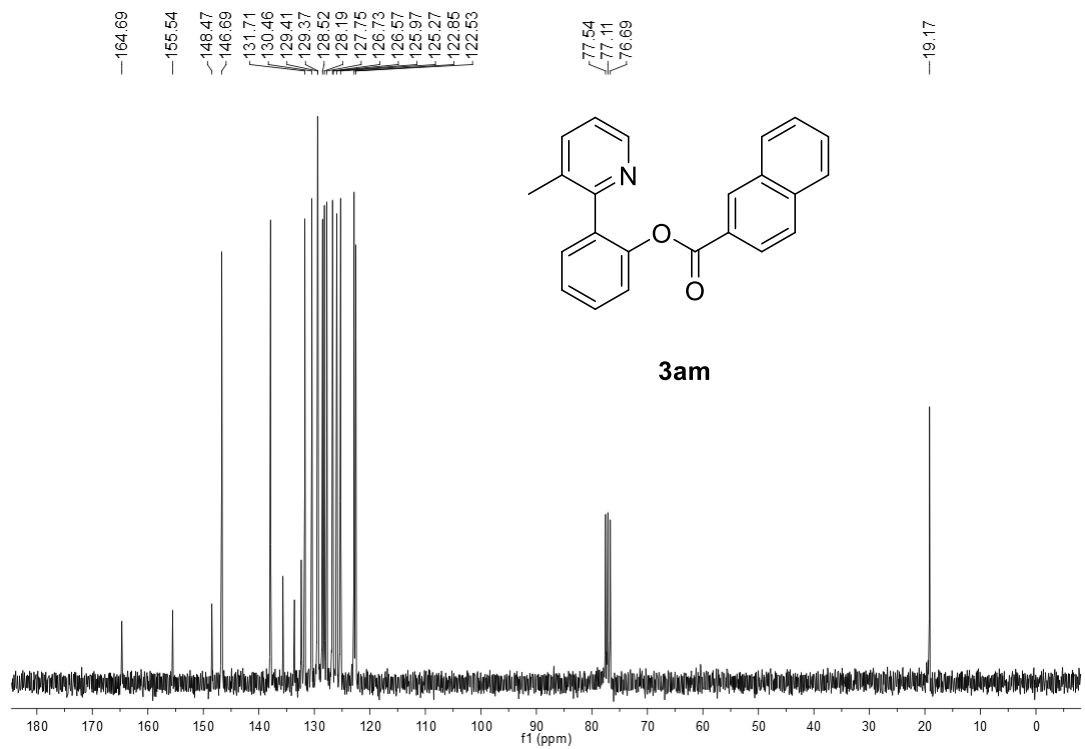

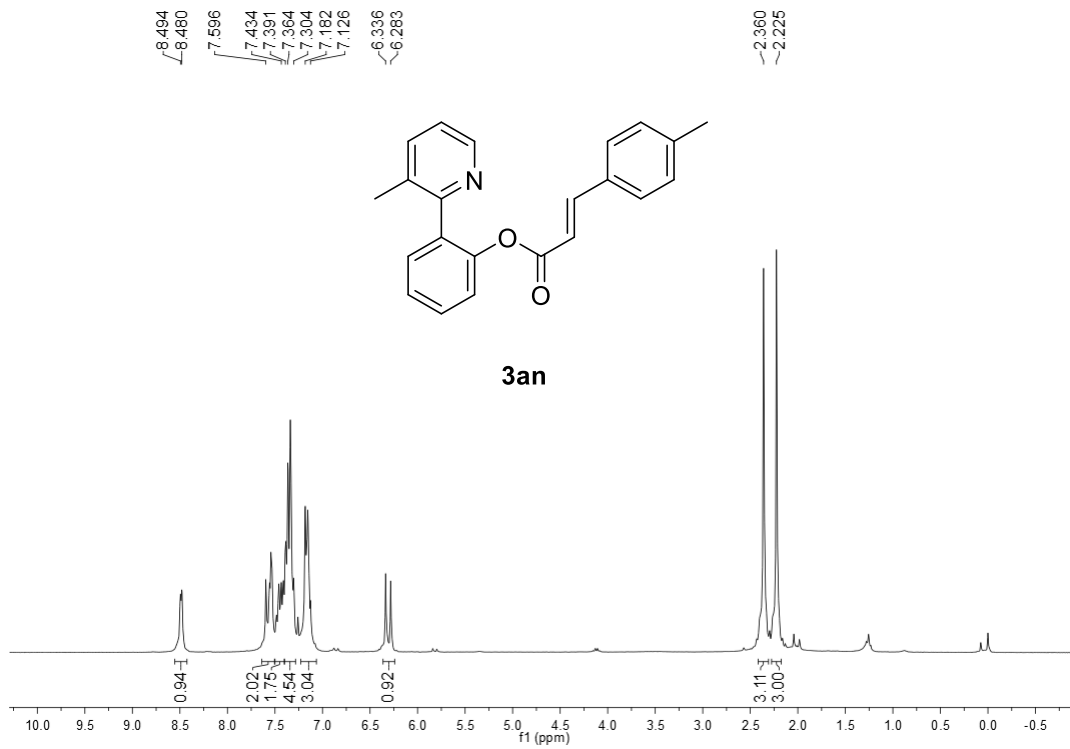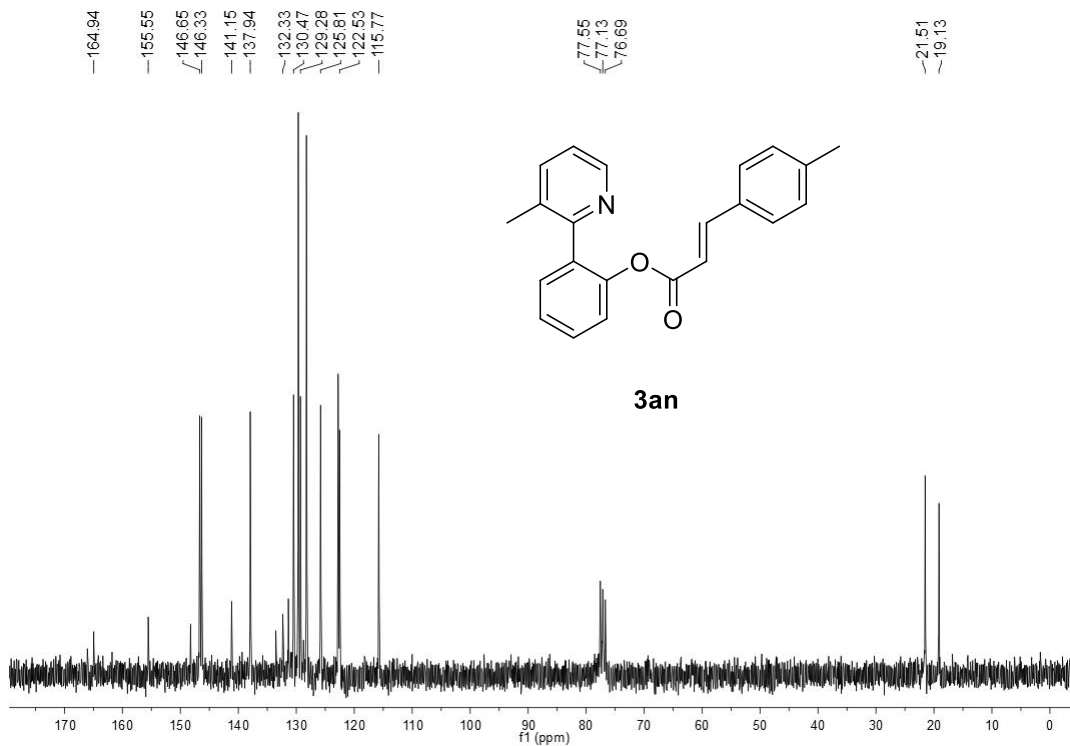

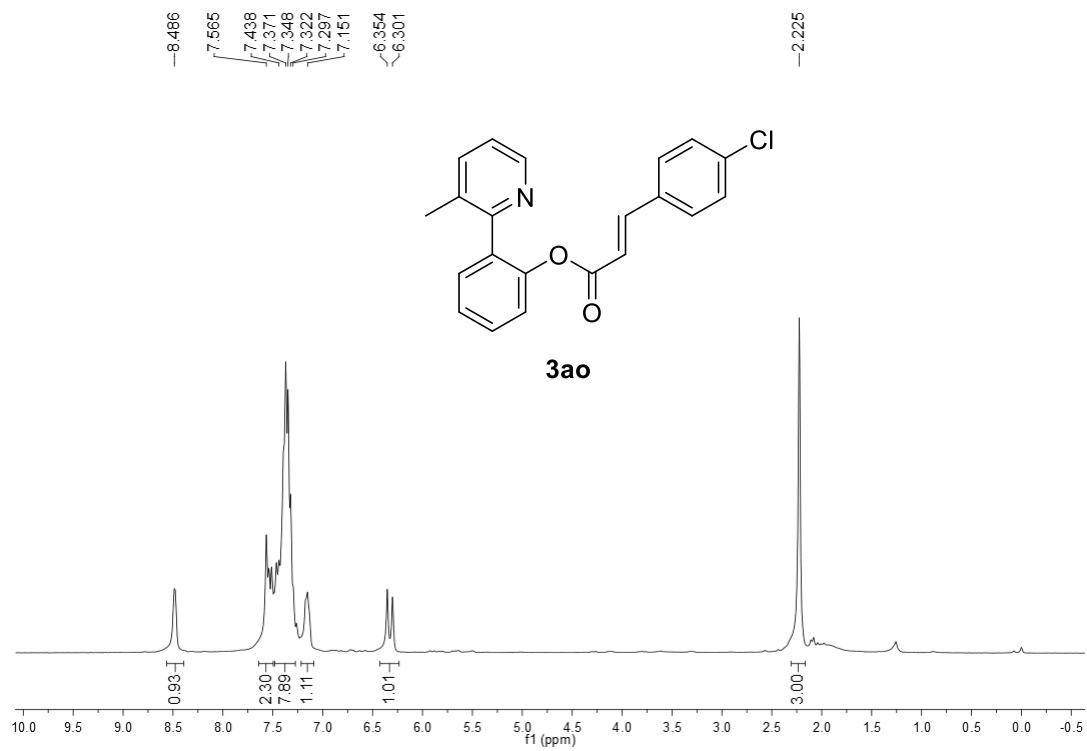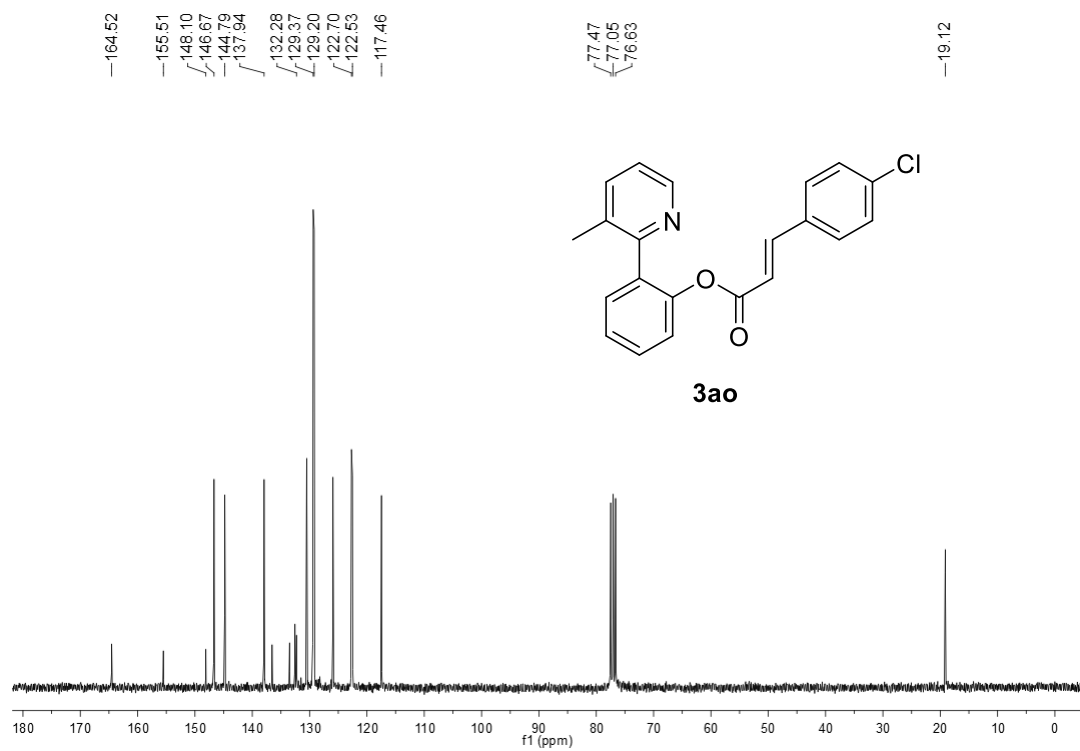



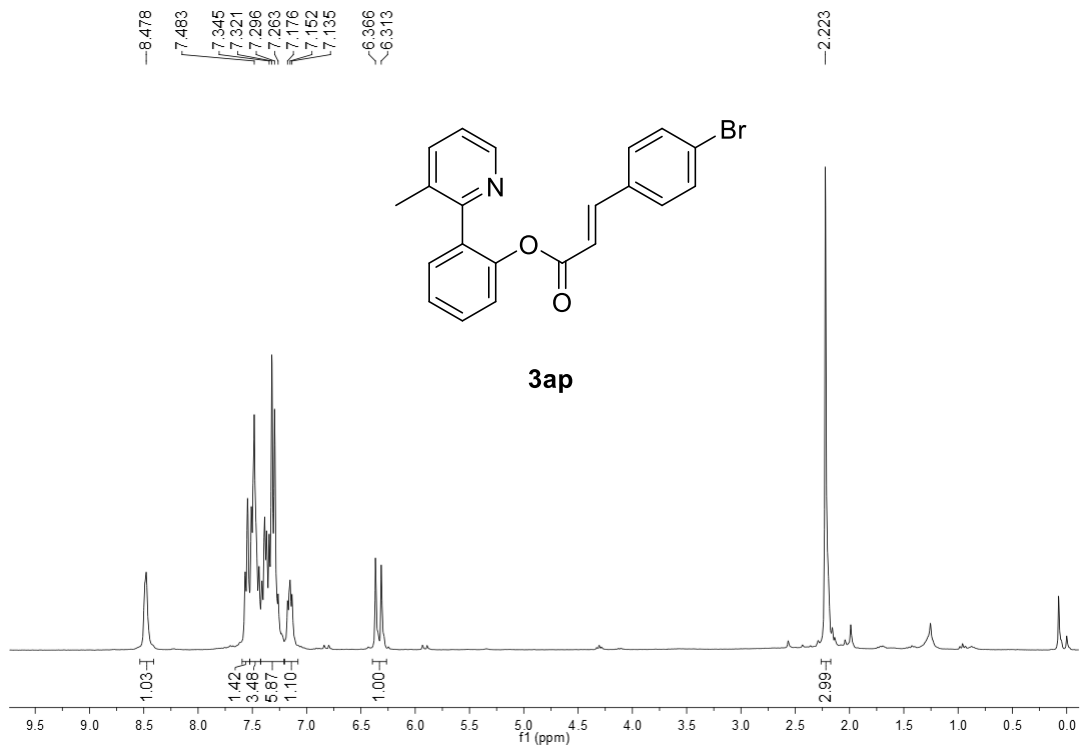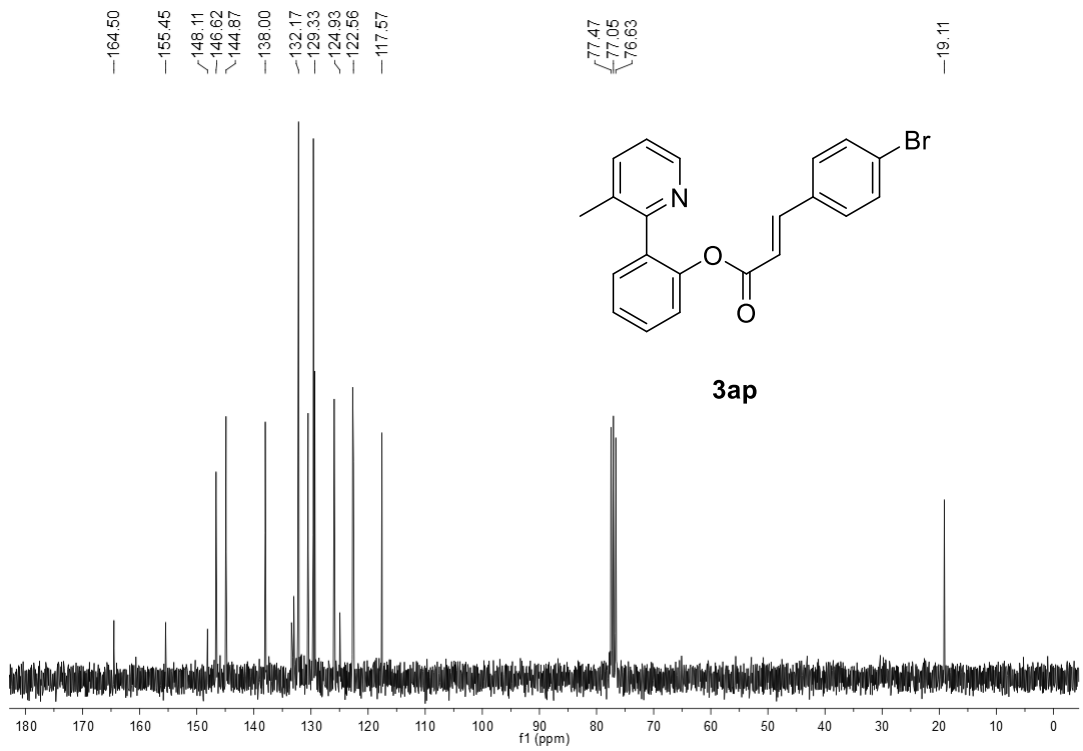

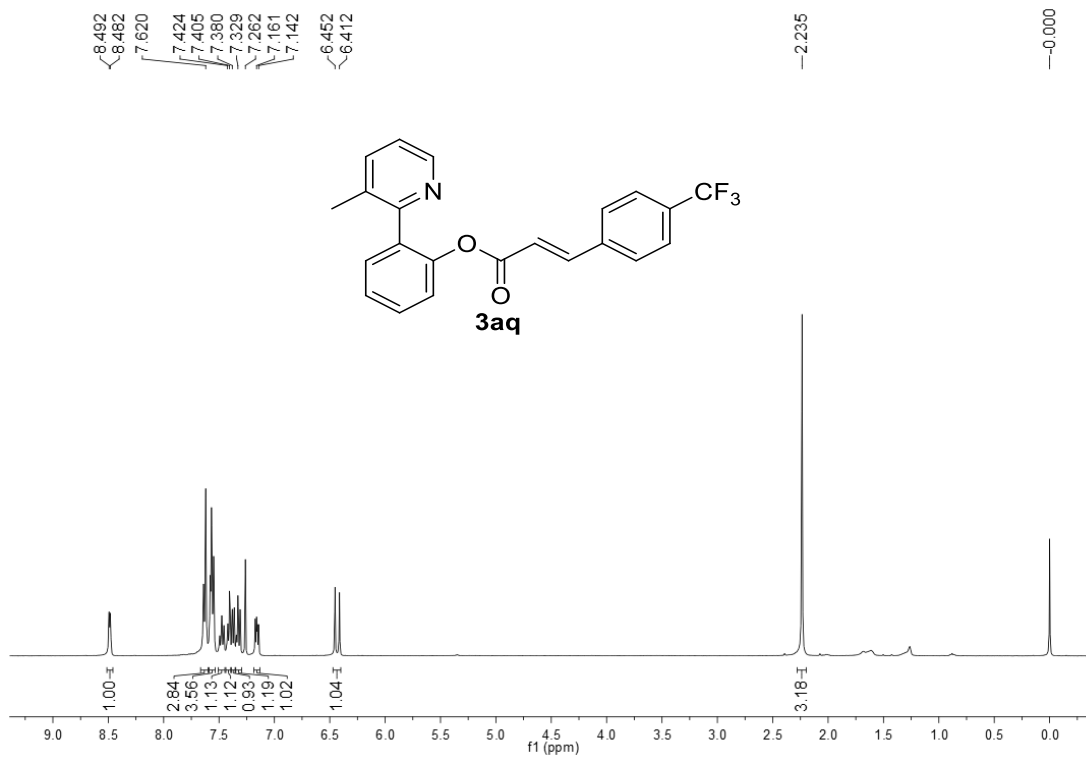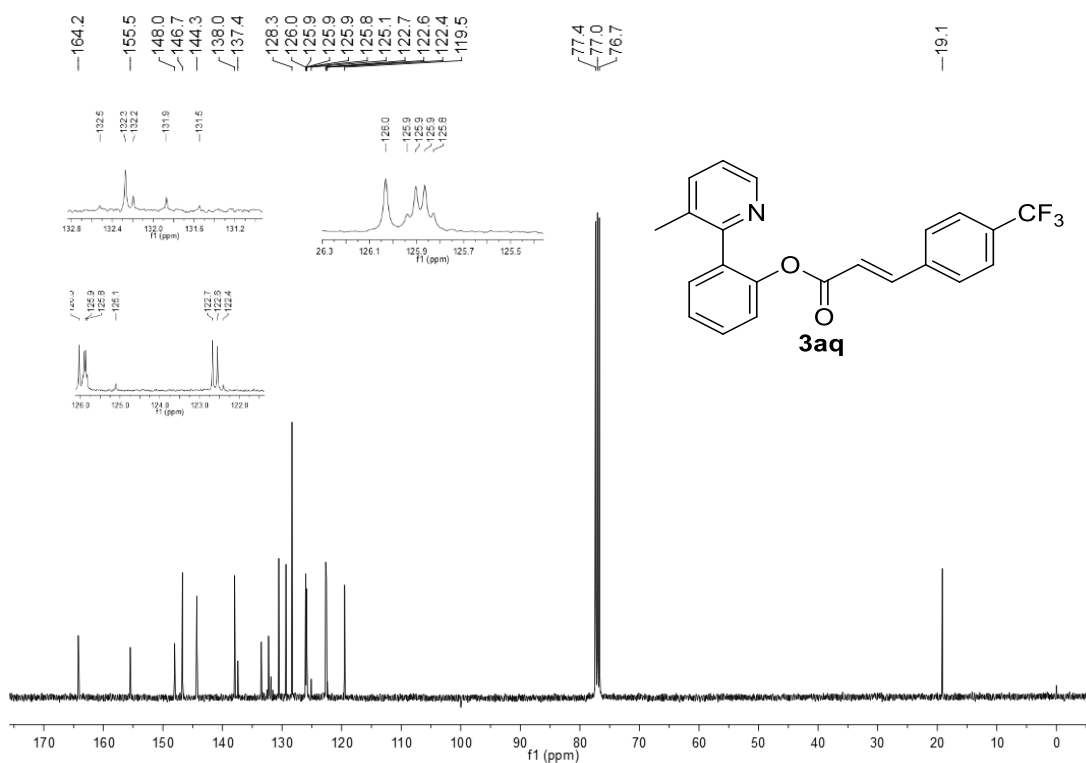

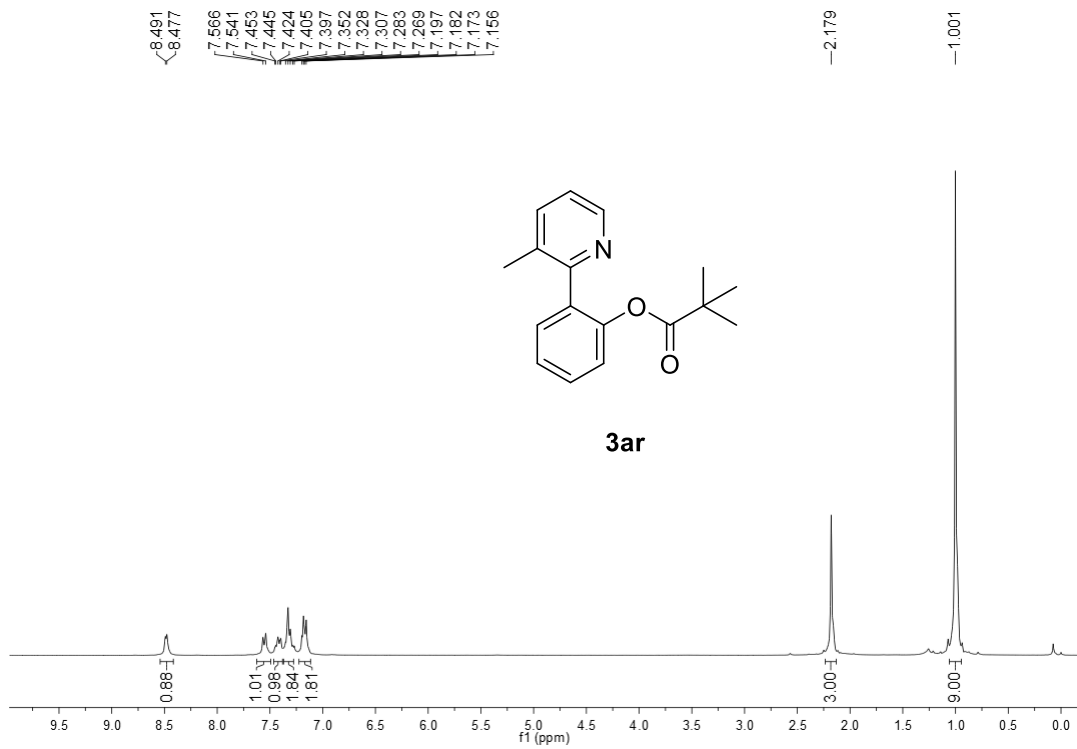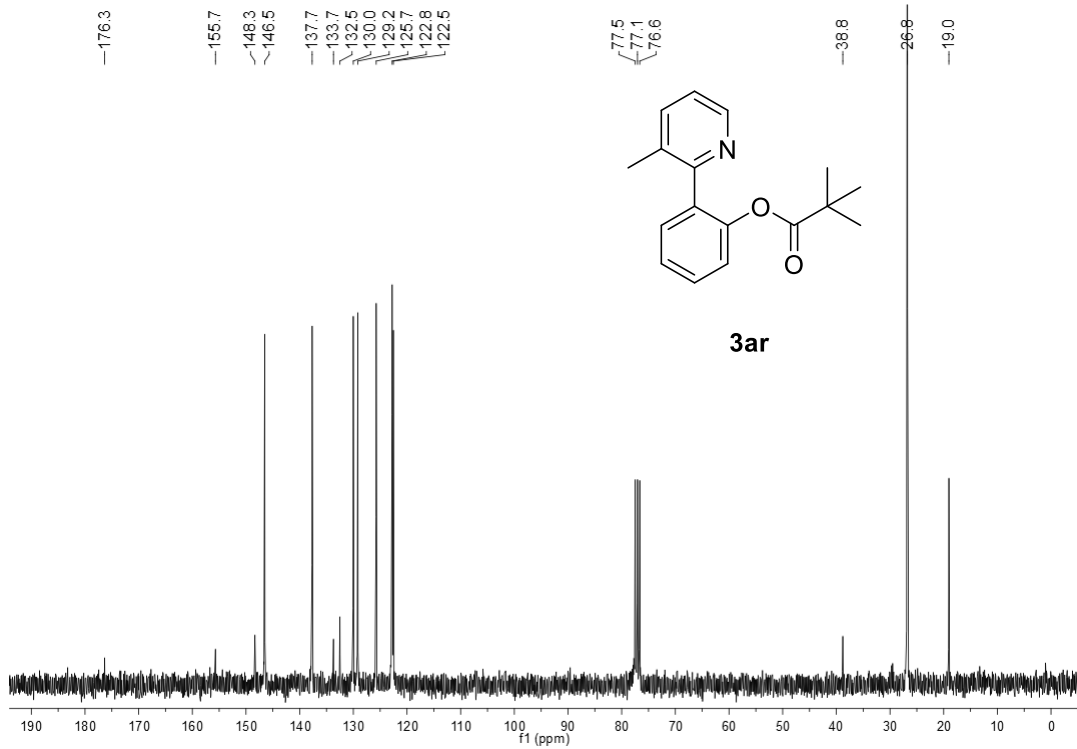

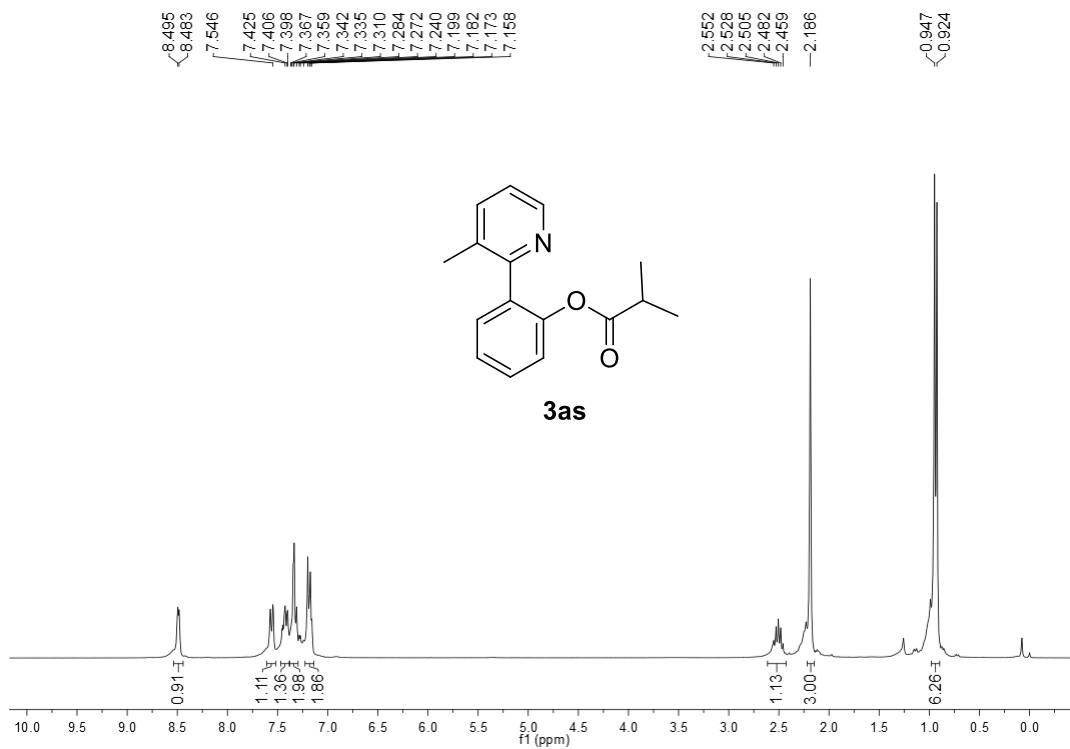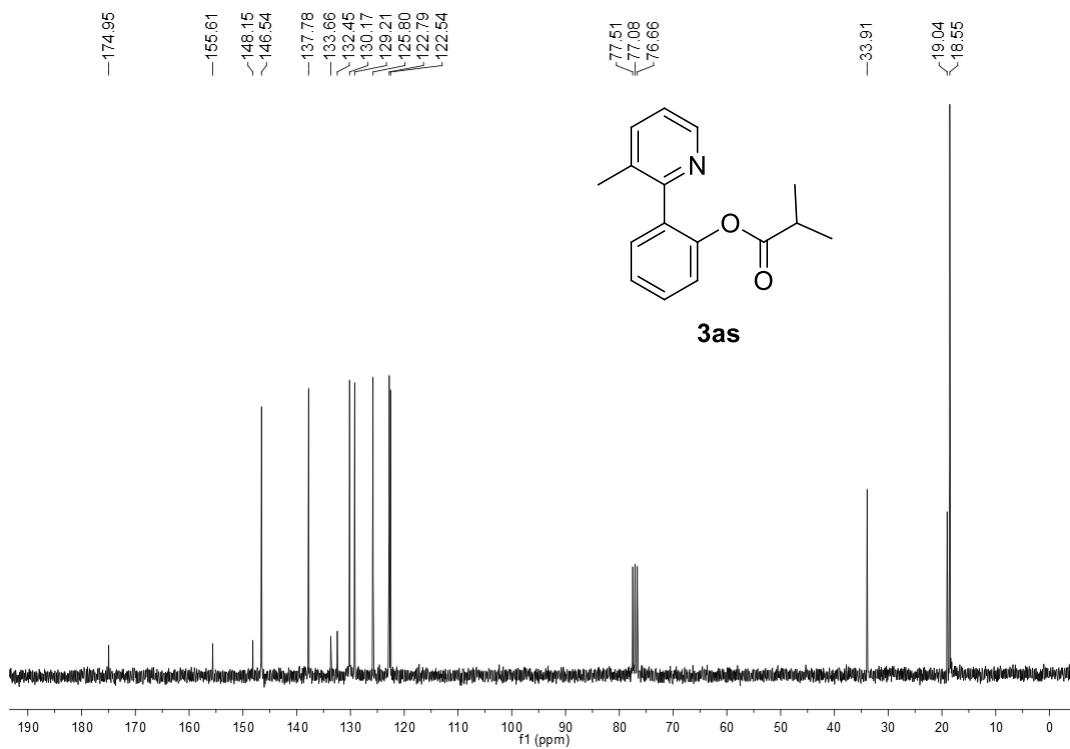

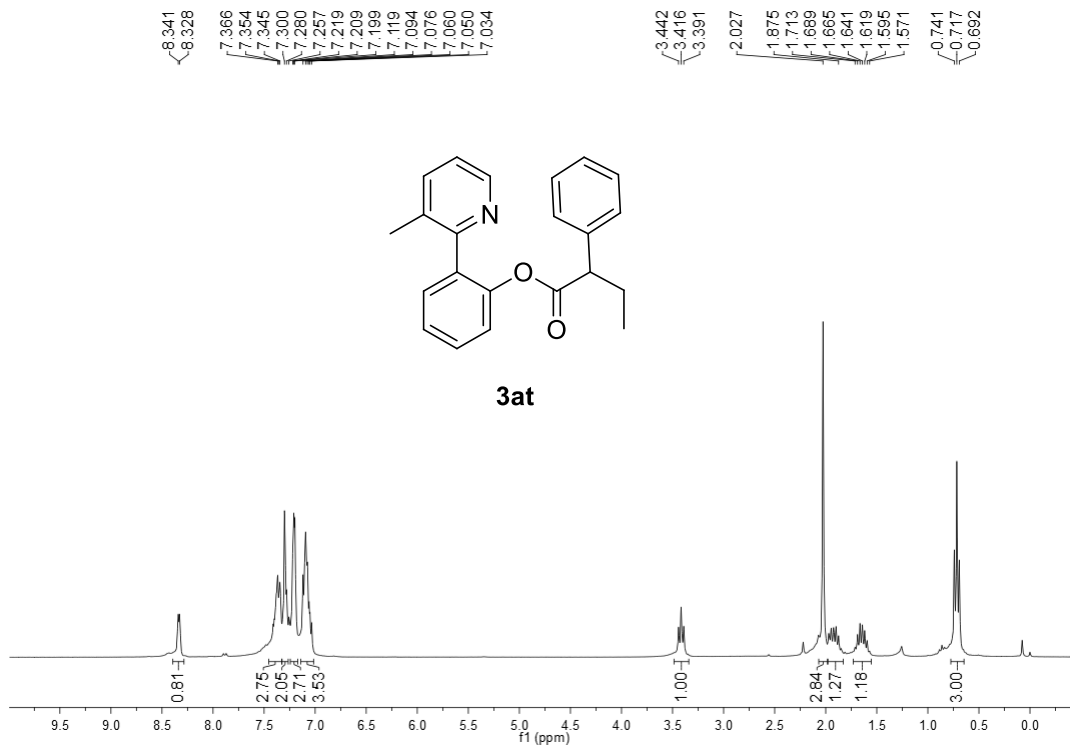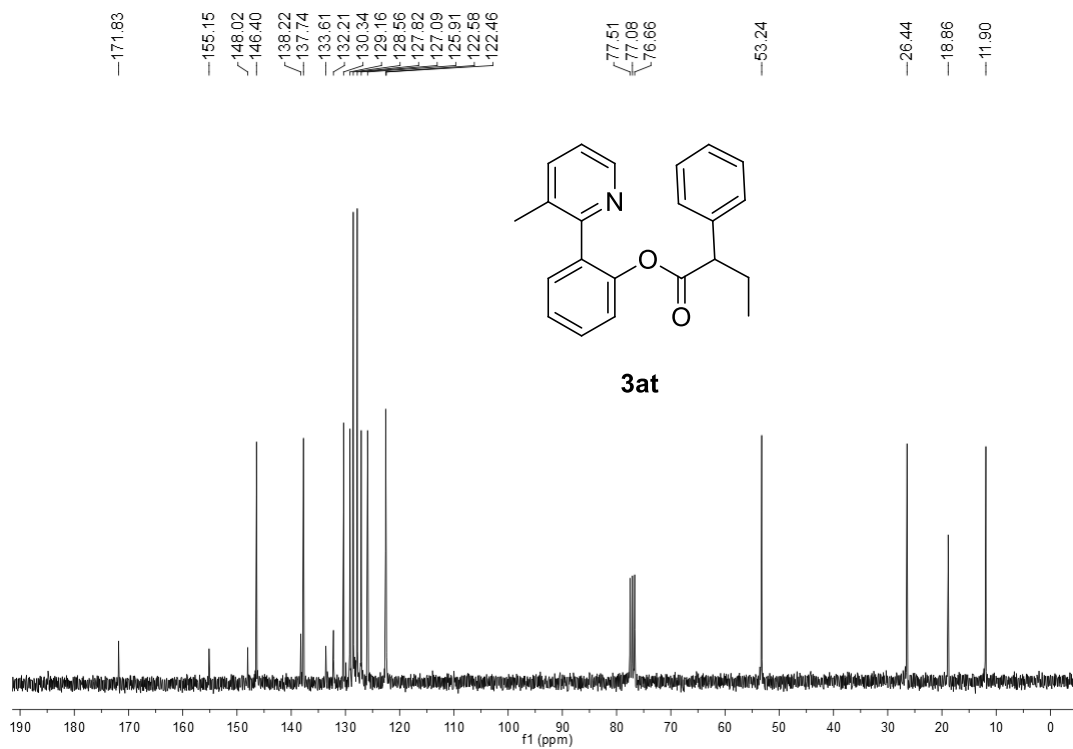

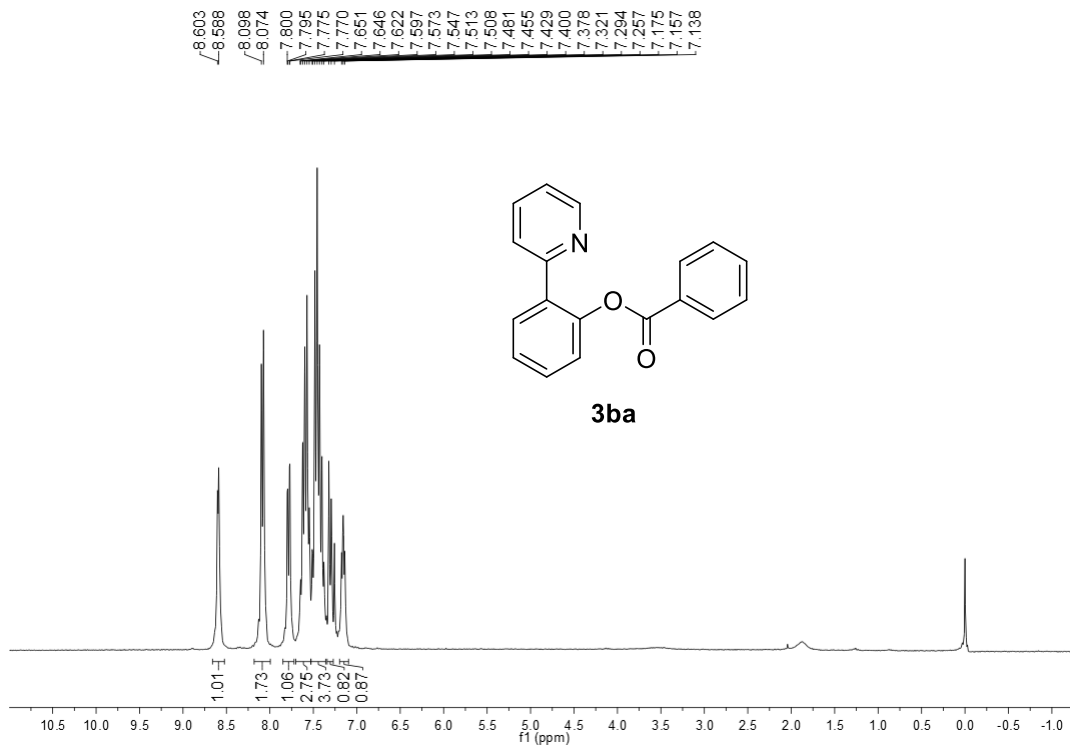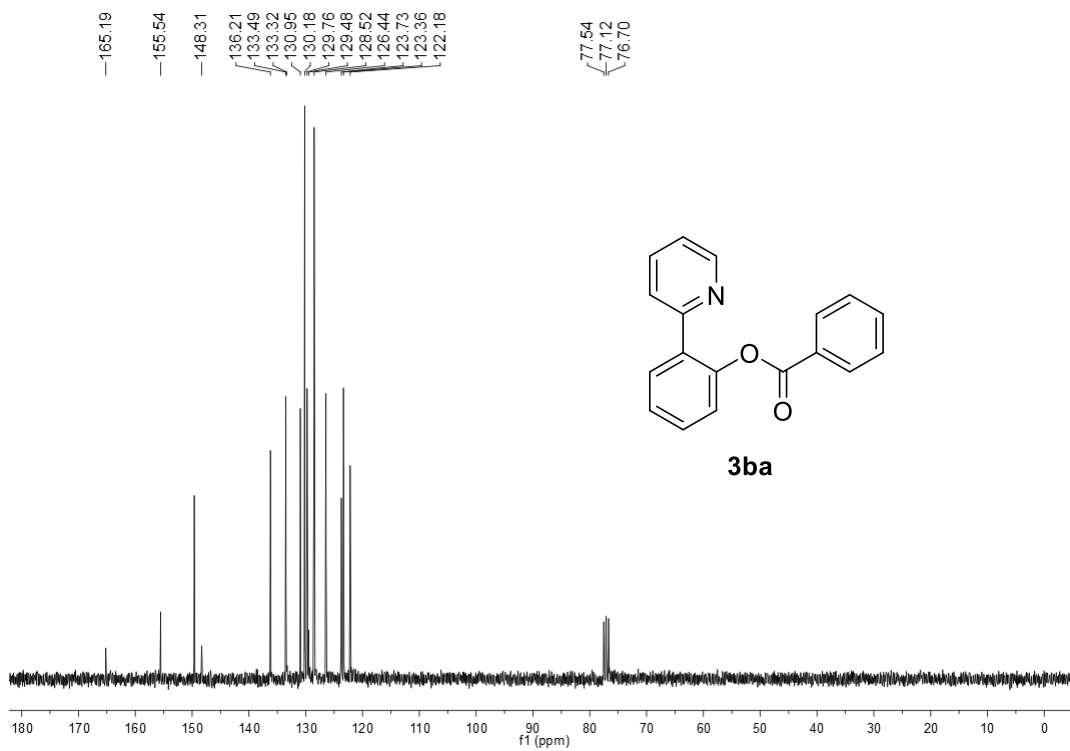

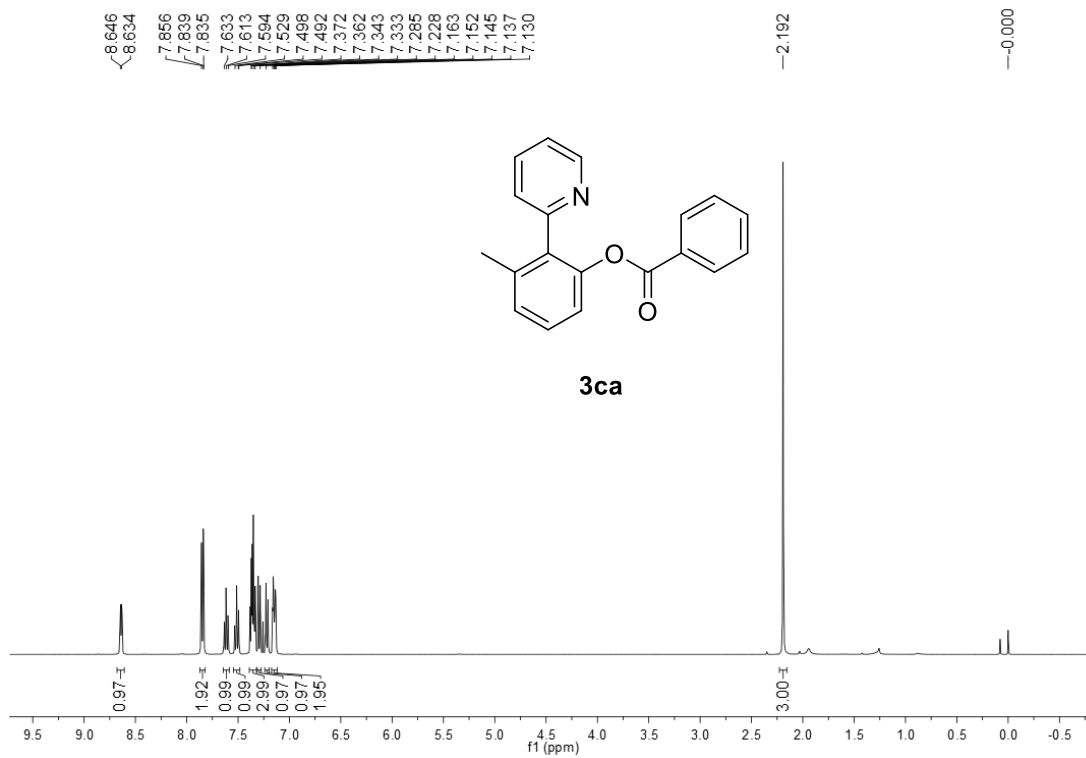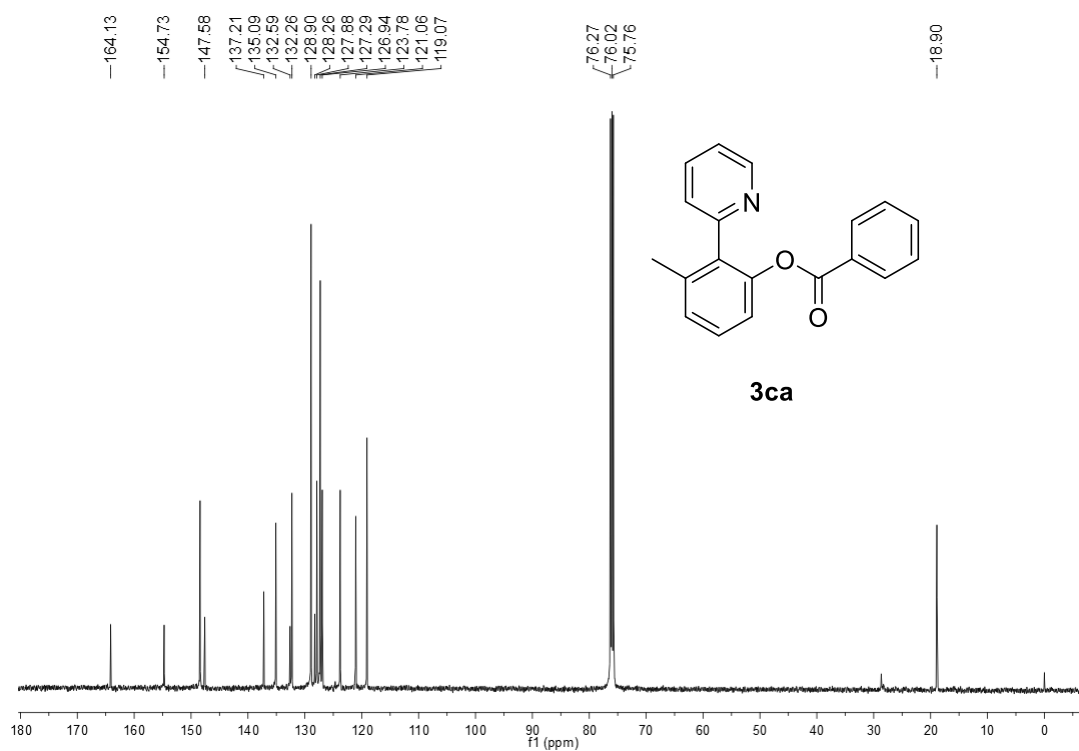

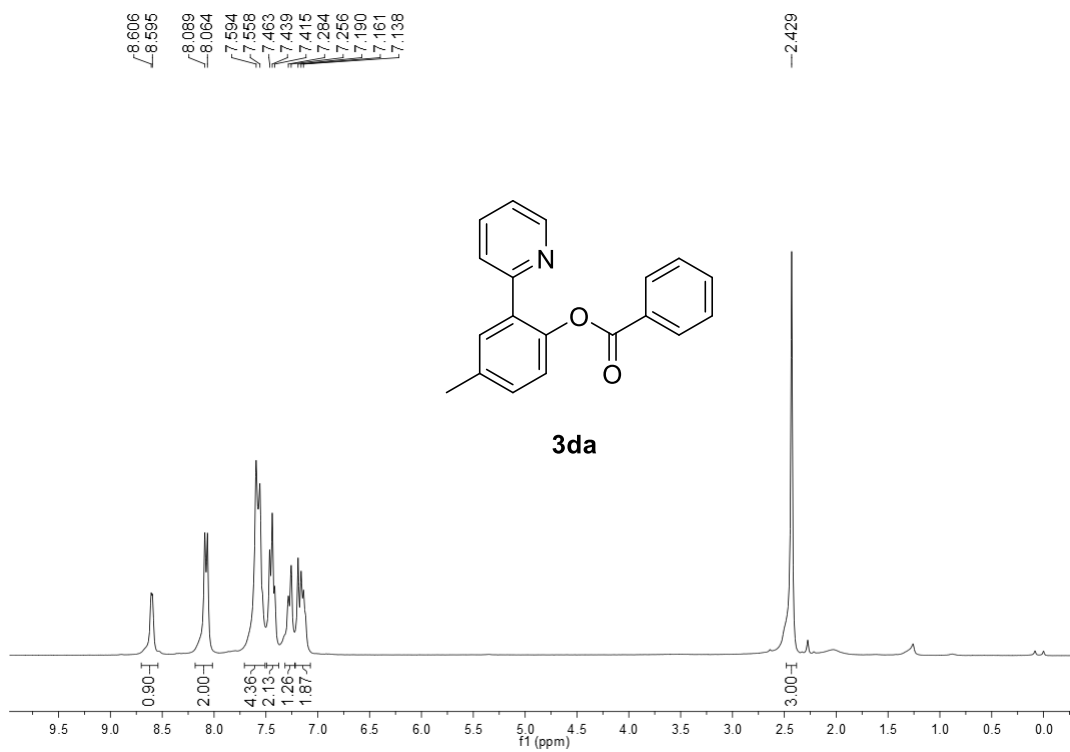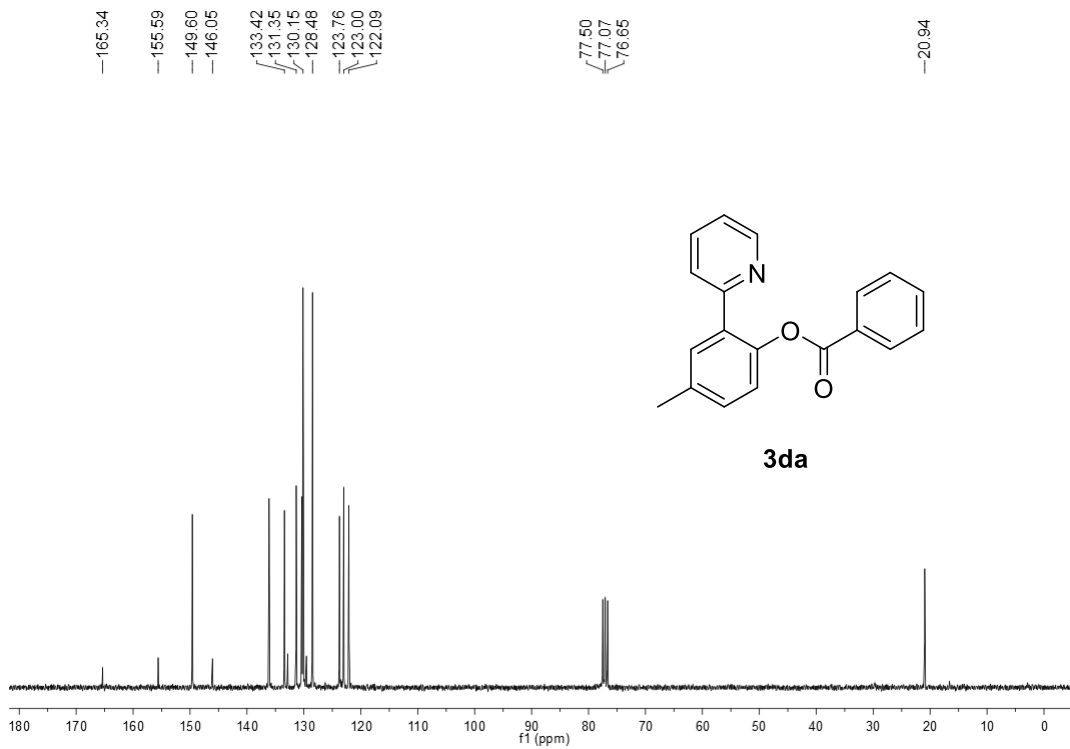



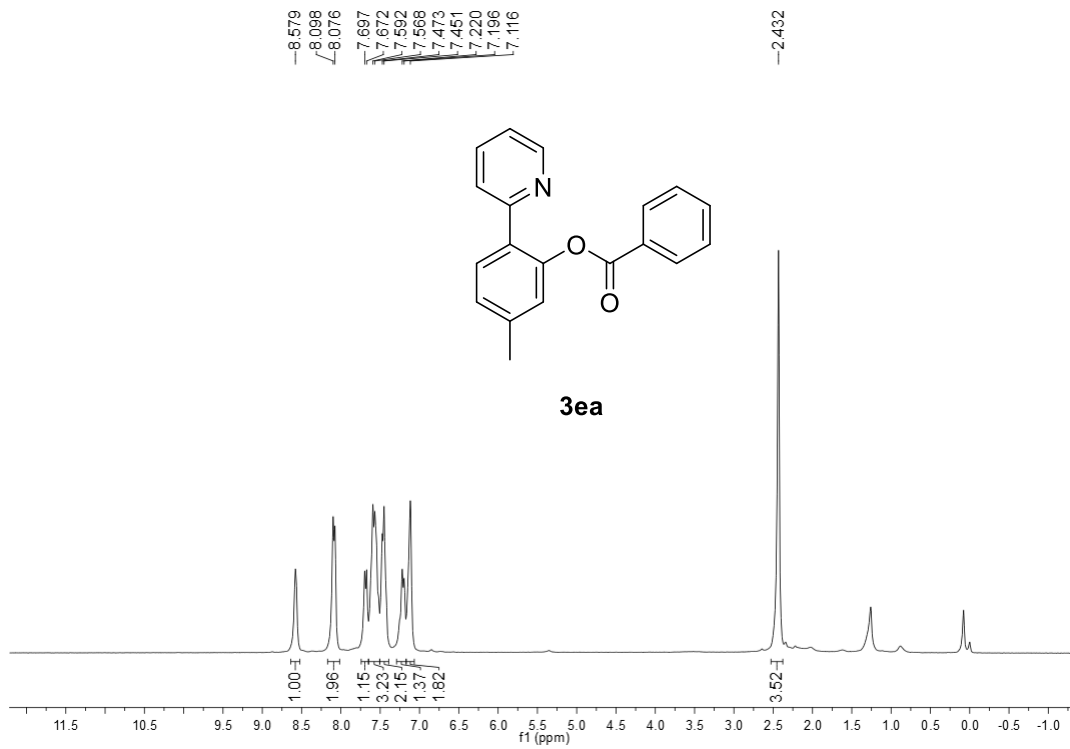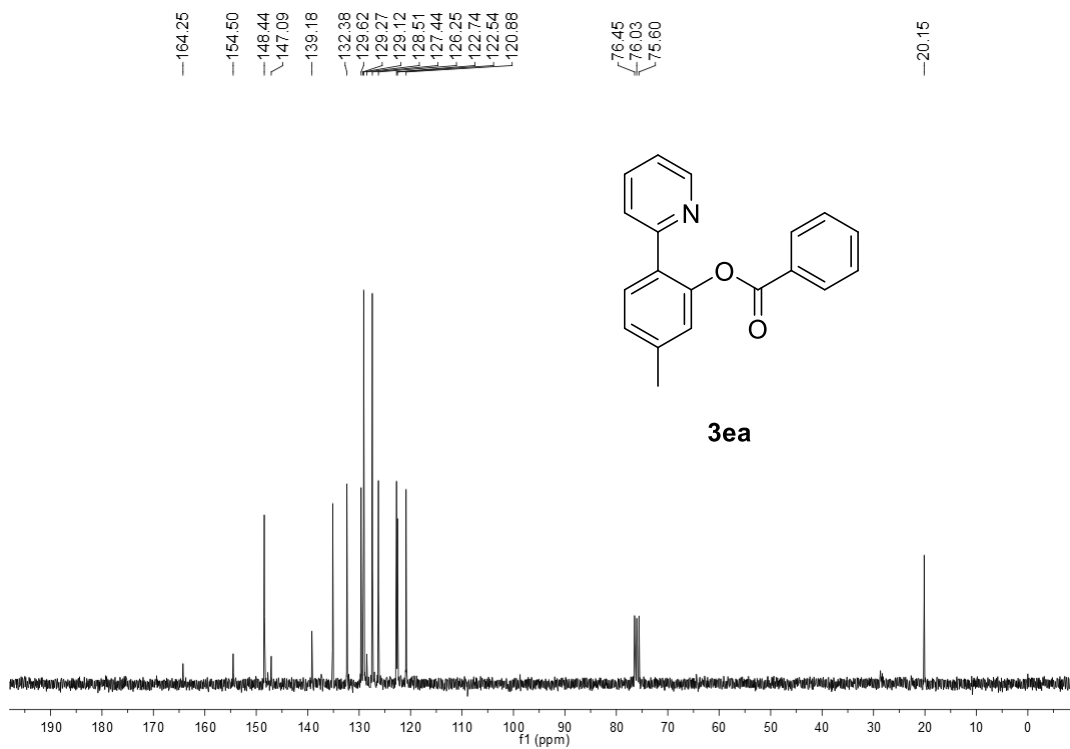

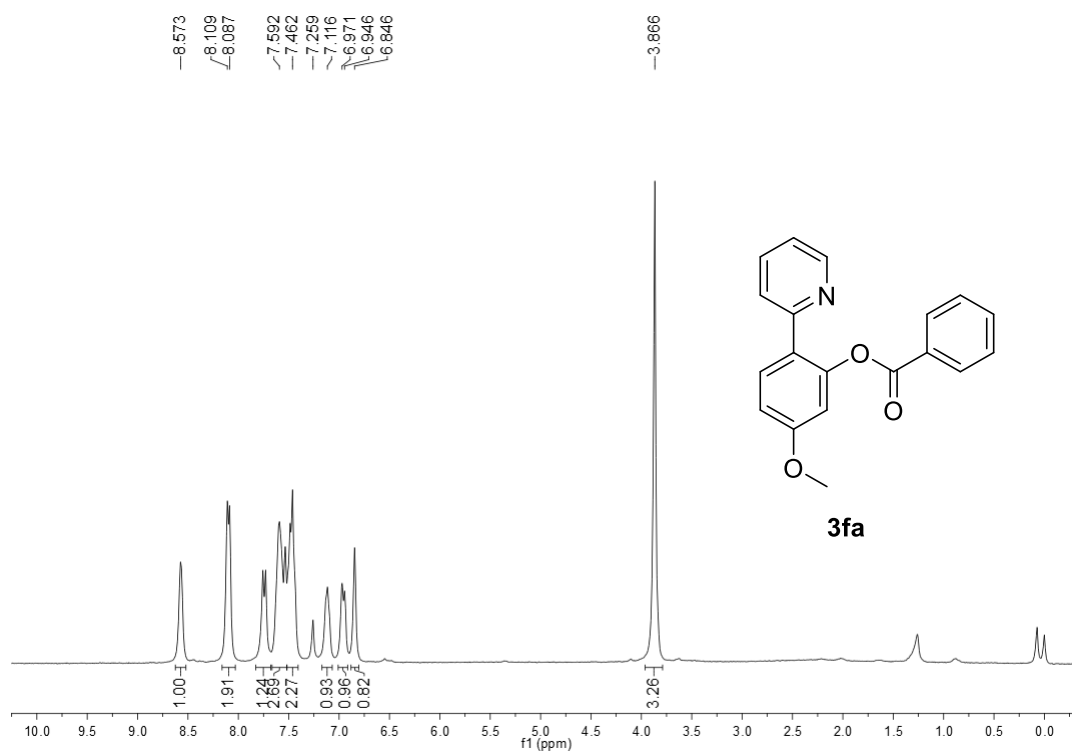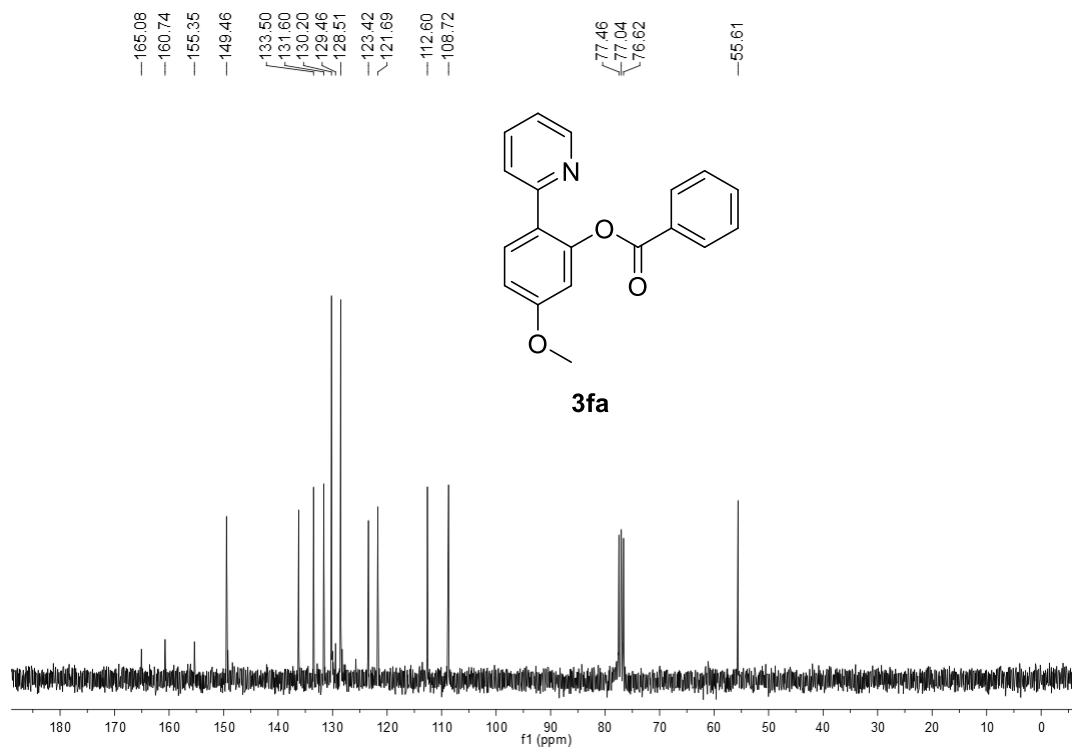

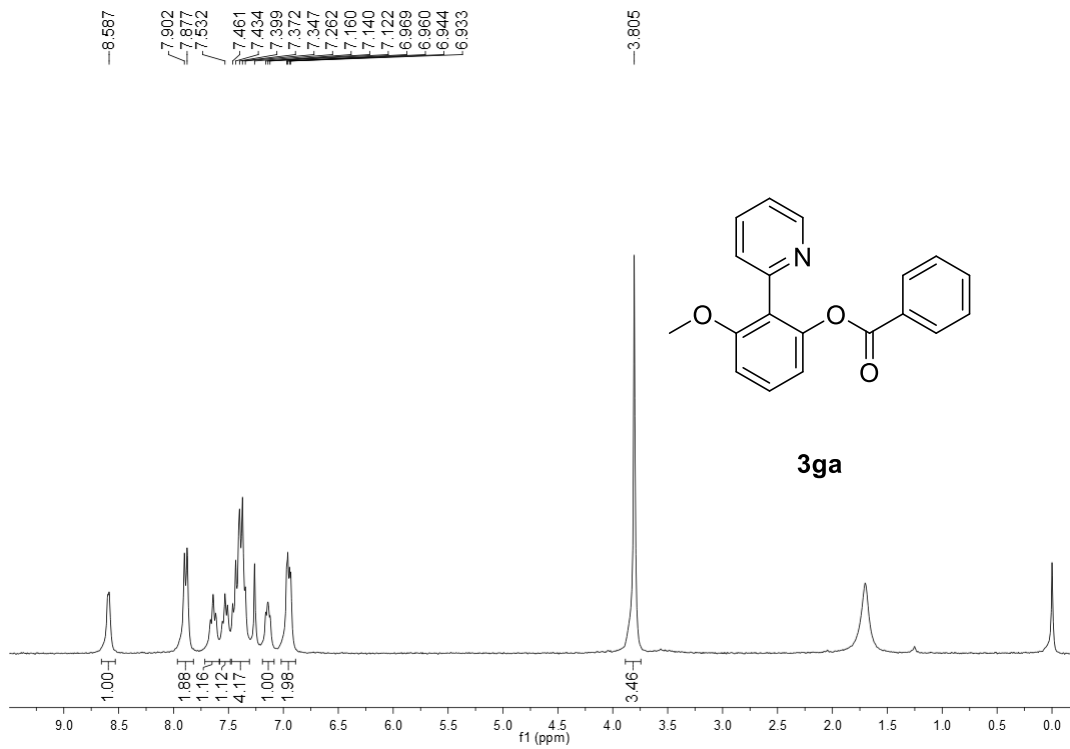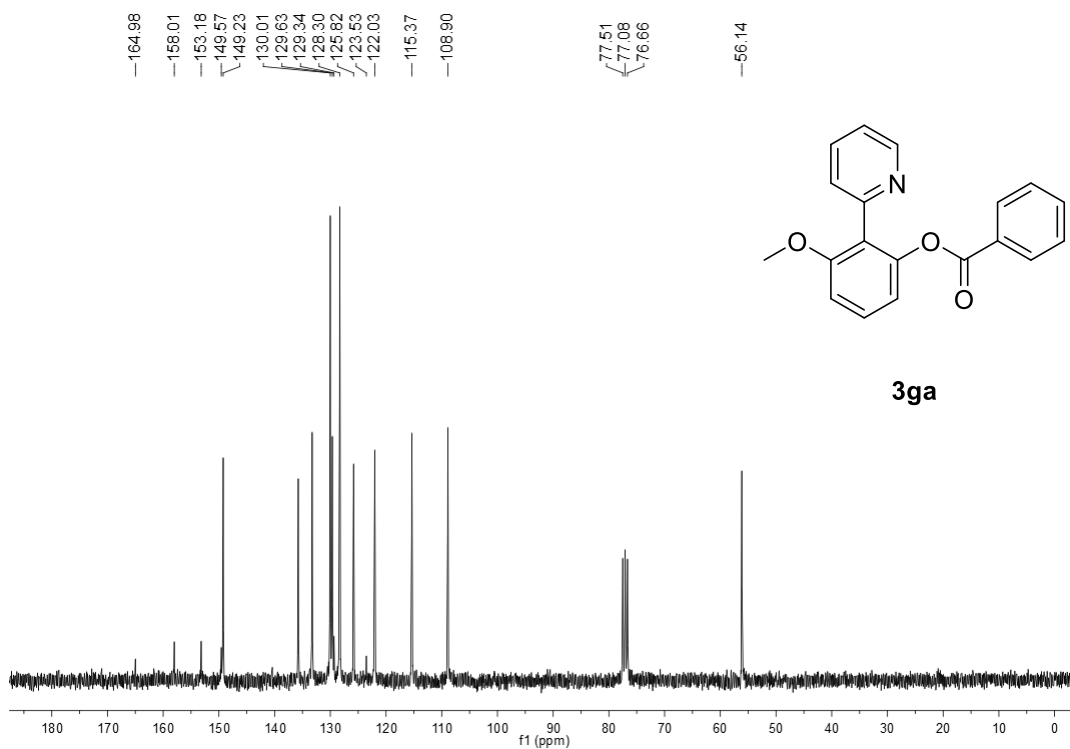

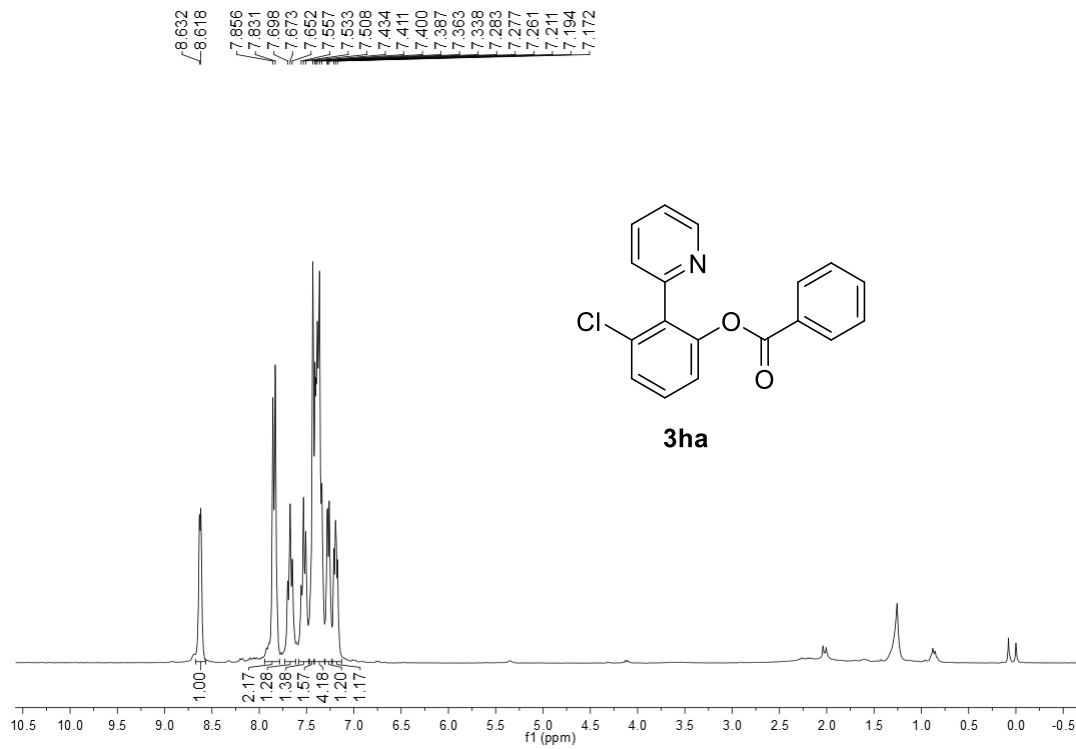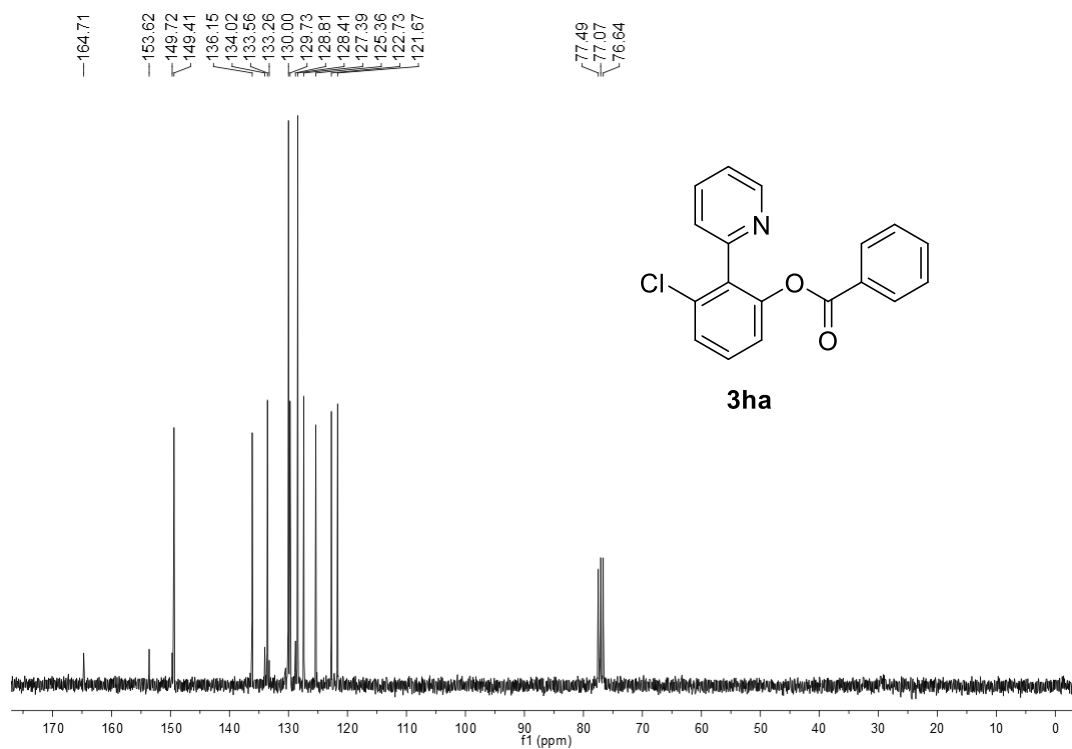

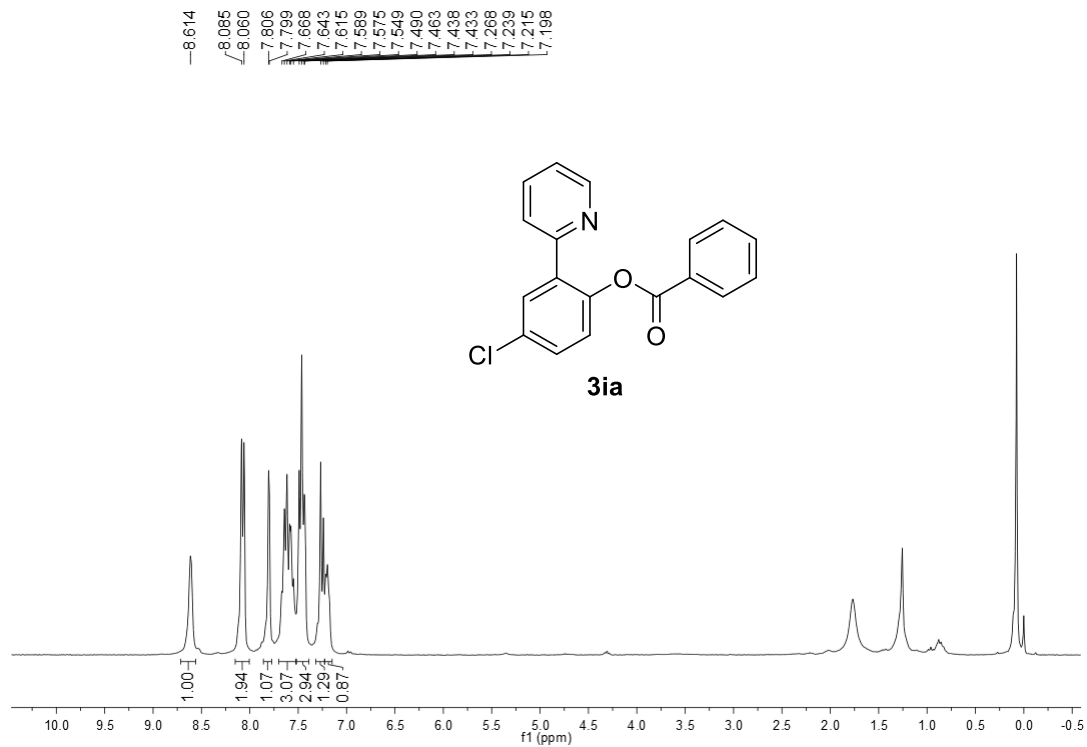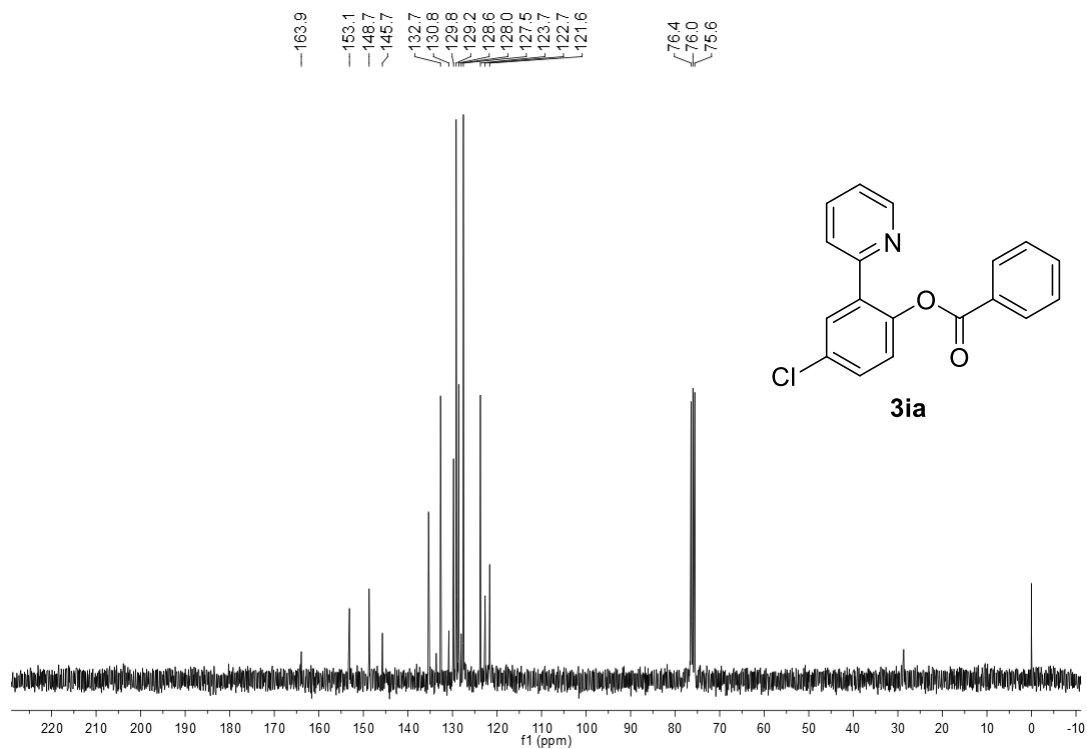

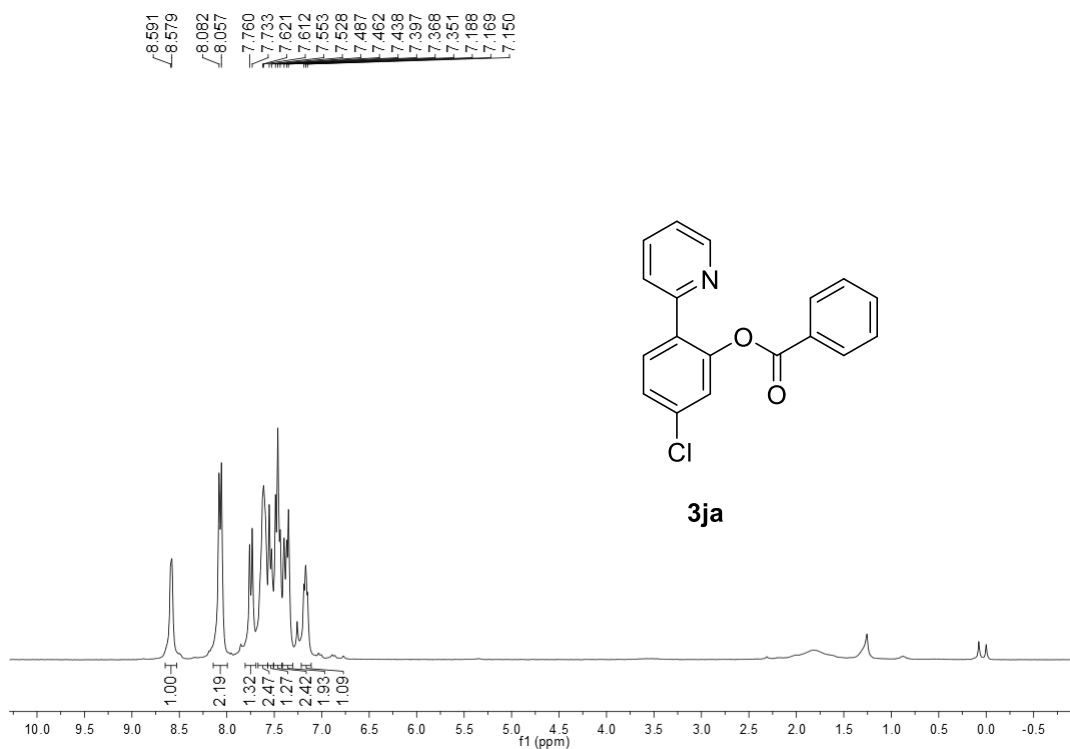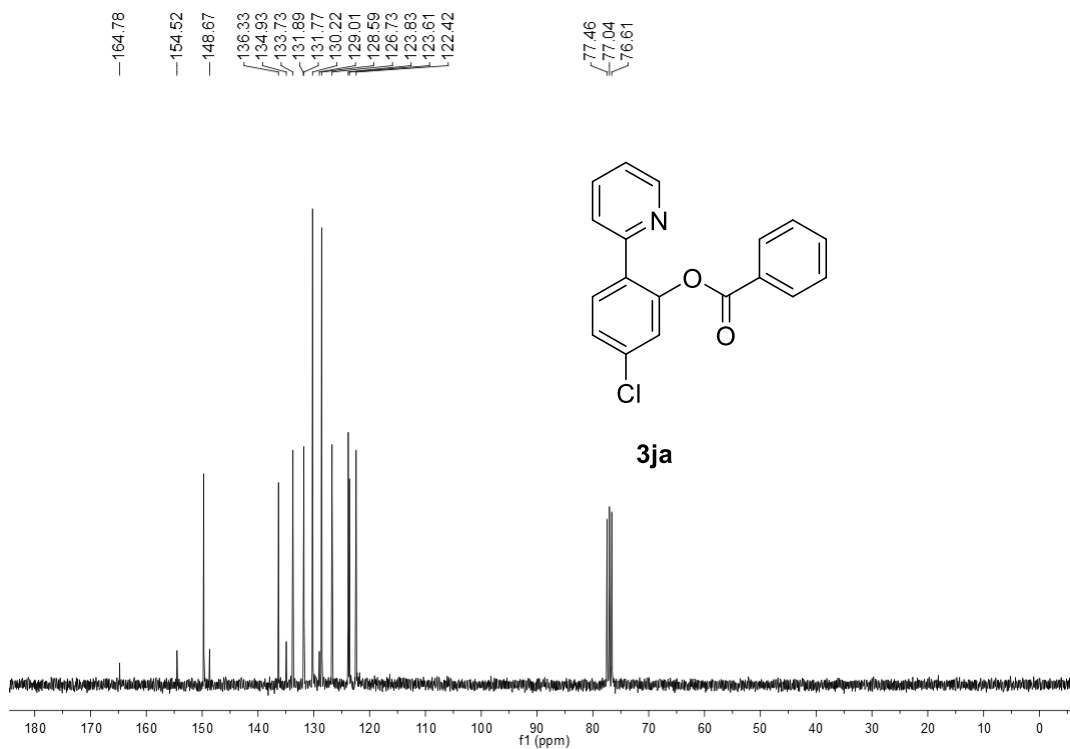

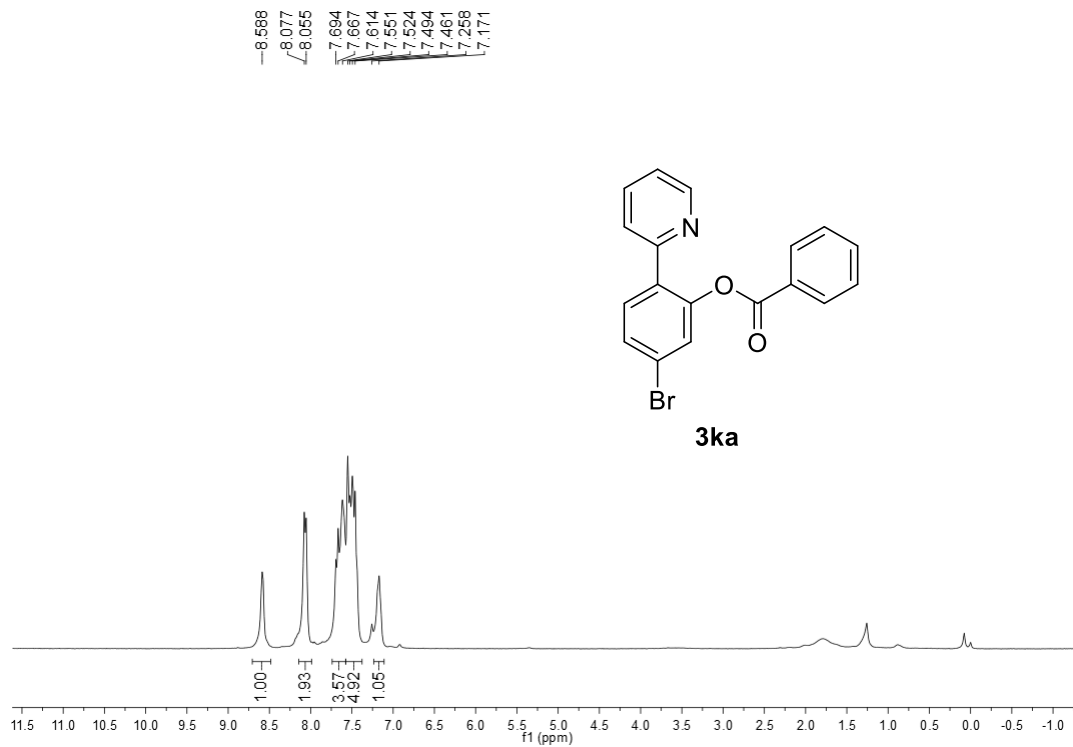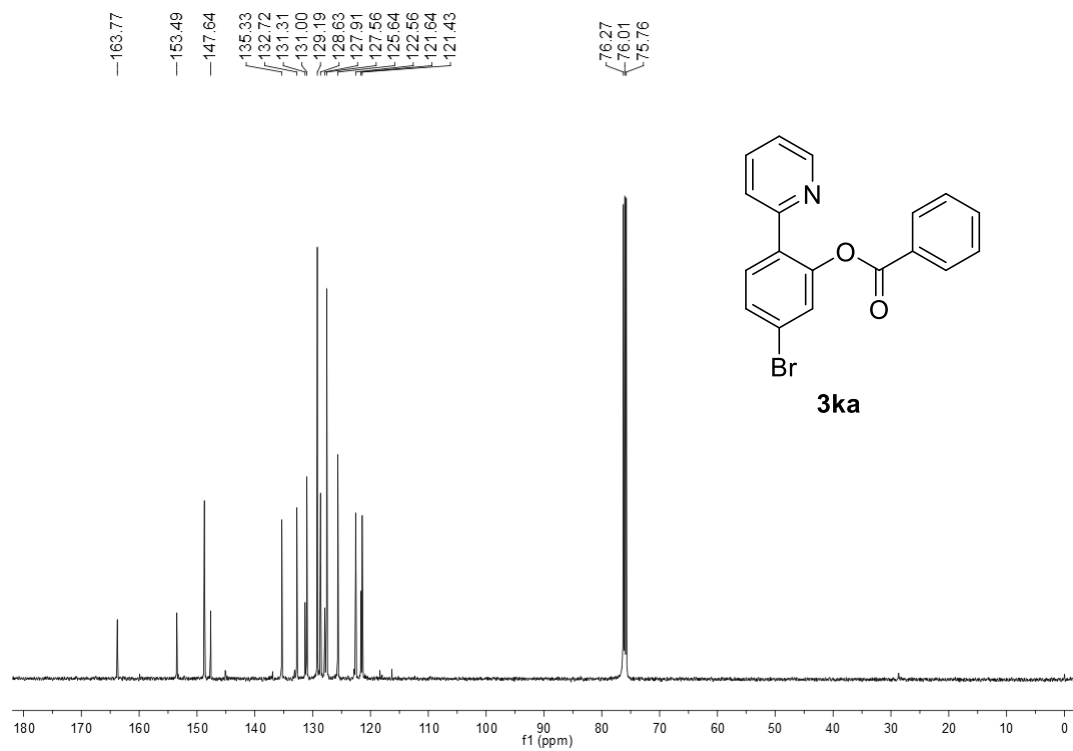

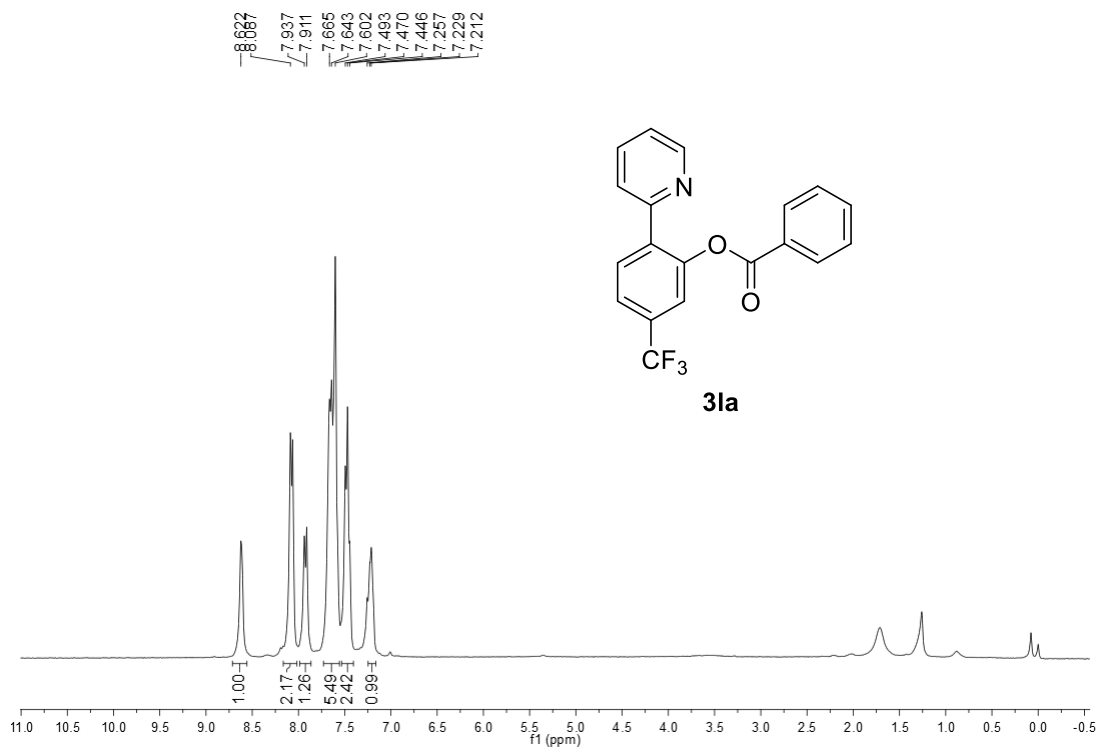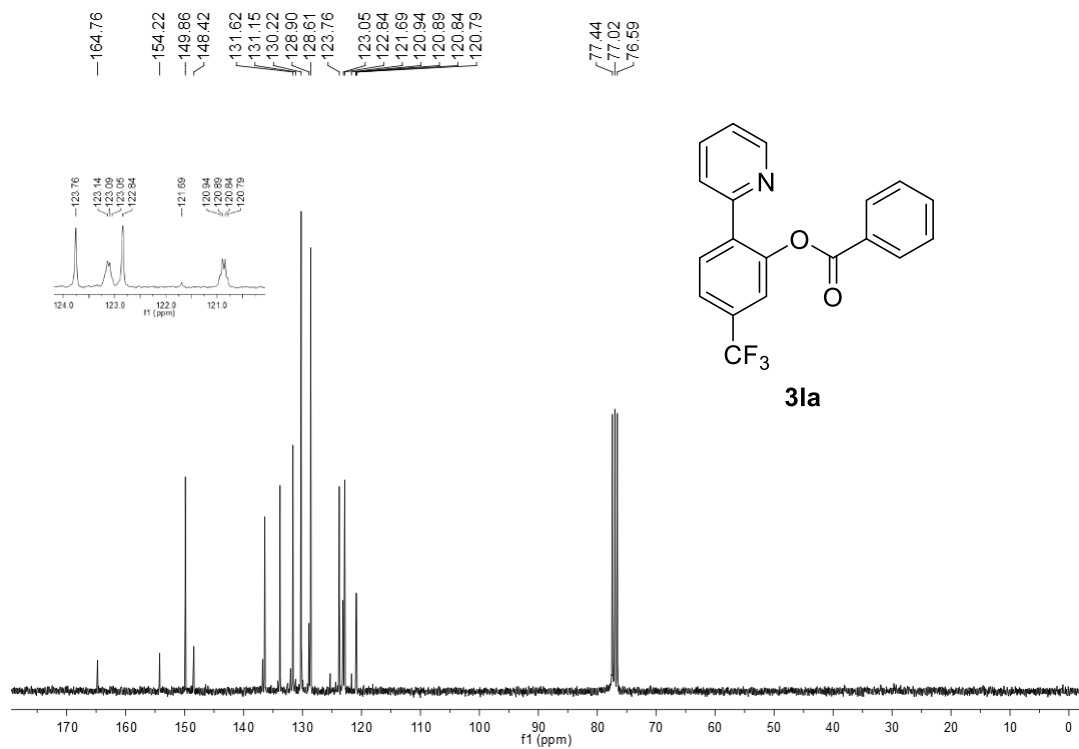



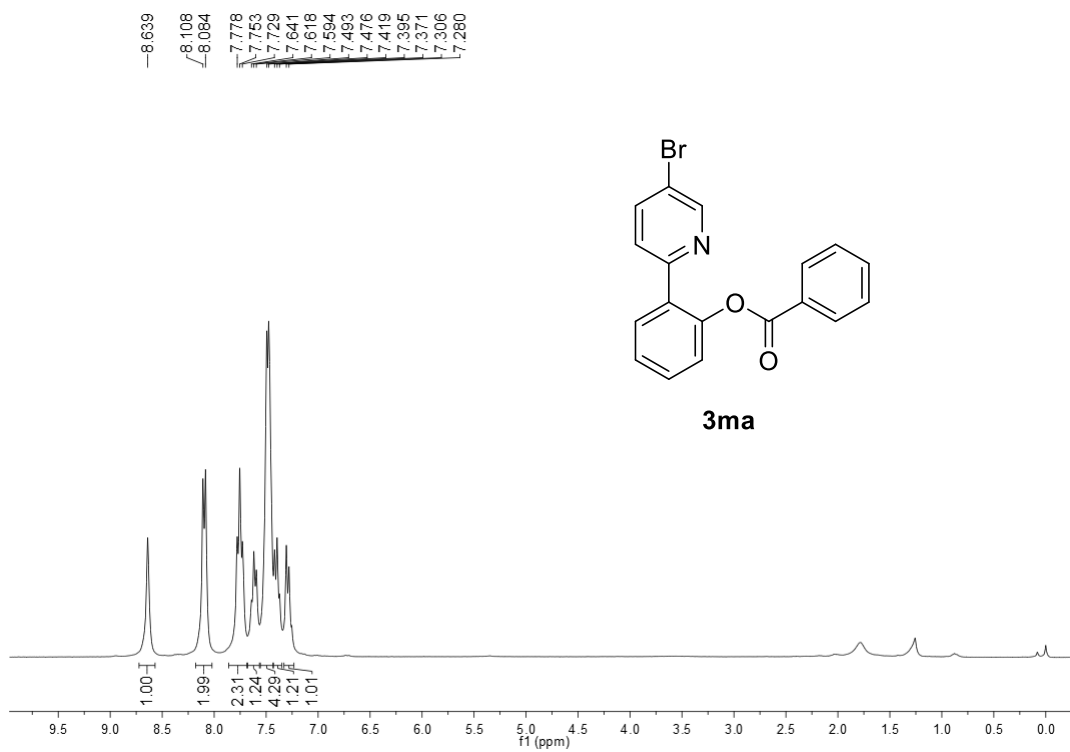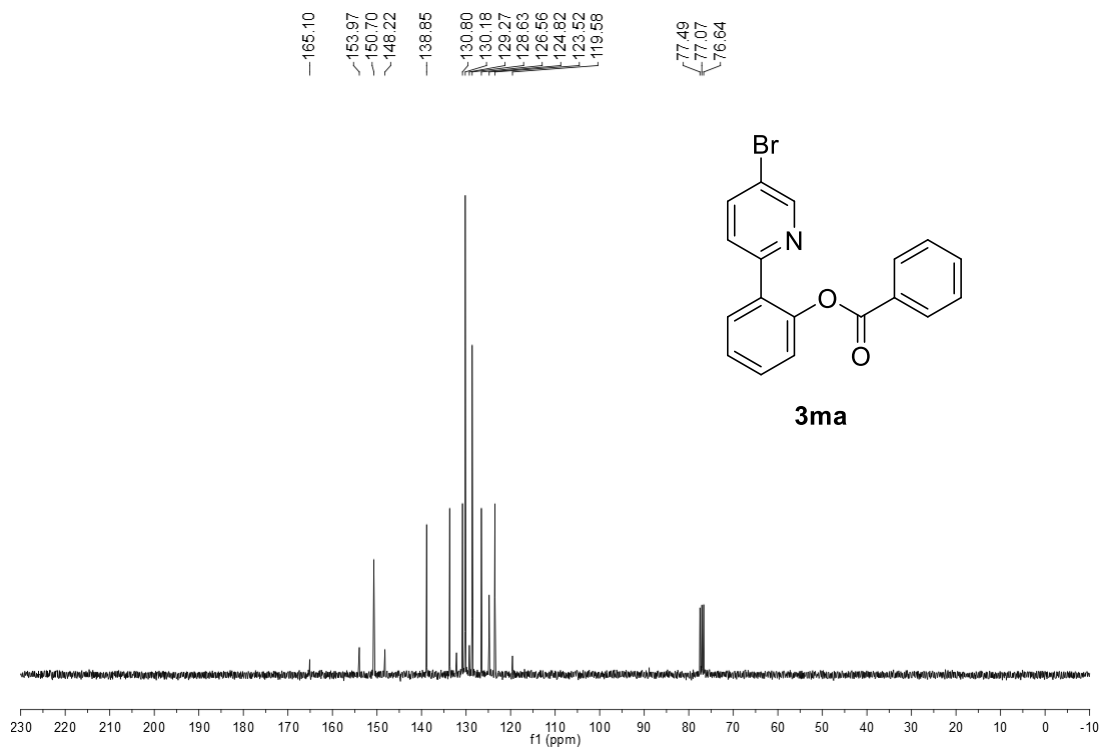

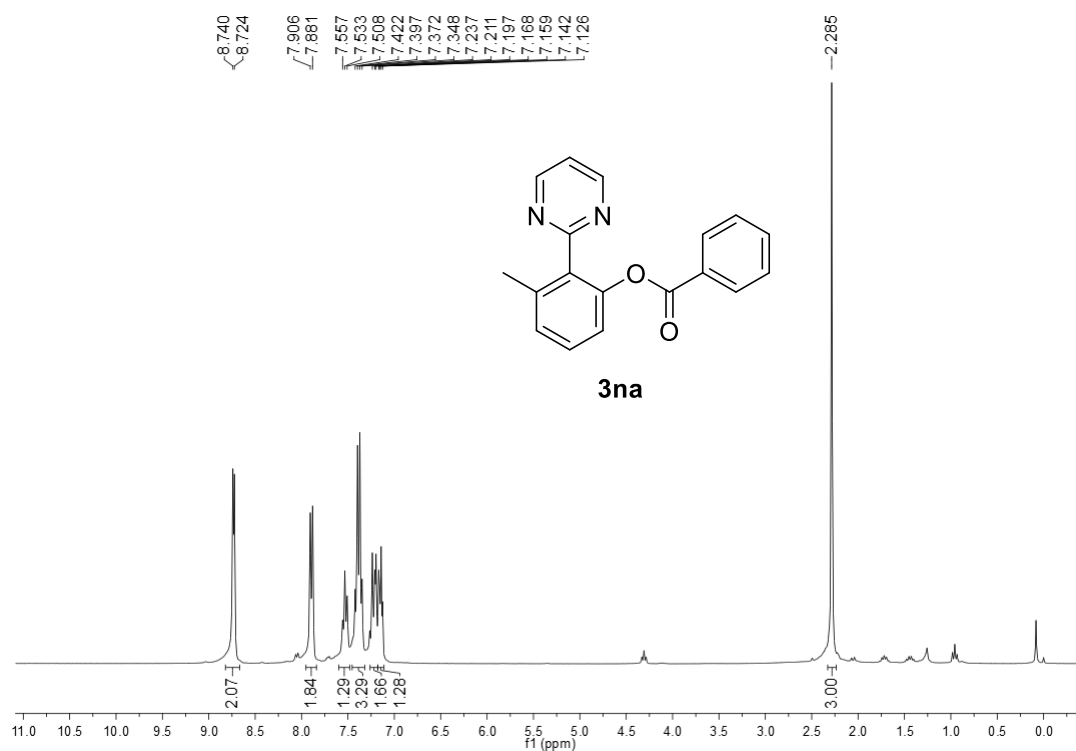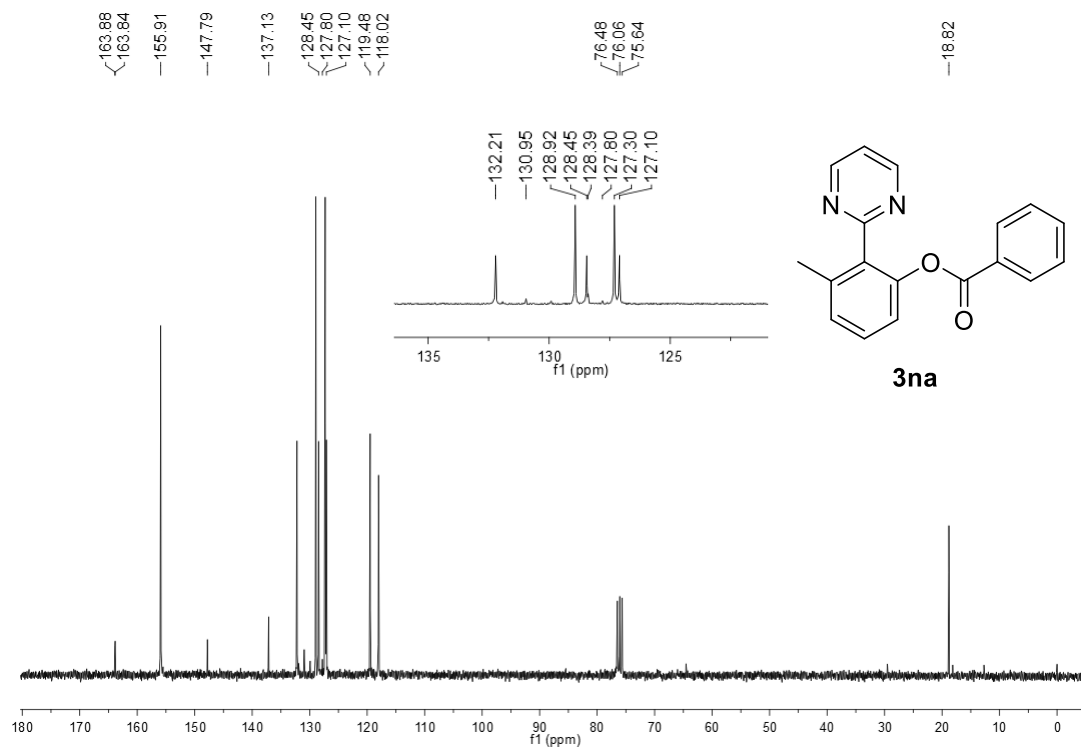

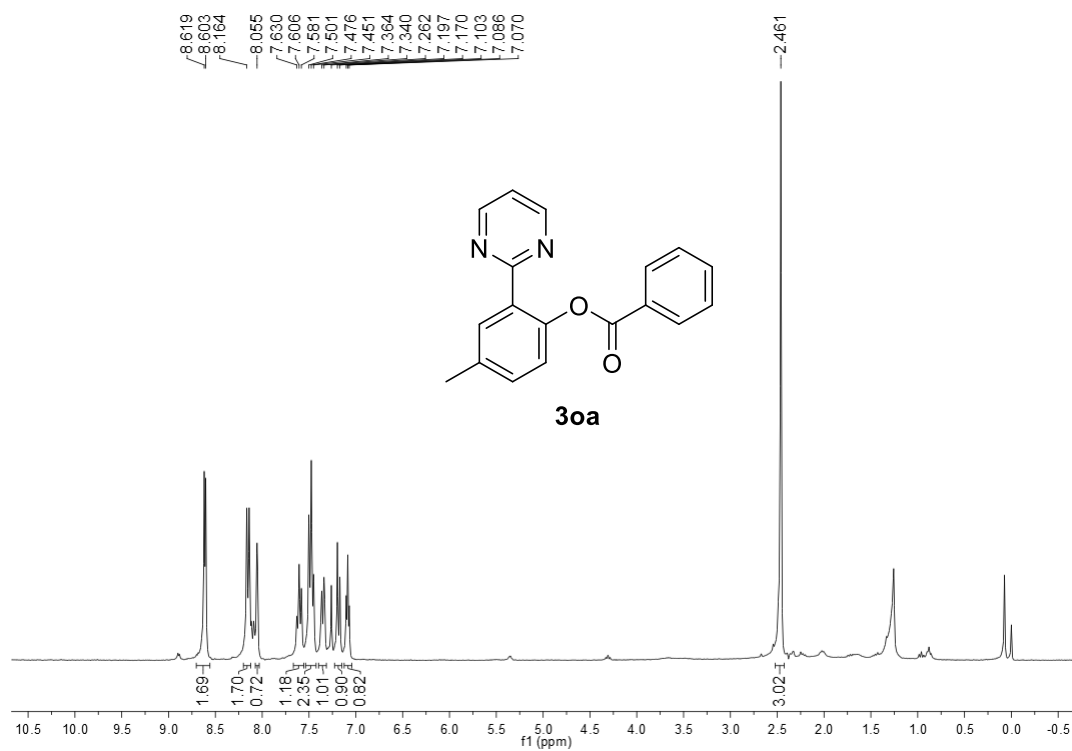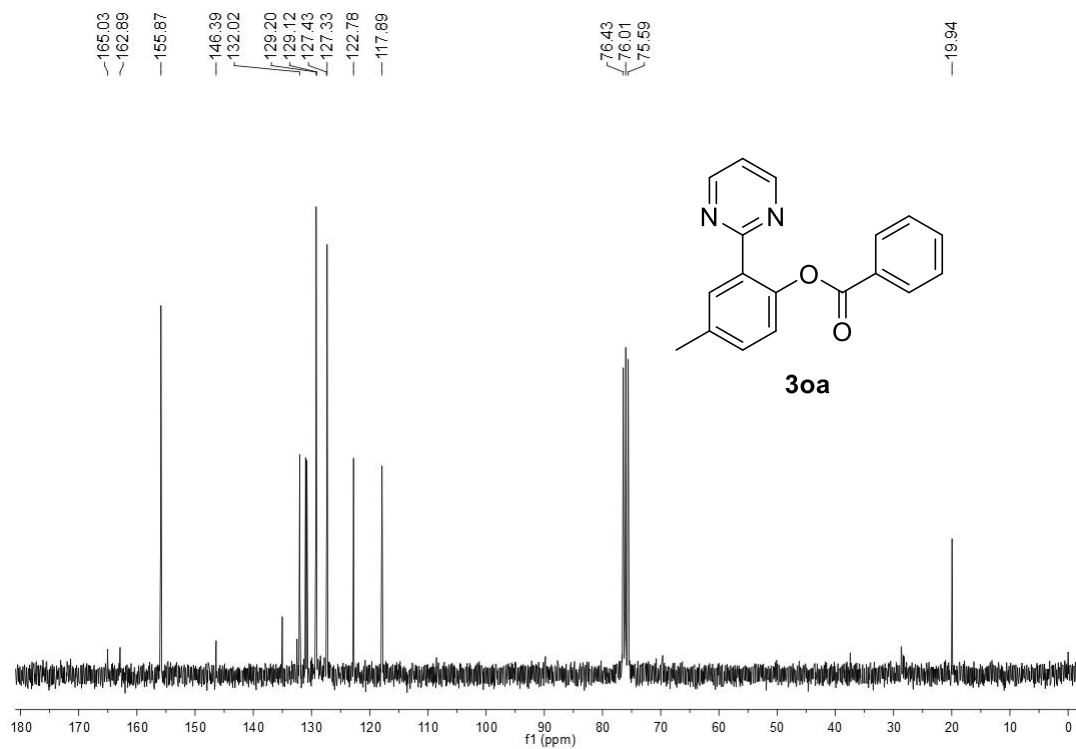

Supplement: c8ra01974f1.pdf [file c8ra01974f1.pdf]
